# Supplementary material for: A photoredox/nickel dual-catalytic strategy for benzylic C–H alkoxylation
Source: Royal Society of Chemistry journal article supplement (doi:10.1039/d1qo01421h), 2021-01-01

## *Supporting information*

# **A Photoredox/Nickel Dual-Catalytic Strategy for Benzylic C-H Alkoxylation**

Min Dong,<sup>+a</sup> Yuqi Jia,<sup>+a</sup> Wei Zhou,<sup>a</sup> Jinlai Gao,<sup>a</sup> Xiaoqing Lv,<sup>a</sup> Fan Luo,<sup>b</sup> Yongqiang Zhang,<sup>\*b</sup> and  
Shihui Liu<sup>\*a</sup>

<sup>a</sup> College of Medicine, Jiaxing University, 118 Jiahang Road, Jiaxing 314001, P.  
R. China. Email: liushihui12310@zjxu.edu.cn; yongqiangzhang@ecust.edu.cn.

<sup>b</sup> School of Pharmacy, East China University of Science and Technology, 130 Meilong Road,  
Shanghai 200237, P. R. China.

<sup>+</sup> These two authors contributed equally to this paper.

## **Table of Contents**

|                                                                                                  |     |
|--------------------------------------------------------------------------------------------------|-----|
| 1. The Optimization of Photoredox/Nickel Dual-Catalyzed Benzylic C-H Alkoxylation.....           | S1  |
| 2. The Study of the Mechanism of Photoredox/Nickel Dual-Catalyzed Benzylic C-H Alkoxylation..... | S7  |
| 3. Experiment Procedures and Product Characterization.....                                       | S13 |
| 4. References.....                                                                               | S41 |
| 5. Spectral Data for Products.....                                                               | S42 |

# 1. The Optimization of Photoredox/Nickel Dual-Catalyzed Benzylic C-H Alkoxylation.

**Table S1.** The optimization of photocatalyst. <sup>a</sup>

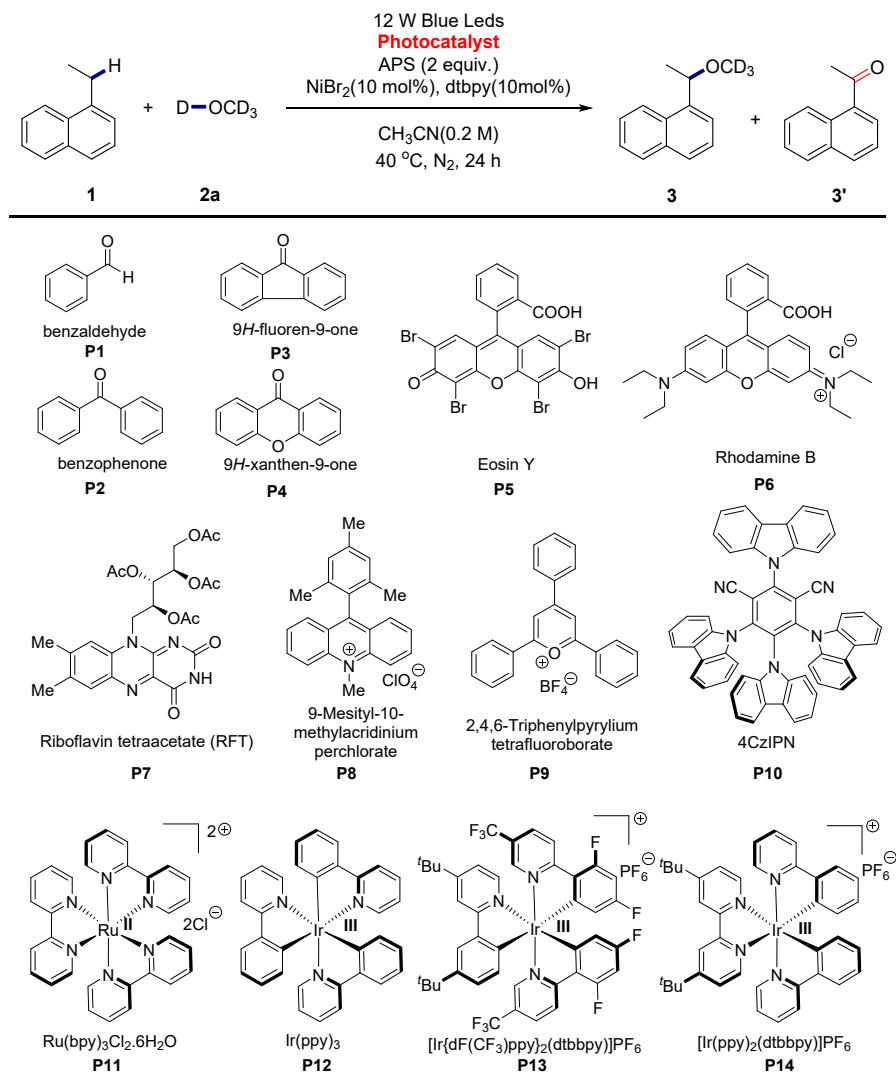

| Entry | Photocatalyst  | yield(3) <sup>b</sup> | yield(3') <sup>c</sup> |
|-------|----------------|-----------------------|------------------------|
| 1     | P1 (100 mol%)  | 16%                   | -                      |
| 2     | P2 (20 mol%)   | 22%                   | 4%                     |
| 3     | P3 (20 mol%)   | 14%                   | 3%                     |
| 4     | P4 (20 mol%)   | trace                 | -                      |
| 5     | P5 (5 mol%)    | trace                 | -                      |
| 6     | P6 (5 mol%)    | 30%                   | 5%                     |
| 7     | P7 (5 mol%)    | 16%                   | -                      |
| 8     | P8 (5 mol%)    | 32%                   | 5%                     |
| 9     | P9 (5 mol%)    | trace                 | -                      |
| 10    | P10 (5 mol%)   | 22%                   | 5%                     |
| 11    | P11 (1 mol%)   | trace                 | -                      |
| 12    | P12 (1 mol%)   | trace                 | -                      |
| 13    | P13 (1 mol%)   | 43%                   | 6%                     |
| 14    | P14 (1 mol%)   | 32%                   | 4%                     |
| 15    | P13 (0.5 mol%) | 33%                   | 5%                     |

16 **P13** (2 mol%) 43% 8%

<sup>a</sup> Conditions employed 12 W Blue Leds, **1** (0.5 mmol), **2a** (2.5 mmol), photocatalyst (1-100 mol%), APS (1.0 mmol), NiBr<sub>2</sub> (10 %mmol), dtbpy (10 %mmol), CH<sub>3</sub>CN (2.5 mL), the reaction mixture was degassed via freeze pump thaw (× 3 times) and refilled with N<sub>2</sub>, 40 °C, 24 h, unless otherwise noted; <sup>b</sup> Isolated yields were reported; <sup>c</sup> Yields were determined by <sup>1</sup>H NMR using 1,3,5-trimethoxybenzene as an internal standard.

**Table S2.** The optimization of the oxidant. <sup>a</sup>

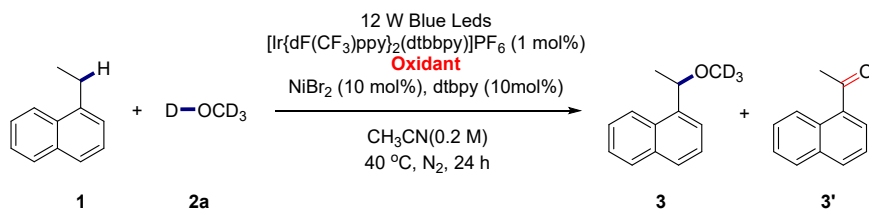

| Entry           | Oxidants                                                   | yield( <b>3</b> ) <sup>b</sup> | yield( <b>3'</b> ) <sup>c</sup> |
|-----------------|------------------------------------------------------------|--------------------------------|---------------------------------|
| 1               | APS(2.0 equiv.)                                            | 43%                            | 6%                              |
| 2               | Na <sub>2</sub> S <sub>2</sub> O <sub>8</sub> (2.0 equiv.) | n.d. <sup>d</sup>              | 9%                              |
| 3               | K <sub>2</sub> S <sub>2</sub> O <sub>8</sub> (2.0 equiv.)  | n.d. <sup>d</sup>              | 7%                              |
| 4               | Selectfluor(2.0 equiv.)                                    | 54%                            | -                               |
| 5               | NFSI(2.0 equiv.)                                           | 46%                            | 5%                              |
| 6               | Et <sub>3</sub> N • 3HF(2.0 equiv.)                        | n.d. <sup>d</sup>              | -                               |
| 7               | NBS(2.0 equiv.)                                            | trace                          | 7%                              |
| 8               | NCS(2.0 equiv.)                                            | 35%                            | 6%                              |
| 9               | PIDA(2.0 equiv.)                                           | trace                          | 6%                              |
| 10              | PIFA(2.0 equiv.)                                           | 20%                            | 7%                              |
| 11              | mCPBA(2.0 equiv.)                                          | n.d. <sup>d</sup>              | 15%                             |
| 12              | Oxane(2.0 equiv.)                                          | n.d. <sup>d</sup>              | 20%                             |
| 13 <sup>e</sup> | Selectfluor(1.0 equiv.)                                    | 24%                            | -                               |
| 14 <sup>f</sup> | Selectfluor(1.5 equiv.)                                    | 44%                            | -                               |
| 15 <sup>g</sup> | Selectfluor(2.5 equiv.)                                    | 46%                            | -                               |
| 15 <sup>h</sup> | Selectfluor(3.0 equiv.)                                    | 45%                            | -                               |

<sup>a</sup> Conditions employed 12 W Blue Leds, **1** (0.5 mmol), **2a** (2.5 mmol), [Ir{dF(CF<sub>3</sub>)ppy}<sub>2</sub>(dtbbpy)]PF<sub>6</sub> (1 mol%), NiBr<sub>2</sub> (10 %mmol), dtbpy (10 %mmol), oxidant (1.0 mmol), CH<sub>3</sub>CN (2.5 mL), the reaction mixture was degassed via freeze pump thaw (× 3 times) and refilled with N<sub>2</sub>, 40 °C, 24 h, unless otherwise noted; <sup>b</sup> Isolated yields were reported; <sup>c</sup> Yields were determined by <sup>1</sup>H NMR using 1,3,5-trimethoxybenzene as an internal standard; <sup>d</sup> not detected; <sup>e</sup> 0.5 mmol Selectfluor was used; <sup>f</sup> 0.75 mmol Selectfluor was used; <sup>g</sup> 1.25 mmol Selectfluor was used; <sup>h</sup> 1.5 mmol Selectfluor was used.

**Table S3.** The optimization of the nickel salts. <sup>a</sup>

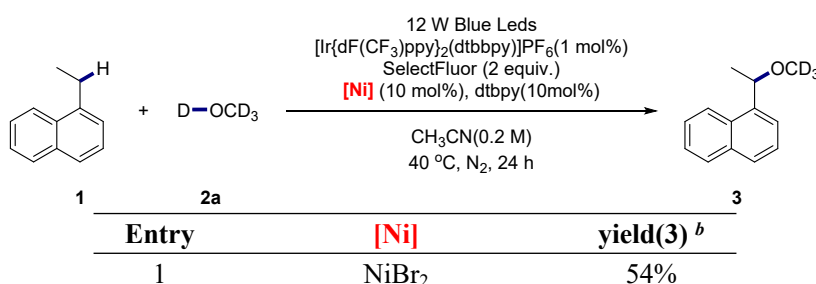

|   |                                                   |     |
|---|---------------------------------------------------|-----|
| 2 | NiBr <sub>2</sub> • dme                           | 40% |
| 3 | NiCl <sub>2</sub> • dme                           | 31% |
| 4 | Ni(OAc) <sub>2</sub> • 4H <sub>2</sub> O          | 32% |
| 5 | Ni(CF <sub>3</sub> SO <sub>3</sub> ) <sub>2</sub> | 11% |
| 6 | Ni(acac) <sub>2</sub>                             | 60% |
| 7 | Ni(cod) <sub>2</sub>                              | 40% |

<sup>a</sup> Conditions employed 12 W Blue Leds, **1** (0.5 mmol), **2a** (2.5 mmol), [Ir{dF(CF<sub>3</sub>)ppy}<sub>2</sub>(dtbbpy)]PF<sub>6</sub> (1 mol%), [Ni] (10 %mmol), dtbbpy (10 %mmol), Selectfluor (1.0 mmol), CH<sub>3</sub>CN (2.5 mL), the reaction mixture was degassed via freeze pump thaw (× 3 times) and refilled with N<sub>2</sub>, 40 °C, 24 h, unless otherwise noted; <sup>b</sup> Isolated yields were reported.

**Table S4.** The optimization of other metal salts. <sup>a</sup>

| Entry | [M]                                   | yield(3) <sup>b</sup> | yield(3') <sup>c</sup> |
|-------|---------------------------------------|-----------------------|------------------------|
| 1     | Ni(acac) <sub>2</sub>                 | 60%                   | -                      |
| 2     | CuBr <sub>2</sub>                     | 46%                   | 4%                     |
| 3     | Cu(acac) <sub>2</sub>                 | 40%                   | 3%                     |
| 4     | CuCl                                  | 51%                   | 4%                     |
| 5     | FeCl <sub>3</sub> • 4H <sub>2</sub> O | n.d. <sup>d</sup>     | 5%                     |
| 6     | CoCl <sub>2</sub>                     | n.d. <sup>d</sup>     | -                      |
| 7     | MnCl <sub>2</sub>                     | n.d. <sup>d</sup>     | 7%                     |

<sup>a</sup> Conditions employed 12 W Blue Leds, **1** (0.5 mmol), **2a** (2.5 mmol), [Ir{dF(CF<sub>3</sub>)ppy}<sub>2</sub>(dtbbpy)]PF<sub>6</sub> (1 mol%), [M] (10 %mmol), dtbbpy (10 %mmol), Selectfluor (1.0 mmol), CH<sub>3</sub>CN (2.5 mL), the reaction mixture was degassed via freeze pump thaw (× 3 times) and refilled with N<sub>2</sub>, 40 °C, 24 h, unless otherwise noted; <sup>b</sup> Isolated yields were reported; <sup>c</sup> Yields were determined by <sup>1</sup>H NMR using 1,3,5-trimethoxybenzene as an internal standard; <sup>d</sup> not detected.

**Table S5.** The optimization of the ligand. <sup>a</sup>

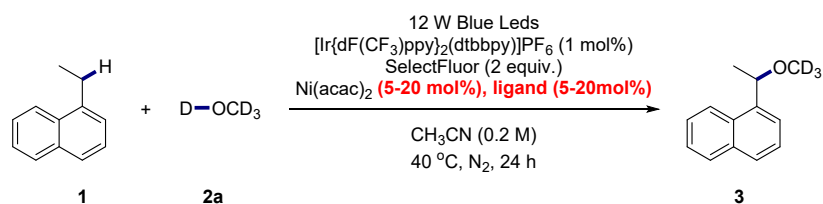



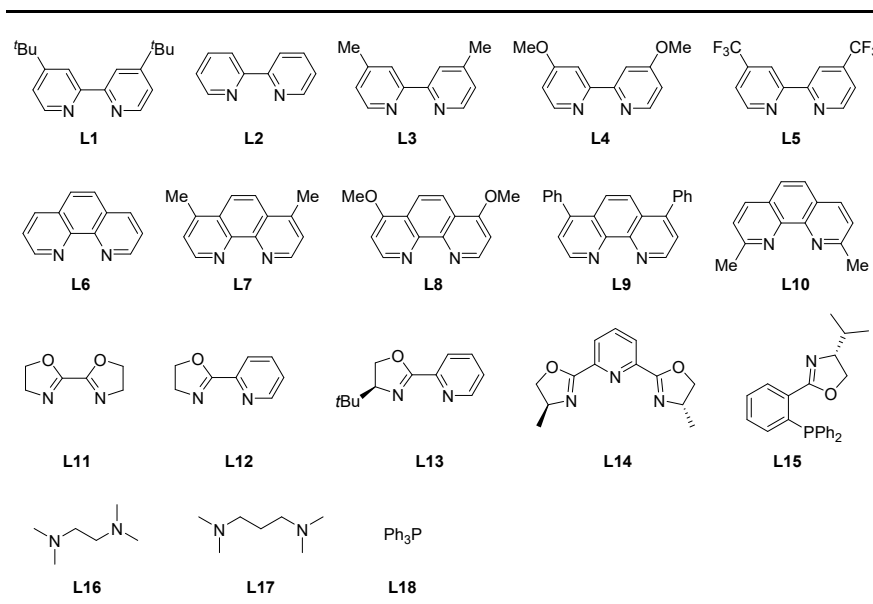

| Entry           | Ligands              | yield(3) <sup>b</sup> |
|-----------------|----------------------|-----------------------|
| 1               | <b>L1</b> (10 mol%)  | 60%                   |
| 2               | <b>L2</b> (10 mol%)  | 81%                   |
| 3               | <b>L3</b> (10 mol%)  | 73%                   |
| 4               | <b>L4</b> (10 mol%)  | 34%                   |
| 5               | <b>L5</b> (10 mol%)  | 40%                   |
| 6               | <b>L6</b> (10 mol%)  | 67%                   |
| 7               | <b>L7</b> (10 mol%)  | 56%                   |
| 8               | <b>L8</b> (10 mol%)  | 28%                   |
| 9               | <b>L9</b> (10 mol%)  | trace                 |
| 10              | <b>L10</b> (10 mol%) | trace                 |
| 11              | <b>L11</b> (10 mol%) | 67%                   |
| 12              | <b>L12</b> (10 mol%) | 33%                   |
| 13              | <b>L13</b> (10 mol%) | 21%                   |
| 14              | <b>L14</b> (10 mol%) | 21%                   |
| 15              | <b>L15</b> (10 mol%) | 71%                   |
| 16              | <b>L16</b> (10 mol%) | 40%                   |
| 17              | <b>L17</b> (10 mol%) | 27%                   |
| 18              | <b>L18</b> (10 mol%) | 54%                   |
| 19 <sup>c</sup> | <b>L2</b> (5 mol%)   | 69%                   |
| 20 <sup>d</sup> | <b>L2</b> (20 mol%)  | 75%                   |

<sup>a</sup> Conditions employed 12 W Blue Leds, **1** (0.5 mmol), **2a** (2.5 mmol), [Ir{dF(CF<sub>3</sub>)ppy}<sub>2</sub>(dtbbpy)]PF<sub>6</sub> (1 mol%), Ni(acac)<sub>2</sub> (10 %mmol), ligand (10 %mmol), Selectfluor (1.0 mmol), CH<sub>3</sub>CN (2.5 mL), the reaction mixture was degassed via freeze pump thaw (× 3 times) and refilled with N<sub>2</sub>, 40 °C, 24 h, unless otherwise noted; <sup>b</sup> Isolated yields were reported; <sup>c</sup> 0.025 mmol Ni(acac)<sub>2</sub> and 0.025 mmol bpy was used; <sup>d</sup> 0.1 mmol Ni(acac)<sub>2</sub> and 0.1 mmol bpy was used.

**Table S6.** The optimization of the solvent. <sup>a</sup>

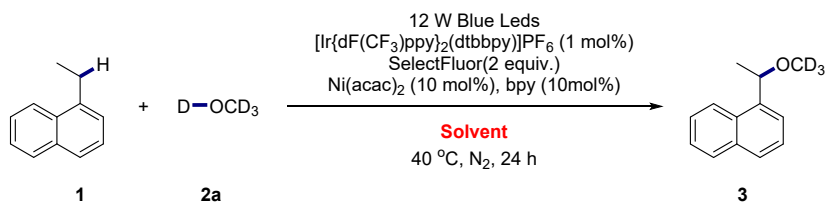

| Entry           | Solvents                  | yield(3) <sup>b</sup> |
|-----------------|---------------------------|-----------------------|
| 1               | CH <sub>3</sub> CN(0.2 M) | 81%                   |
| 2               | DCE(0.2 M)                | n.d. <sup>c</sup>     |
| 3               | DCM(0.2 M)                | 27%                   |
| 4               | DMF(0.2 M)                | n.d. <sup>c</sup>     |
| 5               | DMA(0.2 M)                | trace                 |
| 6               | DMSO(0.2 M)               | n.d. <sup>c</sup>     |
| 7               | EtOAc(0.2 M)              | n.d. <sup>c</sup>     |
| 8               | HFIP(0.2 M)               | n.d. <sup>c</sup>     |
| 9               | DCM:HFIP=4:1(0.2 M)       | n.d. <sup>c</sup>     |
| 10 <sup>d</sup> | CH <sub>3</sub> CN(0.1 M) | 61%                   |
| 11 <sup>e</sup> | CH <sub>3</sub> CN(0.4 M) | 71%                   |

<sup>a</sup> Conditions employed 12 W Blue Leds, **1** (0.5 mmol), **2a** (2.5 mmol), [Ir{dF(CF<sub>3</sub>)ppy}<sub>2</sub>(dtbbpy)]PF<sub>6</sub> (1 mol%), Ni(acac)<sub>2</sub> (10 %mmol), bpy (10 %mmol), Selectfluor (1.0 mmol), solvent (2.5 mL), the reaction mixture was degassed via freeze pump thaw (× 3 times) and refilled with N<sub>2</sub>, 40 °C, 24 h, unless otherwise noted; <sup>b</sup> Isolated yields were reported; <sup>c</sup> not detected; <sup>d</sup> 5 ml CH<sub>3</sub>CN was used; <sup>e</sup> 1.25 mmol CH<sub>3</sub>CN was used.

**Table S7.** The optimization of the amount of *d*<sup>4</sup>-MeOH. <sup>a</sup>

| Entry | <i>d</i> <sup>4</sup> -MeOH | yield(3) <sup>b</sup> | yield(4) <sup>c</sup> |
|-------|-----------------------------|-----------------------|-----------------------|
| 1     | 1 equiv.                    | 40%                   | 7%                    |
| 2     | 2 equiv.                    | 45%                   | 5%                    |
| 3     | 3 equiv.                    | 70%                   | 2%                    |
| 4     | 4 equiv.                    | 76%                   | -                     |
| 5     | 5 equiv.                    | 81%                   | -                     |
| 6     | 8 equiv.                    | 78%                   | -                     |
| 7     | 10 equiv.                   | 75%                   | -                     |

<sup>a</sup> Conditions employed 12 W Blue Leds, **1** (0.5 mmol), **2a** (0.5-5 mmol), [Ir{dF(CF<sub>3</sub>)ppy}<sub>2</sub>(dtbbpy)]PF<sub>6</sub> (1 mol%), Ni(acac)<sub>2</sub> (10 %mmol), bpy (10 %mmol), Selectfluor (1.0 mmol), CH<sub>3</sub>CN (2.5 mL), the reaction mixture was degassed via freeze pump thaw (× 3 times) and refilled with N<sub>2</sub>, 40 °C, 24 h, unless otherwise noted; <sup>b</sup> Isolated yields were reported; <sup>c</sup> Yields were determined by <sup>1</sup>H NMR using 1,3,5-trimethoxybenzene as an internal standard.

**Table S8.** Control Experiments. <sup>a</sup>

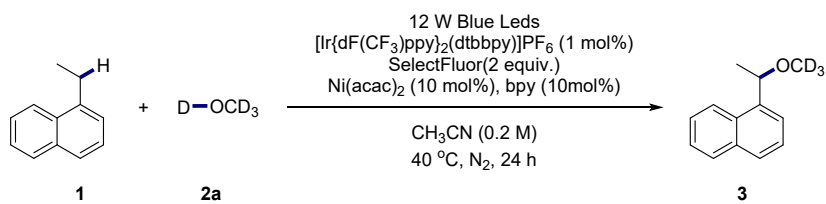

| Entry | Conditions               | yield(3) <sup>b</sup> |
|-------|--------------------------|-----------------------|
| 1     | Standard                 | 81%                   |
| 2     | No photocatalyst         | 14%                   |
| 3     | In darkness              | n.d. <sup>c</sup>     |
| 4     | No Selectfluor           | n.d. <sup>c</sup>     |
| 5     | No Ni(acac) <sub>2</sub> | n.d. <sup>c</sup>     |
| 6     | No bpy                   | 67%                   |
| 7     | Under air                | 30%                   |

<sup>a</sup> Conditions employed 12 W Blue Leds, **1** (0.5 mmol), **2a** (2.5 mmol), [Ir{dF(CF<sub>3</sub>)ppy}<sub>2</sub>(dtbbpy)]PF<sub>6</sub> (1 mol%), Ni(acac)<sub>2</sub> (10 %mmol), bpy (10 %mmol), Selectfluor (1.0 mmol), CH<sub>3</sub>CN (2.5 mL), the reaction mixture was degassed via freeze pump thaw (× 3 times) and refilled with N<sub>2</sub>, 40 °C, 24 h, unless otherwise noted; <sup>b</sup> Isolated yields were reported; <sup>c</sup> not detected.

## 2. The Study of the Mechanism of Photoredox/Nickel Dual-Catalyzed Benzylic C-H Alkoxylation

**Scheme S1.** The radical quenching and trapping experiments.

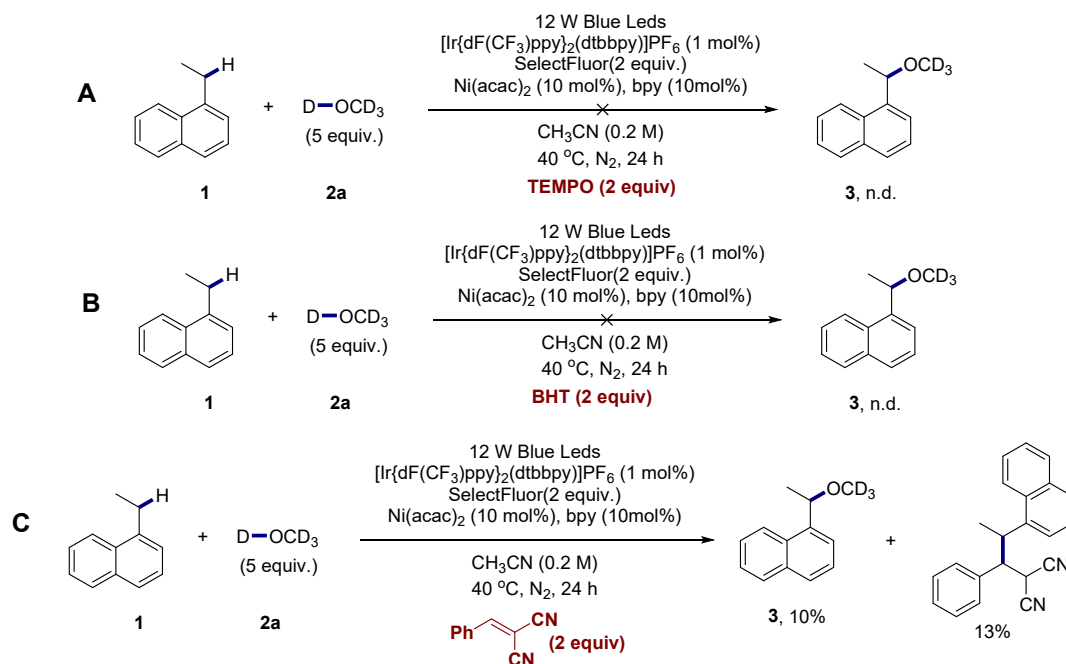

**Notes:** The reaction was completely inhibited by the presence of TEMPO and BHT, further suggesting the radical based mechanism (Scheme S1A, S1B). However, only the use of 2-benzylidenemalononitrile as additive is able to produce the radical trapping product accompanied with the formation of little target product **3** (Scheme S1C), the isolated yield of radical adduct product to benzylidenemalononitrile is 13%, and the radical adduct product is evaluated by <sup>1</sup>H-NMR and <sup>13</sup>C-NMR.

**Scheme S2.** The preliminary kinetic study of alkoxylation with MeOH and *d*<sup>4</sup>-MeOH <sup>a</sup>

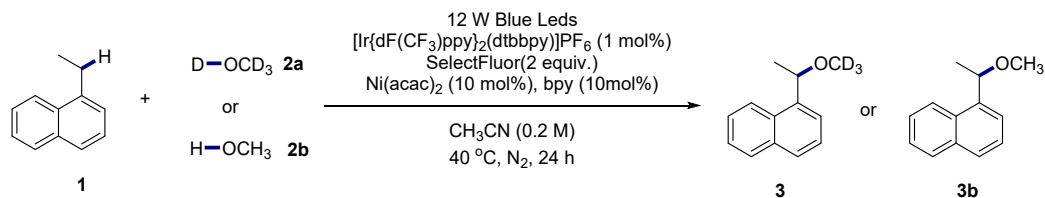

| Entry | Time (h) | Yield of <b>3</b> (%) <sup>b, c</sup> | Yield of <b>3b</b> (%) <sup>b, d</sup> |
|-------|----------|---------------------------------------|----------------------------------------|
| 1     | 2        | 36%                                   | 42%                                    |
| 2     | 4        | 44%                                   | 49%                                    |
| 3     | 8        | 56%                                   | 61%                                    |

|   |    |     |     |
|---|----|-----|-----|
| 4 | 16 | 72% | 76% |
| 5 | 20 | 75% | 79% |
| 6 | 24 | 81% | 82% |

<sup>a</sup> Conditions employed 12 W Blue Leds, **1** (0.5 mmol), **2a** or **2b** (2.5 mmol), [Ir{dF(CF<sub>3</sub>)ppy}<sub>2</sub>(dtbbpy)]PF<sub>6</sub> (1 mol%), Ni(acac)<sub>2</sub> (10 %mmol), bpy (10 %mmol), Selectfluor (1.0 mmol), CH<sub>3</sub>CN (2.5 mL), the reaction mixture was degassed via freeze pump thaw (× 3 times) and refilled with N<sub>2</sub>, 40 °C, unless otherwise noted; <sup>b</sup> Yields were determined by <sup>1</sup>H NMR using 1,3,5-trimethoxybenzene as an internal standard; <sup>c</sup> performed with *d*<sup>4</sup>-MeOH (2.5 mmol); <sup>d</sup> performed with MeOH (2.5 mmol).

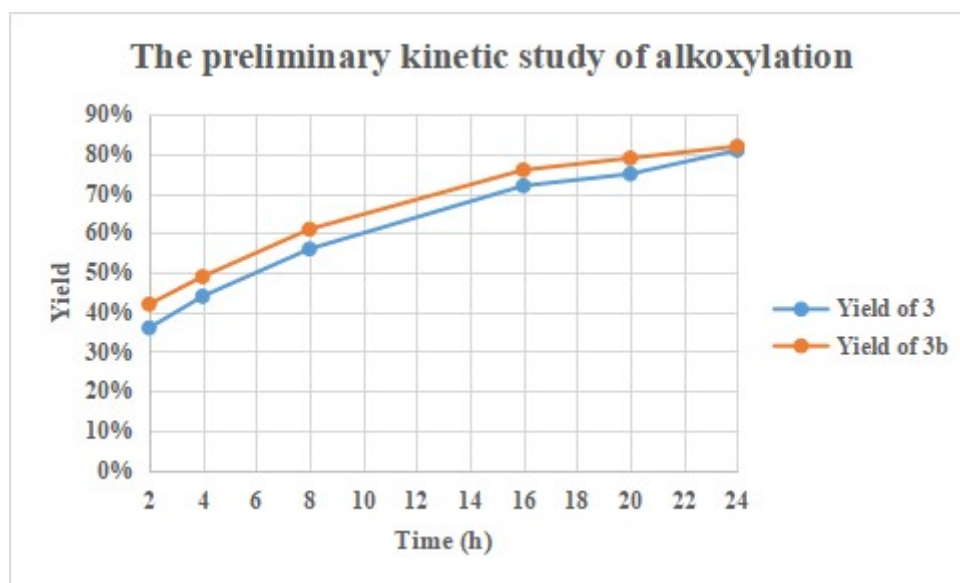

**Fig. S1** The preliminary kinetic study of alkoxylation with MeOH and *d*<sup>4</sup>-MeOH

**Scheme S3.** The kinetic isotopic effect determination from intermolecular competition reactions employing ethylbenzene and *d*<sup>10</sup>-ethylbenzene as coupling partner <sup>a</sup>

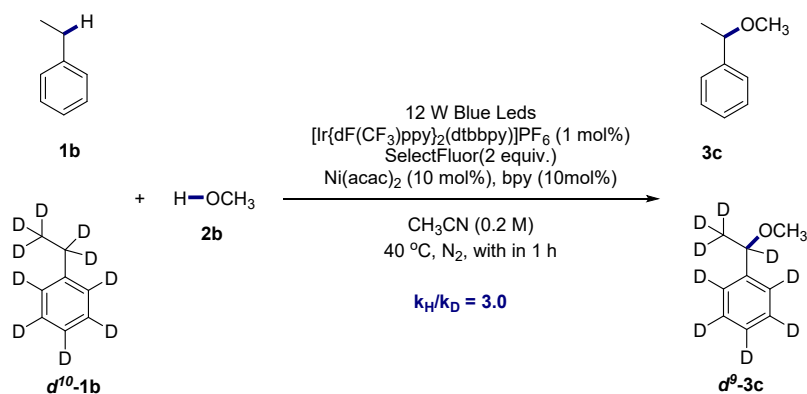

**Scheme S4.** The kinetic isotopic effect determination from two parallel reactions employing ethylbenzene and *d*<sup>10</sup>-ethylbenzene as coupling partner <sup>a</sup>

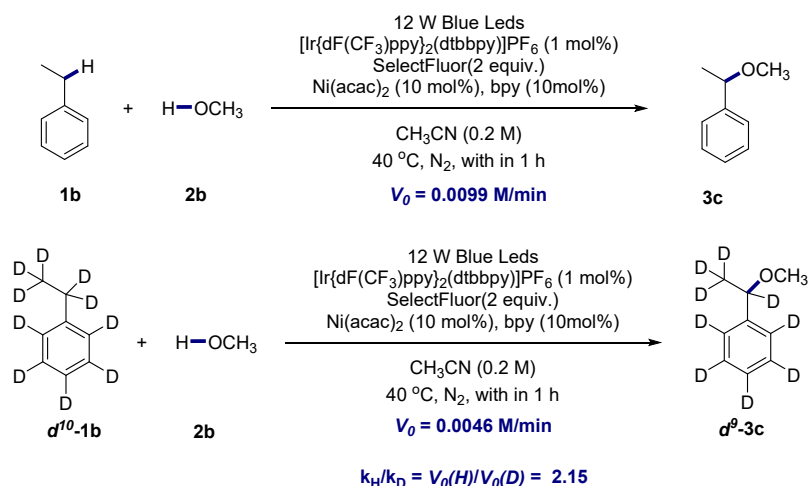

| Entry        | Time(min) | NMR Yield (%) <sup>b</sup> | [Product](M) | $V_0$       |
|--------------|-----------|----------------------------|--------------|-------------|
| ethylbenzene | 10        | 5                          | 0.01         | 0.0099M/min |
|              | 20        | 11                         | 0.022        |             |
|              | 30        | 15                         | 0.03         |             |
|              | 40        | 21                         | 0.042        |             |
|              | 50        | 25                         | 0.05         |             |
|              | 60        | 30                         | 0.06         |             |

| Entry                                | Time(min) | NMR Yield (%) | [Product](M) | $V_0$       |
|--------------------------------------|-----------|---------------|--------------|-------------|
| <i>d</i> <sup>10</sup> -ethylbenzene | 10        | 2             | 0.004        | 0.0046M/min |
|                                      | 20        | 5             | 0.01         |             |
|                                      | 30        | 7             | 0.014        |             |
|                                      | 40        | 9             | 0.018        |             |
|                                      | 50        | 11            | 0.022        |             |
|                                      | 60        | 14            | 0.028        |             |

<sup>a</sup> Conditions employed 12 W Blue Leds, ethylbenzene (or *d*<sup>10</sup>-ethylbenzene) (0.5 mmol), **2b** (2.5 mmol), [Ir{dF(CF<sub>3</sub>)ppy}<sub>2</sub>(dtbbpy)]PF<sub>6</sub> (1 mol%), Ni(acac)<sub>2</sub> (10 %mmol), bpy (10 %mmol), Selectfluor (1.0 mmol), CH<sub>3</sub>CN (2.5 mL), the reaction mixture was degassed via freeze pump thaw (× 3 times) and refilled with N<sub>2</sub>, 40 °C;

<sup>b</sup> Analyzed by NMR spectroscopy for the formation of product with 1,3,5-trimethoxybenzene as an internal standard.

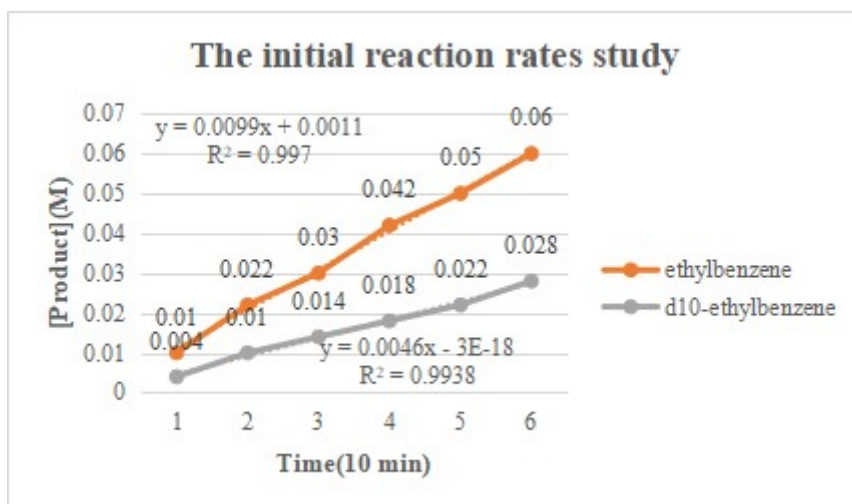

**Fig. S2** The initial rate study of ethylbenzene and  $d^{10}$ -ethylbenzene based coupling reaction with MeOH

**Scheme S5.** Competition experiments in 1-methylnaphthalene etherification and esterification

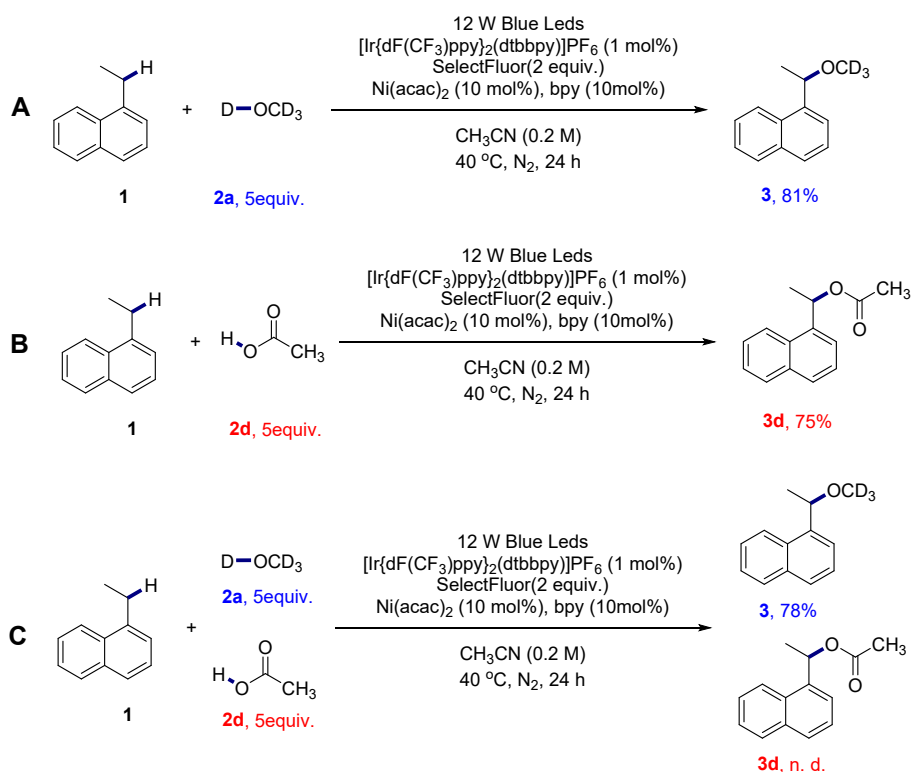

**Notes:** The competition experiments of  $d^4$ -MeOH **2a** and CH<sub>3</sub>COOH **2d** with 1-methylnaphthalene. This result further indicates that dialkoxyated Ni(II) species is more likely to intercept benzyl radical than diacetyloxyNi(II) species.

**Scheme S6.** Competition experiments in 1-methylnaphthalene etherification and fluorination

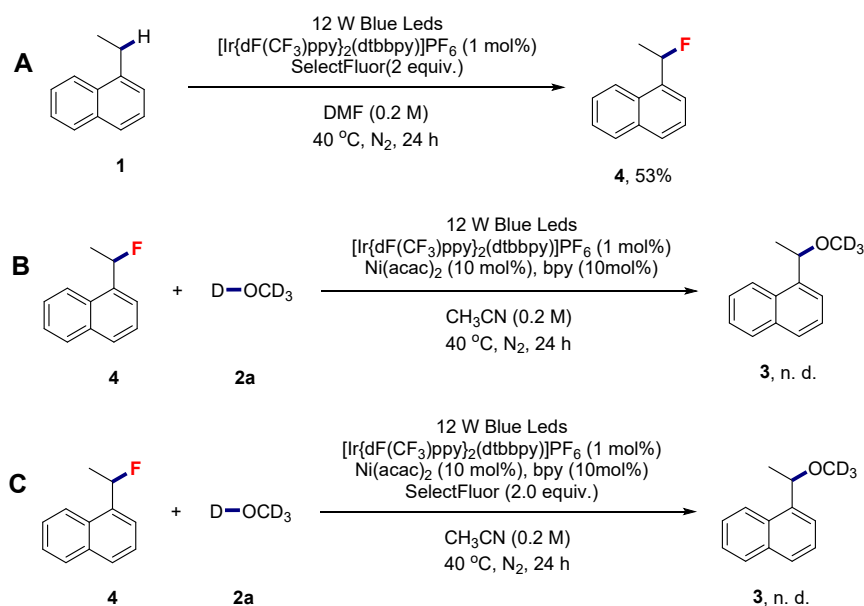

**Notes:** This result indicates that benzyl radical is more likely to be intercepted by dialkoxylated Ni(II) species than Selectfluor, and fluorination product **4** is not the intermediate of benzylic C-H alkoxylation.

**Scheme S7.** Emission Quenching Experiment

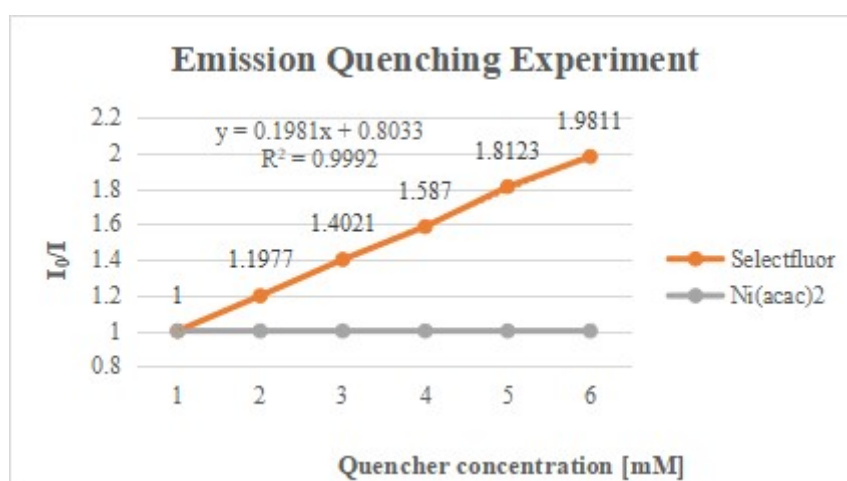

Emission intensities were recorded using a FluoroMax-4 (Horiba Scientific) fluorescence spectrophotometer. All  $[\text{Ir}\{\text{dF}(\text{CF}_3)\text{ppy}\}_2(\text{dtbbpy})]\text{PF}_6$  solutions were excited at 380 nm and the emission intensity was collected at 470 nm. In a typical experiment, to a  $1 \times 10^{-6}$  M solution of  $[\text{Ir}\{\text{dF}(\text{CF}_3)\text{ppy}\}_2(\text{dtbbpy})]\text{PF}_6$  in  $\text{CH}_3\text{CN}$  was added the appropriate amount of a quencher in a screw-top quartz cuvette.

**Scheme S8.** Unsuccessful substrates in benzylic C-H alkoxylation



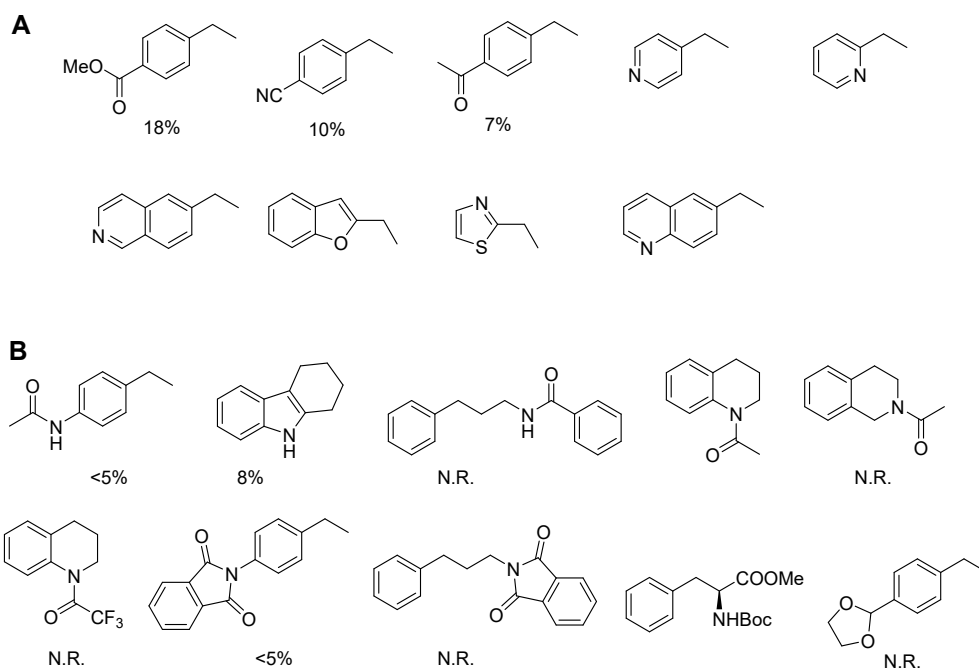

**Notes:** In our research, significant amount of fluorination products were observed with electron deficient aromatic substrates(Scheme S8A). Based on previous research, benzylic C-H derivatives with pyridine, quinoline, acetyl and ester are more likely to react directly with Selecfluor rather than alkoxylation.<sup>[1-4]</sup> Substrates with N-H groups, amide, imide and acetal suffered from low conversion, possibly reflecting inhibition by quenching (after hydrolysis) of reactive radicals(Scheme S8B).

### 3. Experiment Procedures and Product Characterization

Commercial reagents and solvents were used as received, unless otherwise stated. Organic solution was concentrated under reduced pressure on a IKA rotary evaporator using an alcohol bath. Analytical thin layer chromatography (TLC) was performed on 0.25 mm silica gel plates (Qingdao Haiyang Chemical China), and the compounds were visualized with a UV light at 254 nm. Further visualization was achieved by staining with  $\text{KMnO}_4$ . Flash chromatography was performed on silica gel 200-300 mesh (purchased from Qingdao Haiyang Chemical China) with commercial solvents (purchased from Energy Chemical® and Adamas-beta®). The  $^1\text{H}$  and  $^{13}\text{C}$  NMR spectra were recorded on a Bruker AVANCE III 400 Spectrometer (400 and 100 MHz for  $^1\text{H}$  and  $^{13}\text{C}$  NMR, respectively), Bruker AVANCE III 500 Spectrometer (500 and 125 MHz for  $^1\text{H}$  and  $^{13}\text{C}$  NMR, respectively), Bruker Ascend 600 Spectrometer (600 and 150 MHz for  $^1\text{H}$  and  $^{13}\text{C}$  NMR, respectively) and are internally referenced to residual solvent signals (note:  $\text{CDCl}_3$  referenced at 7.26 and 77.00 ppm in  $^1\text{H}$  and  $^{13}\text{C}$  NMR, respectively). Multiplicities were given as s (singlet), d (doublet), t (triplet), dd (double of doublet), quin (quintet) and m (multiplets). Coupling constants were reported in Hertz (Hz). Data for  $^{13}\text{C}$  NMR are reported in terms of chemical shift. High-resolution mass spectrometry (HRMS) was recorded on Waters LCT Premier XE spectrometer.

#### General Procedure :

To a 5 mL vial equipped with a Teflon septum and magnetic stir bar were added the corresponding benzylic substrate (if solid, 0.5 mmol, 1.0 equiv.), the corresponding alcohol (if solid, 2.5 mmol, 5.0 equiv.), Selectfluor (1.0 mmol, 2.0 equiv.),  $\text{Ni}(\text{acac})_2$  (0.05 mmol, 10 mol%), bpy (0.05 mmol, 10 mol%), and  $[\text{Ir}\{\text{dF}(\text{CF}_3)\text{ppy}\}_2(\text{dtbbpy})]\text{PF}_6$  (0.005 mmol, 1 mol%). The vial was sealed and placed under  $\text{N}_2$  atmosphere, then  $\text{CH}_3\text{CN}$  (2.5 mL, 0.2 M), benzylic substrate (if liquid, 0.5 mmol, 1.0 equiv.), alcohol (if liquid, 2.5 mmol, 5.0 equiv.) were added into the vial via injection through the cap, the reaction mixture was degassed via freeze pump thaw ( $\times 3$  times) and refilled with  $\text{N}_2$ . The sealed vial was placed in 12 W Blue Leds and irradiated for 24 hours. When the reaction finished, the reaction mixture was diluted with saturated  $\text{NaHCO}_3$  aqueous solution, extracted with ethyl acetate ( $3 \times 20$  mL), the combined organic extracts were washed with brine (30 mL), dried over anhydrous  $\text{Na}_2\text{SO}_4$  and concentrated in vacuo. Purification of the crude product by flash chromatography on silica gel using the indicated solvent system afforded the desired product.

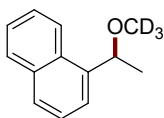

#### 1-(1-( $d^3$ -methoxy)ethyl)naphthalene (3):

According to the general procedure, 1-ethylnaphthalene (78 mg, 0.5 mmol, 1.0 equiv.),  $d^4$ -MeOH (90 mg, 2.5 mmol, 5.0 equiv.), Selectfluor (354 mg, 1.0 mmol, 2.0 equiv.),  $\text{Ni}(\text{acac})_2$  (12.9 mg, 0.05 mmol, 10 mol%), bpy (7.8 mg, 0.05 mmol, 10 mol%),  $[\text{Ir}\{\text{dF}(\text{CF}_3)\text{ppy}\}_2(\text{dtbbpy})]\text{PF}_6$  (5.6 mg, 0.005 mmol, 1 mol%) and 2.5 mL  $\text{CH}_3\text{CN}$  were used. After 24 hours, the reaction mixture was subjected to the workup protocol outlined in the general procedure and purified by flash chromatography (2 % ethyl acetate/petroleum ether) to provide the title compound as a colourless oil (77 mg, 81 % yield).

$^1\text{H}$  NMR (500 MHz,  $\text{CDCl}_3$ )  $\delta$  8.18 (d,  $J$  = 8.1 Hz, 1H), 7.89 (d,  $J$  = 7.6 Hz, 1H), 7.78 (d,  $J$  = 8.1 Hz, 1H), 7.57 (d,  $J$  = 7.0 Hz, 1H), 7.54 - 7.44 (m, 3H), 5.07 (q,  $J$  = 6.5 Hz, 1H), 1.62 (d,  $J$  = 6.6 Hz, 3H).  
 $^{13}\text{C}$  NMR (150 MHz,  $\text{CDCl}_3$ )  $\delta$  139.1, 133.9, 130.8, 128.9, 127.78, 125.8, 125.5, 125.4, 123.3, 123.2, 77.2, 55.7(quin,  $J$  = 21.0 Hz), 23.2.  
 HRMS (ESI) Calcd. for  $\text{C}_{13}\text{H}_{12}\text{D}_3\text{O}$   $[(\text{M}+\text{H})^+]$  190.1311, found 190.1315.

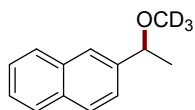

### 2-(1-( $d^3$ -methoxy)ethyl)naphthalene (5):

According to the general procedure, 2-ethylnaphthalene (78 mg, 0.5 mmol, 1.0 equiv.),  $d^4$ -MeOH (90 mg, 2.5 mmol, 5.0 equiv.), Selectfluor (354 mg, 1.0 mmol, 2.0 equiv.),  $\text{Ni}(\text{acac})_2$  (12.9 mg, 0.05 mmol, 10 mol%), bpy (7.8 mg, 0.05 mmol, 10 mol%),  $[\text{Ir}\{\text{dF}(\text{CF}_3)\text{ppy}\}_2(\text{dtbbpy})]\text{PF}_6$  (5.6 mg, 0.005 mmol, 1 mol%) and 2.5 mL  $\text{CH}_3\text{CN}$  were used. After 24 hours, the reaction mixture was subjected to the workup protocol outlined in the general procedure and purified by flash chromatography (2 % ethyl acetate/petroleum ether) to provide the title compound as a colourless oil (76 mg, 80 % yield).

$^1\text{H}$  NMR (500 MHz,  $\text{CDCl}_3$ )  $\delta$  7.87 - 7.81 (m, 3H), 7.74 (s, 1H), 7.51 - 7.43 (m, 3H), 4.47 (q,  $J$  = 6.5 Hz, 1H), 1.52 (d,  $J$  = 6.5 Hz, 3H).  
 $^{13}\text{C}$  NMR (150 MHz,  $\text{CDCl}_3$ )  $\delta$  140.9, 133.3, 133.0, 128.4, 127.8, 127.7, 126.1, 125.7, 125.1, 124.1, 79.7, 23.9.  
 HRMS (ESI) Calcd. for  $\text{C}_{13}\text{H}_{12}\text{D}_3\text{O}$   $[(\text{M}+\text{H})^+]$  190.1311, found 190.1317.

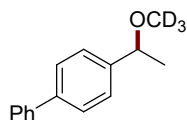

### 4-(1-( $d^3$ -methoxy)ethyl)-1,1'-biphenyl (6):

According to the general procedure, 4-ethyl-1,1'-biphenyl (91 mg, 0.5 mmol, 1.0 equiv.),  $d^4$ -MeOH (90 mg, 2.5 mmol, 5.0 equiv.), Selectfluor (354 mg, 1.0 mmol, 2.0 equiv.),  $\text{Ni}(\text{acac})_2$  (12.9 mg, 0.05 mmol, 10 mol%), bpy (7.8 mg, 0.05 mmol, 10 mol%),  $[\text{Ir}\{\text{dF}(\text{CF}_3)\text{ppy}\}_2(\text{dtbbpy})]\text{PF}_6$  (5.6 mg, 0.005 mmol, 1 mol%) and 2.5 mL  $\text{CH}_3\text{CN}$  were used. After 24 hours, the reaction mixture was subjected to the workup protocol outlined in the general procedure and purified by flash chromatography (2 % ethyl acetate/petroleum ether) to provide the title compound as a colourless oil (88 mg, 82 % yield).

$^1\text{H}$  NMR (400 MHz,  $\text{CDCl}_3$ )  $\delta$  7.57 - 7.46 (m, 4H), 7.35 (t,  $J$  = 7.6 Hz, 2H), 7.32 - 7.22 (m, 3H), 4.26 (q,  $J$  = 6.5 Hz, 1H), 1.39 (d,  $J$  = 6.5 Hz, 3H).  
 $^{13}\text{C}$  NMR (150 MHz,  $\text{CDCl}_3$ )  $\delta$  142.6, 140.9, 140.4, 128.7, 127.2, 127.0, 126.6, 79.2, 55.6 (quin,  $J$  = 21.5 Hz), 23.8.  
 HRMS (ESI) Calcd. for  $\text{C}_{15}\text{H}_{14}\text{D}_3\text{O}$   $[(\text{M}+\text{H})^+]$  216.1468, found 216.1473.

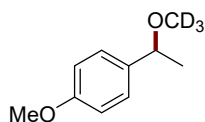

**1-methoxy-4-(1-(*d*<sup>3</sup>-methoxy)ethyl)benzene (7):**

According to the general procedure, 1-ethyl-4-methoxybenzene (68 mg, 0.5 mmol, 1.0 equiv.), *d*<sup>4</sup>-MeOH (90 mg, 2.5 mmol, 5.0 equiv.), Selectfluor (354 mg, 1.0 mmol, 2.0 equiv.), Ni(acac)<sub>2</sub> (12.9 mg, 0.05 mmol, 10 mol%), bpy (7.8 mg, 0.05 mmol, 10 mol%), [Ir{dF(CF<sub>3</sub>)ppy}<sub>2</sub>(dtbbpy)]PF<sub>6</sub> (5.6 mg, 0.005 mmol, 1 mol%) and 2.5 mL CH<sub>3</sub>CN were used. After 24 hours, the reaction mixture was subjected to the workup protocol outlined in the general procedure and purified by flash chromatography (2 % ethyl acetate/petroleum ether) to provide the title compound as a colourless oil (63 mg, 75 % yield).

<sup>1</sup>H NMR (400 MHz, CDCl<sub>3</sub>) δ 7.16 (d, *J* = 8.4 Hz, 2H), 6.82 (d, *J* = 8.4 Hz, 2H), 4.18 (q, *J* = 6.4 Hz, 1H), 3.74 (s, 3H), 1.35 (d, *J* = 6.4 Hz, 3H).

<sup>13</sup>C NMR (150 MHz, CDCl<sub>3</sub>) δ 159.0, 135.6, 127.4, 113.8, 79.0, 55.3, 23.8.

HRMS (ESI) Calcd. for C<sub>10</sub>H<sub>12</sub>D<sub>3</sub>O<sub>2</sub> [(M+H)<sup>+</sup>] 170.1260, found 170.1265.

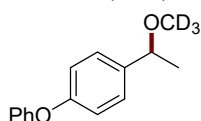**1-(1-(*d*<sup>3</sup>-methoxy)ethyl)-4-phenoxybenzene (8):**

According to the general procedure, 1-ethyl-4-phenoxybenzene (99 mg, 0.5 mmol, 1.0 equiv.), *d*<sup>4</sup>-MeOH (90 mg, 2.5 mmol, 5.0 equiv.), Selectfluor (354 mg, 1.0 mmol, 2.0 equiv.), Ni(acac)<sub>2</sub> (12.9 mg, 0.05 mmol, 10 mol%), bpy (7.8 mg, 0.05 mmol, 10 mol%), [Ir{dF(CF<sub>3</sub>)ppy}<sub>2</sub>(dtbbpy)]PF<sub>6</sub> (5.6 mg, 0.005 mmol, 1 mol%) and 2.5 mL CH<sub>3</sub>CN were used. After 24 hours, the reaction mixture was subjected to the workup protocol outlined in the general procedure and purified by flash chromatography (5 % ethyl acetate/petroleum ether) to provide the title compound as a colourless oil (90 mg, 78 % yield).

<sup>1</sup>H NMR (400 MHz, CDCl<sub>3</sub>) δ 7.26 (t, *J* = 7.9 Hz, 2H), 7.22 - 7.18 (m, 2H), 7.02 (t, *J* = 7.4 Hz, 1H), 6.93 (dd, *J* = 11.5, 8.3 Hz, 4H), 4.21 (q, *J* = 6.4 Hz, 1H), 1.36 (d, *J* = 6.4 Hz, 3H).

<sup>13</sup>C NMR (100 MHz, CDCl<sub>3</sub>) δ 157.2, 156.6, 138.3, 129.7, 127.6, 123.2, 118.9, 118.7, 79.0, 23.7.

HRMS (ESI) Calcd. for C<sub>15</sub>H<sub>14</sub>D<sub>3</sub>O<sub>2</sub> [(M+H)<sup>+</sup>] 232.1432, found 232.1434.

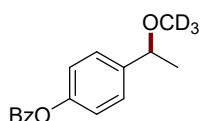**4-(1-(*d*<sup>3</sup>-methoxy)ethyl)phenyl benzoate (9):**

According to the general procedure, 4-ethylphenyl benzoate [<sup>5</sup>] (113 mg, 0.5 mmol, 1.0 equiv.), *d*<sup>4</sup>-MeOH (90 mg, 2.5 mmol, 5.0 equiv.), Selectfluor (354 mg, 1.0 mmol, 2.0 equiv.), Ni(acac)<sub>2</sub> (12.9 mg, 0.05 mmol, 10 mol%), bpy (7.8 mg, 0.05 mmol, 10 mol%), [Ir{dF(CF<sub>3</sub>)ppy}<sub>2</sub>(dtbbpy)]PF<sub>6</sub> (5.6 mg, 0.005 mmol, 1 mol%) and 2.5 mL CH<sub>3</sub>CN were used. After 24 hours, the reaction mixture was subjected to the workup protocol outlined in the general procedure and purified by flash chromatography (2 % ethyl acetate/petroleum ether) to provide the title compound as a colourless oil (100 mg, 77 % yield).

<sup>1</sup>H NMR (400 MHz, CDCl<sub>3</sub>) δ 8.13 (d, *J* = 8.1 Hz, 2H), 7.61 - 7.52 (m, 1H), 7.43 (dd, *J* = 11.2, 4.1 Hz, 2H), 7.34 - 7.25 (m, 2H), 7.16 - 7.06 (m, 2H), 4.25 (q, *J* = 6.4 Hz, 1H), 1.37 (d, *J* = 6.4 Hz, 3H).

$^{13}\text{C}$  NMR (100 MHz,  $\text{CDCl}_3$ )  $\delta$  165.2, 150.1, 141.2, 133.6, 130.1, 129.5, 128.5, 127.2, 121.6, 79.0, 23.9.

HRMS (ESI) Calcd. for  $\text{C}_{16}\text{H}_{14}\text{D}_3\text{O}_3$   $[(\text{M}+\text{H})^+]$  260.1366, found 260.1369.

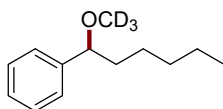

### (1-( $d^3$ -methoxy)hexyl)benzene (10):

According to the general procedure, hexylbenzene (81 mg, 0.5 mmol, 1.0 equiv.),  $d^4$ -MeOH (90 mg, 2.5 mmol, 5.0 equiv.), Selectfluor (354 mg, 1.0 mmol, 2.0 equiv.),  $\text{Ni}(\text{acac})_2$  (12.9 mg, 0.05 mmol, 10 mol%), bpy (7.8 mg, 0.05 mmol, 10 mol%),  $[\text{Ir}\{\text{dF}(\text{CF}_3)\text{ppy}\}_2(\text{dtbbpy})]\text{PF}_6$  (5.6 mg, 0.005 mmol, 1 mol%) and 2.5 mL  $\text{CH}_3\text{CN}$  were used. After 24 hours, the reaction mixture was subjected to the workup protocol outlined in the general procedure and purified by flash chromatography (2 % ethyl acetate/petroleum ether) to provide the title compound as a colourless oil (70 mg, 72 % yield).

$^1\text{H}$  NMR (400 MHz,  $\text{CDCl}_3$ )  $\delta$  7.33 - 7.24 (m, 2H), 7.21 (d,  $J = 7.1$  Hz, 3H), 4.00 (t,  $J = 6.6$  Hz, 1H), 1.80 - 1.66 (m, 1H), 1.59 - 1.52 (m, 1H), 1.37 - 1.28 (m, 1H), 1.25 - 1.13 (m, 6H), 0.78 (t,  $J = 6.1$  Hz, 3H).

$^{13}\text{C}$  NMR (150 MHz,  $\text{CDCl}_3$ )  $\delta$  142.6, 128.3, 127.4, 126.7, 84.0, 55.7 (quin,  $J = 21.3$  Hz), 38.2, 31.8, 25.5, 22.6, 14.0.

HRMS (ESI) Calcd. for  $\text{C}_{13}\text{H}_{18}\text{D}_3\text{O}$   $[(\text{M}+\text{H})^+]$  196.1781, found 196.1790.

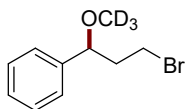

### (3-bromo-1-( $d^3$ -methoxy)propyl)benzene (11):

According to the general procedure, (3-bromopropyl)benzene (100 mg, 0.5 mmol, 1.0 equiv.),  $d^4$ -MeOH (90 mg, 2.5 mmol, 5.0 equiv.), Selectfluor (354 mg, 1.0 mmol, 2.0 equiv.),  $\text{Ni}(\text{acac})_2$  (12.9 mg, 0.05 mmol, 10 mol%), bpy (7.8 mg, 0.05 mmol, 10 mol%),  $[\text{Ir}\{\text{dF}(\text{CF}_3)\text{ppy}\}_2(\text{dtbbpy})]\text{PF}_6$  (5.6 mg, 0.005 mmol, 1 mol%) and 2.5 mL  $\text{CH}_3\text{CN}$  were used. After 24 hours, the reaction mixture was subjected to the workup protocol outlined in the general procedure and purified by flash chromatography (2 % ethyl acetate/petroleum ether) to provide the title compound as a colourless oil (65 mg, 56 % yield).

$^1\text{H}$  NMR (400 MHz,  $\text{CDCl}_3$ )  $\delta$  7.34 - 7.27 (m, 2H), 7.26 - 7.20 (m, 3H), 4.28 (dd,  $J = 8.2, 4.9$  Hz, 1H), 3.49 (dd,  $J = 15.4, 8.5$  Hz, 1H), 3.37 - 3.23 (m, 1H), 2.30 - 2.19 (m, 1H), 2.08 - 1.97 (m, 1H).

$^{13}\text{C}$  NMR (150 MHz,  $\text{CDCl}_3$ )  $\delta$  141.1, 128.6, 127.9, 126.6, 81.3, 56.0 (quin,  $J = 21.5$  Hz), 41.1, 30.3.

HRMS (ESI) Calcd. for  $\text{C}_{10}\text{H}_{11}\text{D}_3\text{BrO}$   $[(\text{M}+\text{H})^+]$  232.0416, found 232.0424.

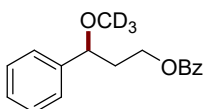

### 3-( $d^3$ -methoxy)-3-phenylpropyl benzoate (12):

According to the general procedure, 3-phenylpropyl benzoate <sup>[6]</sup> (120 mg, 0.5 mmol, 1.0 equiv.),  $d^4$ -MeOH (90 mg, 2.5 mmol, 5.0 equiv.), Selectfluor (354 mg, 1.0 mmol, 2.0 equiv.),  $\text{Ni}(\text{acac})_2$  (12.9 mg, 0.05 mmol, 10 mol%), bpy (7.8 mg, 0.05 mmol, 10 mol%),  $[\text{Ir}\{\text{dF}(\text{CF}_3)\text{ppy}\}_2(\text{dtbbpy})]\text{PF}_6$  (5.6 mg, 0.005 mmol, 1 mol%) and 2.5 mL  $\text{CH}_3\text{CN}$  were used. After 24 hours, the reaction mixture was

subjected to the workup protocol outlined in the general procedure and purified by flash chromatography (2 % ethyl acetate/petroleum ether) to provide the title compound as a colourless oil (89 mg, 65 % yield).

$^1\text{H}$  NMR (400 MHz,  $\text{CDCl}_3$ )  $\delta$  7.94 (d,  $J = 7.5$  Hz, 2H), 7.48 (t,  $J = 7.4$  Hz, 1H), 7.36 (t,  $J = 7.6$  Hz, 2H), 7.32 - 7.14 (m, 5H), 4.42 - 4.33 (m, 1H), 4.30 - 4.20 (m, 2H), 2.24 - 2.13 (m, 1H), 2.07 - 1.96 (m, 1H).

$^{13}\text{C}$  NMR (150 MHz,  $\text{CDCl}_3$ )  $\delta$  166.5, 141.5, 132.9, 130.4, 129.6, 128.6, 128.4, 127.9, 126.6, 80.7, 62.0, 55.9 (quin,  $J = 21.4$  Hz), 37.30.

HRMS (ESI) Calcd. for  $\text{C}_{17}\text{H}_{16}\text{D}_3\text{O}_3$   $[(\text{M}+\text{H})^+]$  274.1522, found 274.1528.

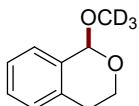

### 1-( $d^3$ -methoxy)isochromane (13):

According to the general procedure, isochromane (67 mg, 0.5 mmol, 1.0 equiv.),  $d^4$ -MeOH (90 mg, 2.5 mmol, 5.0 equiv.), Selectfluor (354 mg, 1.0 mmol, 2.0 equiv.),  $\text{Ni}(\text{acac})_2$  (12.9 mg, 0.05 mmol, 10 mol%), bpy (7.8 mg, 0.05 mmol, 10 mol%),  $[\text{Ir}\{\text{dF}(\text{CF}_3)\text{ppy}\}_2(\text{dtbbpy})]\text{PF}_6$  (5.6 mg, 0.005 mmol, 1 mol%) and 2.5 mL  $\text{CH}_3\text{CN}$  were used. After 24 hours, the reaction mixture was subjected to the workup protocol outlined in the general procedure and purified by flash chromatography (2 % ethyl acetate/petroleum ether) to provide the title compound as a colourless oil (71 mg, 85 % yield).

$^1\text{H}$  NMR (400 MHz,  $\text{CDCl}_3$ )  $\delta$  7.21 - 7.11 (m, 3H), 7.05 (d,  $J = 7.2$  Hz, 1H), 5.38 (s, 1H), 4.11 - 4.00 (m, 1H), 3.89 - 3.79 (m, 1H), 3.03 - 2.90 (m, 1H), 2.60 - 2.52 (m, 1H).

$^{13}\text{C}$  NMR (100 MHz,  $\text{CDCl}_3$ )  $\delta$  134.1, 134.0, 128.5, 128.2, 127.4, 126.4, 97.7, 57.8, 28.0.

HRMS (ESI) Calcd. for  $\text{C}_{10}\text{H}_{10}\text{D}_3\text{O}_2$   $[(\text{M}+\text{H})^+]$  168.1104, found 168.1108.

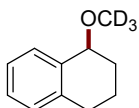

### 1-( $d^3$ -methoxy)-1,2,3,4-tetrahydronaphthalene (14):

According to the general procedure, 1,2,3,4-tetrahydronaphthalene (66 mg, 0.5 mmol, 1.0 equiv.),  $d^4$ -MeOH (90 mg, 2.5 mmol, 5.0 equiv.), Selectfluor (354 mg, 1.0 mmol, 2.0 equiv.),  $\text{Ni}(\text{acac})_2$  (12.9 mg, 0.05 mmol, 10 mol%), bpy (7.8 mg, 0.05 mmol, 10 mol%),  $[\text{Ir}\{\text{dF}(\text{CF}_3)\text{ppy}\}_2(\text{dtbbpy})]\text{PF}_6$  (5.6 mg, 0.005 mmol, 1 mol%) and 2.5 mL  $\text{CH}_3\text{CN}$  were used. After 24 hours, the reaction mixture was subjected to the workup protocol outlined in the general procedure and purified by flash chromatography (2 % ethyl acetate/petroleum ether) to provide the title compound as a colourless oil (58 mg, 70 % yield).

$^1\text{H}$  NMR (400 MHz,  $\text{CDCl}_3$ )  $\delta$  7.32 - 7.24 (m, 1H), 7.15 - 7.06 (m, 2H), 7.06 - 6.98 (m, 1H), 4.24 (t,  $J = 4.6$  Hz, 1H), 2.80 - 2.70 (m, 1H), 2.70 - 2.57 (m, 1H), 2.00 - 1.87 (m, 2H), 1.86 - 1.74 (m, 1H), 1.73 - 1.58 (m, 1H).

$^{13}\text{C}$  NMR (100 MHz,  $\text{CDCl}_3$ )  $\delta$  137.5, 136.6, 129.3, 129.0, 127.5, 125.7, 29.1, 27.4, 18.7.

HRMS (ESI) Calcd. for  $\text{C}_{11}\text{H}_{12}\text{D}_3\text{O}$   $[(\text{M}+\text{H})^+]$  166.1311, found 166.1317.

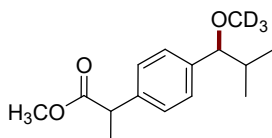

**methyl 2-(4-(1-(*d*<sup>3</sup>-methoxy)-2-methylpropyl)phenyl)propanoate (15):**

According to the general procedure, methyl 2-(4-isobutylphenyl)propanoate <sup>[7]</sup> (110 mg, 0.5 mmol, 1.0 equiv.), *d*<sup>4</sup>-MeOH (90 mg, 2.5 mmol, 5.0 equiv.), Selectfluor (354 mg, 1.0 mmol, 2.0 equiv.), Ni(acac)<sub>2</sub> (12.9 mg, 0.05 mmol, 10 mol%), bpy (7.8 mg, 0.05 mmol, 10 mol%), [Ir{dF(CF<sub>3</sub>)ppy}<sub>2</sub>(dtbbpy)]PF<sub>6</sub> (5.6 mg, 0.005 mmol, 1 mol%) and 2.5 mL CH<sub>3</sub>CN were used. After 24 hours, the reaction mixture was subjected to the workup protocol outlined in the general procedure and purified by flash chromatography (10 % ethyl acetate/petroleum ether) to provide the title compound as a colourless oil (89 mg, 70 % yield).

<sup>1</sup>H NMR (400 MHz, CDCl<sub>3</sub>) δ 7.19 (d, *J* = 7.9 Hz, 2H), 7.12 (d, *J* = 8.0 Hz, 2H), 3.66 (dd, *J* = 6.7, 4.7 Hz, 2H), 3.60 (s, 3H), 1.87 -1.76 (m, 1H), 1.43 (d, *J* = 7.2 Hz, 3H), 0.90 (d, *J* = 6.6 Hz, 3H), 0.66 (d, *J* = 6.8 Hz, 3H).

<sup>13</sup>C NMR (150 MHz, CDCl<sub>3</sub>) δ 175.2, 140.0, 139.4, 127.7, 127.1, 89.3, 56.2 (quin, *J* = 21.2 Hz), 52.0, 45.1, 34.7, 19.0, 18.9, 18.6.

HRMS (ESI) Calcd. for C<sub>15</sub>H<sub>20</sub>D<sub>3</sub>O<sub>3</sub> [(M+H)<sup>+</sup>] 254.1835, found 254.1837.

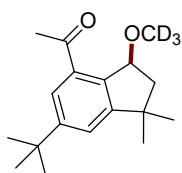

**1-(6-(*tert*-butyl)-3-(*d*<sup>3</sup>-methoxy)-1,1-dimethyl-2,3-dihydro-1*H*-inden-4-yl)ethan-1-one (16):**

According to the general procedure, 1-(6-(*tert*-butyl)-1,1-dimethyl-2,3-dihydro-1*H*-inden-4-yl)ethan-1-one (122 mg, 0.5 mmol, 1.0 equiv.), *d*<sup>4</sup>-MeOH (90 mg, 2.5 mmol, 5.0 equiv.), Selectfluor (354 mg, 1.0 mmol, 2.0 equiv.), Ni(acac)<sub>2</sub> (12.9 mg, 0.05 mmol, 10 mol%), bpy (7.8 mg, 0.05 mmol, 10 mol%), [Ir{dF(CF<sub>3</sub>)ppy}<sub>2</sub>(dtbbpy)]PF<sub>6</sub> (5.6 mg, 0.005 mmol, 1 mol%) and 2.5 mL CH<sub>3</sub>CN were used. After 24 hours, the reaction mixture was subjected to the workup protocol outlined in the general procedure and purified by flash chromatography (10 % ethyl acetate/petroleum ether) to provide the title compound as a colourless oil (100 mg, 79 % yield).

<sup>1</sup>H NMR (400 MHz, CDCl<sub>3</sub>) δ 7.59 (d, *J* = 1.7 Hz, 1H), 7.28 (d, *J* = 1.7 Hz, 1H), 5.14 (dd, *J* = 5.5, 3.3 Hz, 1H), 2.55 (s, 3H), 2.01 (dd, *J* = 4.3, 2.8 Hz, 2H), 1.28 (s, 3H), 1.27 (s, 9H), 1.23 (s, 3H).

<sup>13</sup>C NMR (100 MHz, CDCl<sub>3</sub>) δ 200.8, 154.2, 152.6, 137.8, 135.2, 125.0, 123.2, 81.5, 46.1, 42.6, 34.9, 31.4, 31.2, 29.7, 28.7.

HRMS (ESI) Calcd. for C<sub>18</sub>H<sub>24</sub>D<sub>3</sub>O<sub>2</sub> [(M+H)<sup>+</sup>] 278.2199, found 278.2202.

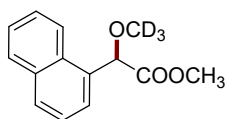

**methyl 2-(*d*<sup>3</sup>-methoxy)-2-(naphthalen-1-yl)acetate (17):**

According to the general procedure, methyl 2-(naphthalen-1-yl)acetate <sup>[7]</sup> (100 mg, 0.5 mmol, 1.0 equiv.), *d*<sup>4</sup>-MeOH (90 mg, 2.5 mmol, 5.0 equiv.), Selectfluor (354 mg, 1.0 mmol, 2.0 equiv.),



Ni(acac)<sub>2</sub> (12.9 mg, 0.05 mmol, 10 mol%), bpy (7.8 mg, 0.05 mmol, 10 mol%), [Ir{dF(CF<sub>3</sub>)ppy}<sub>2</sub>(dtbbpy)]PF<sub>6</sub> (5.6 mg, 0.005 mmol, 1 mol%) and 2.5 mL CH<sub>3</sub>CN were used. After 24 hours, the reaction mixture was subjected to the workup protocol outlined in the general procedure and purified by flash chromatography (10 % ethyl acetate/petroleum ether) to provide the title compound as a colourless oil (99 mg, 85 % yield).

<sup>1</sup>H NMR (400 MHz, CDCl<sub>3</sub>) δ 8.31 (d, *J* = 8.3 Hz, 1H), 7.89 (t, *J* = 7.5 Hz, 2H), 7.64 (d, *J* = 7.0 Hz, 1H), 7.61 - 7.47 (m, 3H), 5.42 (s, 1H), 3.71 (s, 3H).

<sup>13</sup>C NMR (100 MHz, CDCl<sub>3</sub>) δ 171.3, 133.9, 132.0, 131.0, 129.5, 128.7, 126.8, 126.6, 125.9, 125.2, 123.9, 81.03, 52.3.

HRMS (ESI) Calcd. for C<sub>14</sub>H<sub>12</sub>D<sub>3</sub>O<sub>3</sub> [(M+H)<sup>+</sup>] 234.1209, found 234.1216.

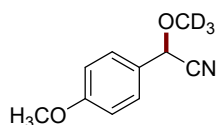

### 2-(*d*<sup>3</sup>-methoxy)-2-(4-methoxyphenyl)acetonitrile (18):

According to the general procedure, 2-(4-methoxyphenyl)acetonitrile (74 mg, 0.5 mmol, 1.0 equiv.), *d*<sup>4</sup>-MeOH (90 mg, 2.5 mmol, 5.0 equiv.), Selectfluor (354 mg, 1.0 mmol, 2.0 equiv.), Ni(acac)<sub>2</sub> (12.9 mg, 0.05 mmol, 10 mol%), bpy (7.8 mg, 0.05 mmol, 10 mol%), [Ir{dF(CF<sub>3</sub>)ppy}<sub>2</sub>(dtbbpy)]PF<sub>6</sub> (5.6 mg, 0.005 mmol, 1 mol%) and 2.5 mL CH<sub>3</sub>CN were used. After 24 hours, the reaction mixture was subjected to the workup protocol outlined in the general procedure and purified by flash chromatography (2 % ethyl acetate/petroleum ether) to provide the title compound as a colourless oil (74 mg, 82 % yield).

<sup>1</sup>H NMR (400 MHz, CDCl<sub>3</sub>) δ 7.41 (d, *J* = 8.7 Hz, 2H), 6.94 (d, *J* = 8.7 Hz, 2H), 5.14 (s, 1H), 3.83 (s, 3H).

<sup>13</sup>C NMR (100 MHz, CDCl<sub>3</sub>) δ 160.8, 128.9, 125.4, 117.2, 114.4, 71.8, 55.4.

HRMS (ESI) Calcd. for C<sub>10</sub>H<sub>9</sub>D<sub>3</sub>NO<sub>2</sub> [(M+H)<sup>+</sup>] 181.1056, found 181.1063.

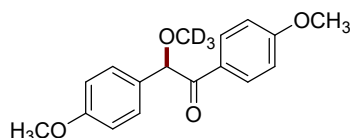

### 2-(*d*<sup>3</sup>-methoxy)-1,2-bis(4-methoxyphenyl)ethan-1-one (19):

According to the general procedure, 1,2-bis(4-methoxyphenyl)ethan-1-one (128 mg, 0.5 mmol, 1.0 equiv.), *d*<sup>4</sup>-MeOH (90 mg, 2.5 mmol, 5.0 equiv.), Selectfluor (354 mg, 1.0 mmol, 2.0 equiv.), Ni(acac)<sub>2</sub> (12.9 mg, 0.05 mmol, 10 mol%), bpy (7.8 mg, 0.05 mmol, 10 mol%), [Ir{dF(CF<sub>3</sub>)ppy}<sub>2</sub>(dtbbpy)]PF<sub>6</sub> (5.6 mg, 0.005 mmol, 1 mol%) and 2.5 mL CH<sub>3</sub>CN were used. After 24 hours, the reaction mixture was subjected to the workup protocol outlined in the general procedure and purified by flash chromatography (20 % ethyl acetate/petroleum ether) to provide the title compound as a colourless oil (106 mg, 73 % yield).

<sup>1</sup>H NMR (400 MHz, CDCl<sub>3</sub>) δ 7.98 (d, *J* = 8.9 Hz, 2H), 7.36 (d, *J* = 8.7 Hz, 2H), 6.86 (dd, *J* = 8.9, 2.4 Hz, 4H), 5.44 (s, 1H), 3.82 (s, 3H), 3.76 (s, 3H).

<sup>13</sup>C NMR (100 MHz, CDCl<sub>3</sub>) δ 195.6, 163.5, 159.7, 131.34, 129.0, 128.5, 128.0, 114.3, 113.7, 85.7, 55.4, 55.3.



HRMS (ESI) Calcd. for  $C_{17}H_{16}D_3O_4$   $[(M+H)^+]$  290.1472, found 290.1478.

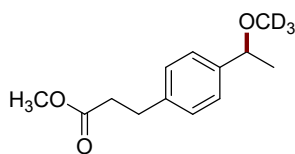

**methyl 3-(4-(1-( $d^3$ -methoxy)ethyl)phenyl)propanoate (20):**

According to the general procedure, methyl 3-(4-ethylphenyl)propanoate <sup>[7]</sup> (96 mg, 0.5 mmol, 1.0 equiv.),  $d^4$ -MeOH (90 mg, 2.5 mmol, 5.0 equiv.), Selectfluor (354 mg, 1.0 mmol, 2.0 equiv.),  $Ni(acac)_2$  (12.9 mg, 0.05 mmol, 10 mol%), bpy (7.8 mg, 0.05 mmol, 10 mol%),  $[Ir\{dF(CF_3)ppy\}_2(dtbbpy)]PF_6$  (5.6 mg, 0.005 mmol, 1 mol%) and 2.5 mL  $CH_3CN$  were used. After 24 hours, the reaction mixture was subjected to the workup protocol outlined in the general procedure and purified by flash chromatography (10 % ethyl acetate/petroleum ether) to provide the title compound as a colourless oil (87 mg, 77 % yield).

$^1H$  NMR (400 MHz,  $CDCl_3$ )  $\delta$  7.23 (d,  $J$  = 8.0 Hz, 2H), 7.18 (d,  $J$  = 8.0 Hz, 2H), 4.27 (q,  $J$  = 6.4 Hz, 1H), 3.68 (s, 3H), 2.95 (t,  $J$  = 7.8 Hz, 2H), 2.64 (t,  $J$  = 7.9 Hz, 2H), 1.42 (d,  $J$  = 6.5 Hz, 3H).

$^{13}C$  NMR (100 MHz,  $CDCl_3$ )  $\delta$  173.3, 141.5, 139.7, 128.3, 126.3, 79.2, 51.6, 35.6, 30.6, 23.7.

HRMS (ESI) Calcd. for  $C_{13}H_{16}D_3O_3$   $[(M+H)^+]$  226.1522, found 226.1526.

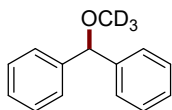

**(( $d^3$ -methoxy)methylene)dibenzene (21):**

According to the general procedure, diphenylmethane (84 mg, 0.5 mmol, 1.0 equiv.),  $d^4$ -MeOH (90 mg, 2.5 mmol, 5.0 equiv.), Selectfluor (354 mg, 1.0 mmol, 2.0 equiv.),  $Ni(acac)_2$  (12.9 mg, 0.05 mmol, 10 mol%), bpy (7.8 mg, 0.05 mmol, 10 mol%),  $[Ir\{dF(CF_3)ppy\}_2(dtbbpy)]PF_6$  (5.6 mg, 0.005 mmol, 1 mol%) and 2.5 mL  $CH_3CN$  were used. After 24 hours, the reaction mixture was subjected to the workup protocol outlined in the general procedure and purified by flash chromatography (2 % ethyl acetate/petroleum ether) to provide the title compound as a colourless oil (84 mg, 84 % yield).

$^1H$  NMR (400 MHz,  $CDCl_3$ )  $\delta$  7.25 (q,  $J$  = 7.7 Hz, 8H), 7.16 (t,  $J$  = 6.7 Hz, 2H), 5.16 (s, 1H).

$^{13}C$  NMR (150 MHz,  $CDCl_3$ )  $\delta$  142.1, 128.4, 127.5, 126.9, 85.4, 56.2 (quin,  $J$  = 21.3 Hz).

HRMS (ESI) Calcd. for  $C_{14}H_{12}D_3O$   $[(M+H)^+]$  202.1311, found 202.1317.

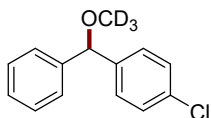

**1-chloro-4-(( $d^3$ -methoxy)(phenyl)methyl)benzene (22):**

According to the general procedure, 1-benzyl-4-chlorobenzene (101 mg, 0.5 mmol, 1.0 equiv.),  $d^4$ -MeOH (90 mg, 2.5 mmol, 5.0 equiv.), Selectfluor (354 mg, 1.0 mmol, 2.0 equiv.),  $Ni(acac)_2$  (12.9 mg, 0.05 mmol, 10 mol%), bpy (7.8 mg, 0.05 mmol, 10 mol%),  $[Ir\{dF(CF_3)ppy\}_2(dtbbpy)]PF_6$  (5.6 mg, 0.005 mmol, 1 mol%) and 2.5 mL  $CH_3CN$  were used. After 24 hours, the reaction mixture was subjected to the workup protocol outlined in the general procedure and purified by flash chromatography (2 % ethyl acetate/petroleum ether) to provide the title compound as a colourless oil (93 mg, 79 % yield).

$^1\text{H}$  NMR (400 MHz,  $\text{CDCl}_3$ )  $\delta$  7.34 - 7.29 (m, 4H), 7.29 - 7.22 (m, 5H), 5.20 (s, 1H).

$^{13}\text{C}$  NMR (100 MHz,  $\text{CDCl}_3$ )  $\delta$  141.6, 140.7, 133.1, 128.5, 128.2, 127.7, 126.8, 84.6, 56.1 (quin,  $J = 21.9$  Hz).

HRMS (ESI) Calcd. for  $\text{C}_{14}\text{H}_{11}\text{D}_3\text{ClO}$   $[(\text{M}+\text{H})^+]$  236.0921, found 236.0928.

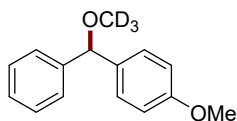

#### 1-methoxy-4-(( $d^3$ -methoxy)(phenyl)methyl)benzene (23):

According to the general procedure, 1-benzyl-4-methoxybenzene (99 mg, 0.5 mmol, 1.0 equiv.),  $d^4$ -MeOH (90 mg, 2.5 mmol, 5.0 equiv.), Selectfluor (354 mg, 1.0 mmol, 2.0 equiv.),  $\text{Ni}(\text{acac})_2$  (12.9 mg, 0.05 mmol, 10 mol%), bpy (7.8 mg, 0.05 mmol, 10 mol%),  $[\text{Ir}\{\text{dF}(\text{CF}_3)\text{ppy}\}_2(\text{dtbbpy})]\text{PF}_6$  (5.6 mg, 0.005 mmol, 1 mol%) and 2.5 mL  $\text{CH}_3\text{CN}$  were used. After 24 hours, the reaction mixture was subjected to the workup protocol outlined in the general procedure and purified by flash chromatography (2 % ethyl acetate/petroleum ether) to provide the title compound as a colourless oil (95 mg, 82 % yield).

$^1\text{H}$  NMR (400 MHz,  $\text{CDCl}_3$ )  $\delta$  7.34 - 7.29 (m, 4H), 7.25 (dd,  $J = 5.8, 2.8$  Hz, 3H), 6.85 (d,  $J = 8.7$  Hz, 2H), 5.20 (s, 1H), 3.78 (s, 3H).

$^{13}\text{C}$  NMR (100 MHz,  $\text{CDCl}_3$ )  $\delta$  159.0, 142.3, 134.3, 128.3, 128.2, 127.3, 126.8, 113.8, 84.9, 55.2.

HRMS (ESI) Calcd. for  $\text{C}_{15}\text{H}_{14}\text{D}_3\text{O}_2$   $[(\text{M}+\text{H})^+]$  232.1412, found 232.1421.

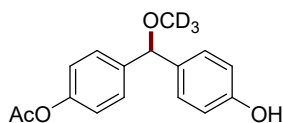

#### 4-((4-hydroxyphenyl)( $d^3$ -methoxy)methyl)phenyl acetate (24):

According to the general procedure, 4-(4-hydroxybenzyl)phenyl acetate <sup>[8]</sup> (121 mg, 0.5 mmol, 1.0 equiv.),  $d^4$ -MeOH (90 mg, 2.5 mmol, 5.0 equiv.), Selectfluor (354 mg, 1.0 mmol, 2.0 equiv.),  $\text{Ni}(\text{acac})_2$  (12.9 mg, 0.05 mmol, 10 mol%), bpy (7.8 mg, 0.05 mmol, 10 mol%),  $[\text{Ir}\{\text{dF}(\text{CF}_3)\text{ppy}\}_2(\text{dtbbpy})]\text{PF}_6$  (5.6 mg, 0.005 mmol, 1 mol%) and 2.5 mL  $\text{CH}_3\text{CN}$  were used. After 24 hours, the reaction mixture was subjected to the workup protocol outlined in the general procedure and purified by flash chromatography (20 % ethyl acetate/petroleum ether) to provide the title compound as a colourless oil (98 mg, 71 % yield).

$^1\text{H}$  NMR (400 MHz,  $\text{CDCl}_3$ )  $\delta$  7.32 (d,  $J = 8.5$  Hz, 2H), 7.15 (d,  $J = 8.5$  Hz, 2H), 7.03 (d,  $J = 8.6$  Hz, 2H), 6.72 (d,  $J = 8.6$  Hz, 2H), 5.45 (s, 1H), 5.18 (s, 1H), 2.28 (s, 3H).

$^{13}\text{C}$  NMR (101 MHz,  $\text{CDCl}_3$ )  $\delta$  169.7, 155.2, 149.8, 139.8, 133.7, 129.9, 128.5, 127.9, 121.4, 115.3, 84.3, 21.1.

HRMS (ESI) Calcd. for  $\text{C}_{16}\text{H}_{14}\text{D}_3\text{O}_4$   $[(\text{M}+\text{H})^+]$  276.1310, found 276.1315.

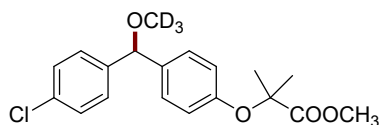

#### methyl 2-(4-((4-chlorophenyl)( $d^3$ -methoxy)methyl)phenoxy)-2-methylpropanoate (25):

According to the general procedure, methyl 2-(4-(4-chlorobenzyl)phenoxy)-2-methylpropanoate <sup>[9]</sup> (159 mg, 0.5 mmol, 1.0 equiv.),  $d^4$ -MeOH (90 mg, 2.5 mmol, 5.0 equiv.), Selectfluor (354 mg, 1.0

mmol, 2.0 equiv.), Ni(acac)<sub>2</sub> (12.9 mg, 0.05 mmol, 10 mol%), bpy (7.8 mg, 0.05 mmol, 10 mol%), [Ir{dF(CF<sub>3</sub>)ppy}<sub>2</sub>(dtbbpy)]PF<sub>6</sub> (5.6 mg, 0.005 mmol, 1 mol%) and 2.5 mL CH<sub>3</sub>CN were used. After 24 hours, the reaction mixture was subjected to the workup protocol outlined in the general procedure and purified by flash chromatography (10 % ethyl acetate/petroleum ether) to provide the title compound as a colourless oil (100 mg, 57 % yield).

<sup>1</sup>H NMR (400 MHz, CDCl<sub>3</sub>) δ 7.26 (d, *J* = 4.1 Hz, 2H), 7.19 (dd, *J* = 9.3, 4.5 Hz, 2H), 7.13 (d, *J* = 8.6 Hz, 2H), 6.70 (d, *J* = 8.5 Hz, 2H), 5.11 (s, 1H), 3.67 (s, 3H), 1.50 (s, 6H).

<sup>13</sup>C NMR (100 MHz, CDCl<sub>3</sub>) δ 174.8, 154.6, 142.0, 135.8, 128.5, 128.3, 128.2, 127.9, 127.4, 126.9, 118.8, 84.8, 79.0, 52.4, 25.3.

HRMS (ESI) Calcd. for C<sub>19</sub>H<sub>19</sub>D<sub>3</sub>ClO<sub>4</sub> [(M+H)<sup>+</sup>] 352.1390, found 352.1401.

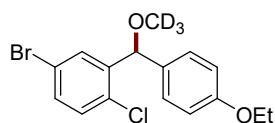

#### 4-bromo-1-chloro-2-((4-ethoxyphenyl)(*d*<sup>3</sup>-methoxy)methyl)benzene (26):

According to the general procedure, 4-bromo-1-chloro-2-(4-ethoxybenzyl)benzene (163 mg, 0.5 mmol, 1.0 equiv.), *d*<sup>4</sup>-MeOH (90 mg, 2.5 mmol, 5.0 equiv.), Selectfluor (354 mg, 1.0 mmol, 2.0 equiv.), Ni(acac)<sub>2</sub> (12.9 mg, 0.05 mmol, 10 mol%), bpy (7.8 mg, 0.05 mmol, 10 mol%), [Ir{dF(CF<sub>3</sub>)ppy}<sub>2</sub>(dtbbpy)]PF<sub>6</sub> (5.6 mg, 0.005 mmol, 1 mol%) and 2.5 mL CH<sub>3</sub>CN were used. After 24 hours, the reaction mixture was subjected to the workup protocol outlined in the general procedure and purified by flash chromatography (2 % ethyl acetate/petroleum ether) to provide the title compound as a colourless oil (170 mg, 95 % yield).

<sup>1</sup>H NMR (400 MHz, CDCl<sub>3</sub>) δ 7.68 (d, *J* = 2.4 Hz, 1H), 7.24 (dd, *J* = 8.5, 2.4 Hz, 1H), 7.21 - 7.15 (m, 2H), 7.10 (d, *J* = 8.5 Hz, 1H), 6.77 (d, *J* = 8.7 Hz, 2H), 5.44 (s, 1H), 3.93 (q, *J* = 7.0 Hz, 2H), 1.32 (t, *J* = 7.0 Hz, 3H).

<sup>13</sup>C NMR (150 MHz, CDCl<sub>3</sub>) δ 158.6, 142.0, 131.7, 131.5, 131.4, 130.9, 130.6, 128.7, 121.0, 114.3, 80.7, 63.4, 56.1 (quin, *J* = 21.4 Hz), 14.8.

HRMS (ESI) Calcd. for C<sub>16</sub>H<sub>14</sub>D<sub>3</sub>BrClO<sub>2</sub> [(M+H)<sup>+</sup>] 358.0289, found 358.0297.

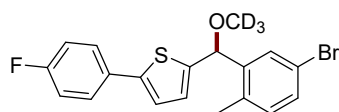

#### 2-((5-bromo-2-methylphenyl)(*d*<sup>3</sup>-methoxy)methyl)-5-(4-fluorophenyl)thiophene (27):

According to the general procedure, 2-(5-bromo-2-methylbenzyl)-5-(4-fluorophenyl) thiophene (181 mg, 0.5 mmol, 1.0 equiv.), *d*<sup>4</sup>-MeOH (90 mg, 2.5 mmol, 5.0 equiv.), Selectfluor (354 mg, 1.0 mmol, 2.0 equiv.), Ni(acac)<sub>2</sub> (12.9 mg, 0.05 mmol, 10 mol%), bpy (7.8 mg, 0.05 mmol, 10 mol%), [Ir{dF(CF<sub>3</sub>)ppy}<sub>2</sub>(dtbbpy)]PF<sub>6</sub> (5.6 mg, 0.005 mmol, 1 mol%) and 2.5 mL CH<sub>3</sub>CN were used. After 24 hours, the reaction mixture was subjected to the workup protocol outlined in the general procedure and purified by flash chromatography (2 % ethyl acetate/petroleum ether) to provide the title compound as a white solid (181 mg, 92 % yield).

<sup>1</sup>H NMR (500 MHz, CDCl<sub>3</sub>) δ 7.74 (d, *J* = 2.0 Hz, 1H), 7.55 - 7.46 (m, 2H), 7.36 (dd, *J* = 8.1, 2.1 Hz, 1H), 7.09 - 6.99 (m, 4H), 6.76 (d, *J* = 3.6 Hz, 1H), 5.53 (s, 1H), 2.25 (s, 3H).

$^{13}\text{C}$  NMR (125 MHz,  $\text{CDCl}_3$ )  $\delta$  163.3, 161.3, 143.8, 143.7, 141.2, 134.5, 132.2, 130.8, 130.5, 129.0, 127.4, 127.3, 126.8, 122.3, 120.1, 115.8, 115.7, 77.8, 56.3 (quin,  $J = 21.4$  Hz), 18.7.

HRMS (ESI) Calcd. for  $\text{C}_{19}\text{H}_{14}\text{D}_3\text{BrFOS}$   $[(\text{M}+\text{H})^+]$  394.0356, found 394.0359.

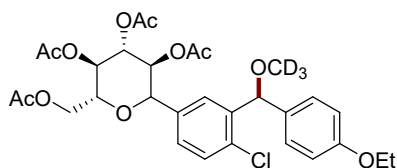

**(2*R*,3*R*,4*R*,5*S*)-2-(acetoxymethyl)-6-(4-chloro-3-((4-ethoxyphenyl)( $d^3$ -methoxy)methyl)phenyl)tetrahydro-2*H*-pyran-3,4,5-triyl triacetate (28):**

According to the general procedure, (2*R*,3*R*,4*R*,5*S*)-2-(acetoxymethyl)-6-(4-chloro-3-(4-ethoxybenzyl)phenyl)tetrahydro-2*H*-pyran-3,4,5-triyl triacetate (289 mg, 0.5 mmol, 1.0 equiv.),  $d^4$ -MeOH (90 mg, 2.5 mmol, 5.0 equiv.), Selectfluor (354 mg, 1.0 mmol, 2.0 equiv.),  $\text{Ni}(\text{acac})_2$  (12.9 mg, 0.05 mmol, 10 mol%), bpy (7.8 mg, 0.05 mmol, 10 mol%),  $[\text{Ir}\{\text{dF}(\text{CF}_3)\text{ppy}\}_2(\text{dtbbpy})]\text{PF}_6$  (5.6 mg, 0.005 mmol, 1 mol%) and 2.5 mL  $\text{CH}_3\text{CN}$  were used. After 24 hours, the reaction mixture was subjected to the workup protocol outlined in the general procedure and purified by flash chromatography (50 % ethyl acetate/petroleum ether) to provide the title compound as a white solid (268 mg, 88 % yield).

**(1.09:1 dr)**

$^1\text{H}$  NMR (400 MHz,  $\text{CDCl}_3$ , **mixture**)  $\delta$  7.74 (d,  $J = 8.9$  Hz, 2H), 7.43 (s, 2H), 7.29 (d,  $J = 9.6$  Hz, 2H), 6.93 (d,  $J = 8.9$  Hz, 2H), 6.23 (6.21) (s, 1H), 5.35 - 5.30 (m, 1H), 5.25 - 5.17 (m, 1H), 5.10 - 5.03 (m, 1H), 4.43 - 4.36 (m, 1H), 4.30 - 4.25 (m, 1H), 4.19 - 4.09 (m, 2H), 3.86 - 3.83 (m, 1H), 3.42 - 3.31 (m, 1H), 2.10 - 2.05 (m, 6H), 2.02 - 1.96 (1.87 - 1.83) (m, 6H), 1.47 - 1.41 (m, 3H).

$^{13}\text{C}$  NMR (100 MHz,  $\text{CDCl}_3$ , **mixture**)  $\delta$  193.2, 170.6, 170.2, 169.4, 168.8, 163.7, 144.6, 144.4, 139.0, 135.3, 132.5, 131.5, 131.4, 130.1, 130.0, 129.6, 129.5, 129.0, 128.8, 127.7, 127.6, 114.4, 79.2, 79.0, 76.2, 74.0, 73.9, 72.6, 72.5, 68.5, 63.9, 62.2, 20.7, 20.6, 20.4, 14.6.

HRMS (ESI) Calcd. for  $\text{C}_{30}\text{H}_{33}\text{D}_3\text{ClO}_{11}$   $[(\text{M}+\text{H})^+]$  610.2134, found 610.2139.

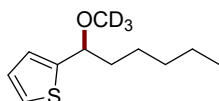

**2-(1-( $d^3$ -methoxy)hexyl)thiophene (29):**

According to the general procedure, 2-hexylthiophene (84 mg, 0.5 mmol, 1.0 equiv.),  $d^4$ -MeOH (90 mg, 2.5 mmol, 5.0 equiv.), Selectfluor (354 mg, 1.0 mmol, 2.0 equiv.),  $\text{Ni}(\text{acac})_2$  (12.9 mg, 0.05 mmol, 10 mol%), bpy (7.8 mg, 0.05 mmol, 10 mol%),  $[\text{Ir}\{\text{dF}(\text{CF}_3)\text{ppy}\}_2(\text{dtbbpy})]\text{PF}_6$  (5.6 mg, 0.005 mmol, 1 mol%) and 2.5 mL  $\text{CH}_3\text{CN}$  were used. After 24 hours, the reaction mixture was subjected to the workup protocol outlined in the general procedure and purified by flash chromatography (2 % ethyl acetate/petroleum ether) to provide the title compound as a colourless oil (71 mg, 71 % yield).

$^1\text{H}$  NMR (400 MHz,  $\text{CDCl}_3$ )  $\delta$  7.20 (d,  $J = 5.1$  Hz, 1H), 6.89 (d,  $J = 4.9$  Hz, 2H), 4.28 (t,  $J = 6.8$  Hz, 1H), 1.84 (dd,  $J = 18.4, 10.8$  Hz, 1H), 1.67 (dd,  $J = 12.3, 6.1$  Hz, 1H), 1.39 - 1.29 (m, 1H), 1.21 (s, 7H), 0.80 (t,  $J = 5.7$  Hz, 3H).

$^{13}\text{C}$  NMR (150 MHz,  $\text{CDCl}_3$ )  $\delta$  146.4, 126.3, 125.2, 124.8, 79.4, 55.7 (quin,  $J = 21.1$  Hz), 38.3, 31.6, 25.5, 22.6, 14.1.

HRMS (ESI) Calcd. for  $\text{C}_{11}\text{H}_{16}\text{D}_3\text{OS}$   $[(\text{M}+\text{H})^+]$  202.1345, found 202.1348.

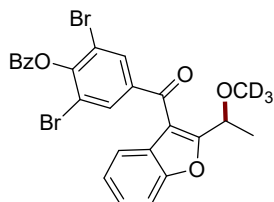

### 2,6-dibromo-4-(2-(1-( $d^3$ -methoxy)ethyl)benzofuran-3-carbonyl)phenyl benzoate (30):

According to the general procedure, 2,6-dibromo-4-(2-ethylbenzofuran-3-carbonyl) phenyl benzoate [5] (264 mg, 0.5 mmol, 1.0 equiv.),  $d^4$ -MeOH (90 mg, 2.5 mmol, 5.0 equiv.), Selectfluor (354 mg, 1.0 mmol, 2.0 equiv.),  $\text{Ni}(\text{acac})_2$  (12.9 mg, 0.05 mmol, 10 mol%), bpy (7.8 mg, 0.05 mmol, 10 mol%),  $[\text{Ir}\{\text{dF}(\text{CF}_3)\text{ppy}\}_2(\text{dtbbpy})]\text{PF}_6$  (5.6 mg, 0.005 mmol, 1 mol%) and 2.5 mL  $\text{CH}_3\text{CN}$  were used. After 24 hours, the reaction mixture was subjected to the workup protocol outlined in the general procedure and purified by flash chromatography (20 % ethyl acetate/petroleum ether) to provide the title compound as a colourless oil (106 mg, 73 % yield).

$^1\text{H}$  NMR (400 MHz,  $\text{CDCl}_3$ )  $\delta$  8.33 - 8.23 (m, 2H), 8.12 (s, 2H), 7.71 (t,  $J = 7.5$  Hz, 1H), 7.58 (dd,  $J = 15.4, 7.8$  Hz, 3H), 7.45 - 7.35 (m, 2H), 7.30 (dd,  $J = 11.1, 4.0$  Hz, 1H), 4.76 (q,  $J = 6.5$  Hz, 1H), 1.64 (d,  $J = 6.6$  Hz, 3H).

$^{13}\text{C}$  NMR (100 MHz,  $\text{CDCl}_3$ )  $\delta$  187.5, 162.9, 162.6, 154.0, 150.2, 138.5, 134.4, 133.2, 130.6, 128.8, 127.9, 125.7, 125.6, 124.2, 121.3, 118.6, 117.3, 111.9, 71.1, 19.3.

HRMS (ESI) Calcd. for  $\text{C}_{25}\text{H}_{16}\text{D}_3\text{Br}_2\text{O}_5$   $[(\text{M}+\text{H})^+]$  561.9762, found 561.9767.

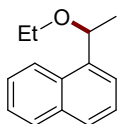

### 1-(1-ethoxyethyl)naphthalene (31):

According to the general procedure, 1-ethylnaphthalene (78 mg, 0.5 mmol, 1.0 equiv.), EtOH (115 mg, 2.5 mmol, 5.0 equiv.), Selectfluor (354 mg, 1.0 mmol, 2.0 equiv.),  $\text{Ni}(\text{acac})_2$  (12.9 mg, 0.05 mmol, 10 mol%), bpy (7.8 mg, 0.05 mmol, 10 mol%),  $[\text{Ir}\{\text{dF}(\text{CF}_3)\text{ppy}\}_2(\text{dtbbpy})]\text{PF}_6$  (5.6 mg, 0.005 mmol, 1 mol%) and 2.5 mL  $\text{CH}_3\text{CN}$  were used. After 24 hours, the reaction mixture was subjected to the workup protocol outlined in the general procedure and purified by flash chromatography (2 % ethyl acetate/petroleum ether) to provide the title compound as a colourless oil (75 mg, 75 % yield).

$^1\text{H}$  NMR (400 MHz,  $\text{CDCl}_3$ )  $\delta$  8.19 (d,  $J = 7.7$  Hz, 1H), 7.91 - 7.84 (m, 1H), 7.76 (d,  $J = 8.1$  Hz, 1H), 7.58 (d,  $J = 6.9$  Hz, 1H), 7.52 - 7.41 (m, 3H), 5.16 (q,  $J = 6.5$  Hz, 1H), 3.44 (q,  $J = 7.0$  Hz, 2H), 1.61 (d,  $J = 6.5$  Hz, 3H), 1.23 (t,  $J = 7.0$  Hz, 3H).

$^{13}\text{C}$  NMR (100 MHz,  $\text{CDCl}_3$ )  $\delta$  139.8, 134.0, 130.9, 128.9, 127.7, 125.8, 125.6, 125.4, 123.4, 123.2, 75.5, 64.1, 23.6, 15.6.

HRMS (ESI) Calcd. for  $\text{C}_{14}\text{H}_{17}\text{O}$   $[(\text{M}+\text{H})^+]$  201.1279, found 201.1283.

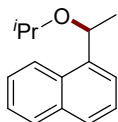

### 1-(1-isopropoxyethyl)naphthalene (32):

According to the general procedure, 1-ethylnaphthalene (78 mg, 0.5 mmol, 1.0 equiv.), isopropyl alcohol (150 mg, 2.5 mmol, 5.0 equiv.), Selectfluor (354 mg, 1.0 mmol, 2.0 equiv.), Ni(acac)<sub>2</sub> (12.9 mg, 0.05 mmol, 10 mol%), bpy (7.8 mg, 0.05 mmol, 10 mol%), [Ir{dF(CF<sub>3</sub>)ppy}<sub>2</sub>(dtbbpy)]PF<sub>6</sub> (5.6 mg, 0.005 mmol, 1 mol%) and 2.5 mL CH<sub>3</sub>CN were used. After 24 hours, the reaction mixture was subjected to the workup protocol outlined in the general procedure and purified by flash chromatography (2 % ethyl acetate/petroleum ether) to provide the title compound as a colourless oil (66 mg, 62 % yield).

<sup>1</sup>H NMR (400 MHz, CDCl<sub>3</sub>) δ 8.21 (d, *J* = 7.9 Hz, 1H), 7.91 - 7.83 (m, 1H), 7.76 (d, *J* = 8.2 Hz, 1H), 7.61 (d, *J* = 7.0 Hz, 1H), 7.53 - 7.44 (m, 3H), 5.28 (q, *J* = 6.5 Hz, 1H), 3.58 - 3.49 (m, 1H), 1.58 (d, *J* = 6.6 Hz, 3H), 1.20 (d, *J* = 6.0 Hz, 3H), 1.14 (d, *J* = 6.2 Hz, 3H).

<sup>13</sup>C NMR (100 MHz, CDCl<sub>3</sub>) δ 140.4, 133.9, 130.8, 128.9, 127.6, 125.7, 125.5, 125.3, 123.5, 123.4, 72.3, 68.8, 24.2, 23.4, 21.4.

HRMS (ESI) Calcd. for C<sub>15</sub>H<sub>19</sub>O [(M+H)<sup>+</sup>] 215.1436, found 215.1441.

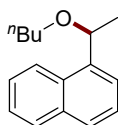

### 1-(1-butoxyethyl)naphthalene (33):

According to the general procedure, 1-ethylnaphthalene (78 mg, 0.5 mmol, 1.0 equiv.), 1-butanol (185 mg, 2.5 mmol, 5.0 equiv.), Selectfluor (354 mg, 1.0 mmol, 2.0 equiv.), Ni(acac)<sub>2</sub> (12.9 mg, 0.05 mmol, 10 mol%), bpy (7.8 mg, 0.05 mmol, 10 mol%), [Ir{dF(CF<sub>3</sub>)ppy}<sub>2</sub>(dtbbpy)]PF<sub>6</sub> (5.6 mg, 0.005 mmol, 1 mol%) and 2.5 mL CH<sub>3</sub>CN were used. After 24 hours, the reaction mixture was subjected to the workup protocol outlined in the general procedure and purified by flash chromatography (2 % ethyl acetate/petroleum ether) to provide the title compound as a colourless oil (81 mg, 71 % yield).

<sup>1</sup>H NMR (400 MHz, CDCl<sub>3</sub>) δ 8.18 (d, *J* = 7.6 Hz, 1H), 7.90 - 7.82 (m, 1H), 7.76 (d, *J* = 8.1 Hz, 1H), 7.57 (d, *J* = 7.0 Hz, 1H), 7.51 - 7.44 (m, 3H), 5.13 (q, *J* = 6.5 Hz, 1H), 3.41 - 3.34 (m, 2H), 1.60 (d, *J* = 6.6 Hz, 3H), 1.57 (dd, *J* = 8.3, 4.7 Hz, 2H), 1.38 (dd, *J* = 14.7, 7.3 Hz, 2H), 0.88 (t, *J* = 7.4 Hz, 3H).

<sup>13</sup>C NMR (100 MHz, CDCl<sub>3</sub>) δ 139.9, 133.9, 130.8, 128.8, 127.6, 125.7, 125.5, 125.4, 123.4, 123.2, 75.6, 68.7, 32.2, 23.5, 19.4, 13.9.

HRMS (ESI) Calcd. for C<sub>16</sub>H<sub>21</sub>O [(M+H)<sup>+</sup>] 229.1592, found 229.1599.

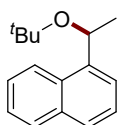

### 1-(1-(tert-butoxy)ethyl)naphthalene (34):

According to the general procedure, 1-ethylnaphthalene (78 mg, 0.5 mmol, 1.0 equiv.), *tert*-butanol (185 mg, 2.5 mmol, 5.0 equiv.), Selectfluor (354 mg, 1.0 mmol, 2.0 equiv.), Ni(acac)<sub>2</sub> (12.9 mg, 0.05 mmol, 10 mol%), bpy (7.8 mg, 0.05 mmol, 10 mol%), [Ir{dF(CF<sub>3</sub>)ppy}<sub>2</sub>(dtbbpy)]PF<sub>6</sub> (5.6 mg, 0.005 mmol, 1 mol%) and 2.5 mL CH<sub>3</sub>CN were used. After 24 hours, the reaction mixture was subjected to the workup protocol outlined in the general procedure and purified by flash chromatography (2 % ethyl acetate/petroleum ether) to provide the title compound as a colourless oil (78 mg, 68 % yield).

<sup>1</sup>H NMR (400 MHz, CDCl<sub>3</sub>) δ 8.13 (d, *J* = 8.1 Hz, 1H), 7.88 - 7.82 (m, 1H), 7.72 (t, *J* = 8.5 Hz, 2H), 7.54 - 7.42 (m, 3H), 5.38 (q, *J* = 6.5 Hz, 1H), 1.51 (d, *J* = 6.5 Hz, 3H), 1.18 (s, 9H).

<sup>13</sup>C NMR (100 MHz, CDCl<sub>3</sub>) δ 143.3, 133.7, 129.8, 128.9, 126.89, 125.6, 125.1, 123.3, 123.1, 74.3, 67.0, 28.4, 26.0.

HRMS (ESI) Calcd. for C<sub>16</sub>H<sub>21</sub>O [(M+H)<sup>+</sup>] 229.1592, found 229.1601.

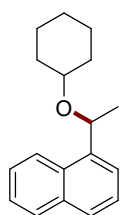

### 1-(1-(cyclohexyloxy)ethyl)naphthalene (35):

According to the general procedure, 1-ethylnaphthalene (78 mg, 0.5 mmol, 1.0 equiv.), cyclohexanol (250 mg, 2.5 mmol, 5.0 equiv.), Selectfluor (354 mg, 1.0 mmol, 2.0 equiv.), Ni(acac)<sub>2</sub> (12.9 mg, 0.05 mmol, 10 mol%), bpy (7.8 mg, 0.05 mmol, 10 mol%), [Ir{dF(CF<sub>3</sub>)ppy}<sub>2</sub>(dtbbpy)]PF<sub>6</sub> (5.6 mg, 0.005 mmol, 1 mol%) and 2.5 mL CH<sub>3</sub>CN were used. After 24 hours, the reaction mixture was subjected to the workup protocol outlined in the general procedure and purified by flash chromatography (2 % ethyl acetate/petroleum ether) to provide the title compound as a colourless oil (76 mg, 60 % yield).

<sup>1</sup>H NMR (400 MHz, CDCl<sub>3</sub>) δ 8.19 (d, *J* = 7.7 Hz, 1H), 7.90 - 7.83 (m, 1H), 7.76 (d, *J* = 8.2 Hz, 1H), 7.63 (d, *J* = 7.0 Hz, 1H), 7.48 (dt, *J* = 11.8, 4.8 Hz, 3H), 5.34 (q, *J* = 6.5 Hz, 1H), 3.26 - 3.17 (m, 1H), 2.03 (d, *J* = 10.3 Hz, 1H), 1.80 (d, *J* = 10.3 Hz, 1H), 1.74 - 1.62 (m, 2H), 1.58 (d, *J* = 6.6 Hz, 3H), 1.48 (dd, *J* = 10.9, 4.8 Hz, 1H), 1.41 - 1.31 (m, 2H), 1.17 - 1.05 (m, 3H).

<sup>13</sup>C NMR (100 MHz, CDCl<sub>3</sub>) δ 140.7, 133.9, 130.79, 128.9, 127.45, 125.7, 125.6, 125.3, 123.4, 75.1, 71.8, 33.5, 31.8, 25.8, 24.4, 24.3, 24.2.

HRMS (ESI) Calcd. for C<sub>18</sub>H<sub>23</sub>O [(M+H)<sup>+</sup>] 255.1749, found 255.1753.

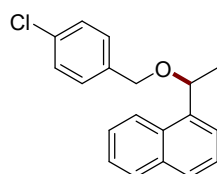

### 1-(1-((4-chlorobenzyl)oxy)ethyl)naphthalene (36):

According to the general procedure, 1-ethylnaphthalene (78 mg, 0.5 mmol, 1.0 equiv.), (4-chlorophenyl)methanol (356 mg, 2.5 mmol, 5.0 equiv.), Selectfluor (354 mg, 1.0 mmol, 2.0 equiv.), Ni(acac)<sub>2</sub> (12.9 mg, 0.05 mmol, 10 mol%), bpy (7.8 mg, 0.05 mmol, 10 mol%),



[Ir{dF(CF<sub>3</sub>)ppy}<sub>2</sub>(dtbbpy)]PF<sub>6</sub> (5.6 mg, 0.005 mmol, 1 mol%) and 2.5 mL CH<sub>3</sub>CN were used. After 24 hours, the reaction mixture was subjected to the workup protocol outlined in the general procedure and purified by flash chromatography (2 % ethyl acetate/petroleum ether) to provide the title compound as a colourless oil (121 mg, 82 % yield).

<sup>1</sup>H NMR (400 MHz, CDCl<sub>3</sub>) δ 8.22 - 8.13 (m, 1H), 7.92 - 7.85 (m, 1H), 7.79 (d, *J* = 8.1 Hz, 1H), 7.61 (d, *J* = 7.0 Hz, 1H), 7.48 (dd, *J* = 9.0, 6.1 Hz, 3H), 7.29 (d, *J* = 8.4 Hz, 2H), 7.24 (d, *J* = 7.7 Hz, 2H), 5.22 (q, *J* = 6.5 Hz, 1H), 4.47 (d, *J* = 12.0 Hz, 1H), 4.31 (d, *J* = 12.0 Hz, 1H), 1.65 (d, *J* = 6.5 Hz, 3H).

<sup>13</sup>C NMR (100 MHz, CDCl<sub>3</sub>) δ 139.0, 137.1, 134.0, 133.2, 130.80, 129.0, 128.9, 128.5, 128.0, 125.9, 125.6, 125.5, 123.6, 123.3, 75.3, 69.7, 23.5.

HRMS (ESI) Calcd. for C<sub>19</sub>H<sub>18</sub>ClO [(M+H)<sup>+</sup>] 297.1046, found 297.1051.

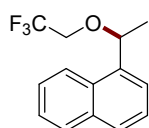

### 1-(1-(2,2,2-trifluoroethoxy)ethyl)naphthalene (37):

According to the general procedure, 1-ethylnaphthalene (78 mg, 0.5 mmol, 1.0 equiv.), 2,2,2-trifluoroethanol (250 mg, 2.5 mmol, 5.0 equiv.), Selectfluor (354 mg, 1.0 mmol, 2.0 equiv.), Ni(acac)<sub>2</sub> (12.9 mg, 0.05 mmol, 10 mol%), bpy (7.8 mg, 0.05 mmol, 10 mol%), [Ir{dF(CF<sub>3</sub>)ppy}<sub>2</sub>(dtbbpy)]PF<sub>6</sub> (5.6 mg, 0.005 mmol, 1 mol%) and 2.5 mL CH<sub>3</sub>CN were used. After 24 hours, the reaction mixture was subjected to the workup protocol outlined in the general procedure and purified by flash chromatography (petroleum ether) to provide the title compound as a colourless oil (83 mg, 65 % yield).

<sup>1</sup>H NMR (400 MHz, CDCl<sub>3</sub>) δ 8.14 (d, *J* = 7.6 Hz, 1H), 7.89 (dd, *J* = 6.9, 2.4 Hz, 1H), 7.82 (d, *J* = 8.1 Hz, 1H), 7.61 - 7.42 (m, 4H), 5.33 (q, *J* = 6.5 Hz, 1H), 3.86 - 3.60 (m, 2H), 1.69 (d, *J* = 6.5 Hz, 3H).

<sup>13</sup>C NMR (100 MHz, CDCl<sub>3</sub>) δ 137.3, 130.6, 129.0, 128.5, 126.3, 125.7, 125.5, 123.7, 123.0, 77.6, 66.1, 65.8, 29.7, 23.2.

HRMS (ESI) Calcd. for C<sub>14</sub>H<sub>14</sub>F<sub>3</sub>O [(M+H)<sup>+</sup>] 255.0997, found 255.1003.

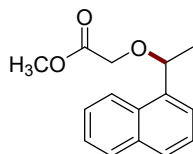

### methyl 2-(1-(naphthalen-1-yl)ethoxy)acetate (38):

According to the general procedure, 1-ethylnaphthalene (78 mg, 0.5 mmol, 1.0 equiv.), methyl 2-hydroxyacetate (225 mg, 2.5 mmol, 5.0 equiv.), Selectfluor (354 mg, 1.0 mmol, 2.0 equiv.), Ni(acac)<sub>2</sub> (12.9 mg, 0.05 mmol, 10 mol%), bpy (7.8 mg, 0.05 mmol, 10 mol%), [Ir{dF(CF<sub>3</sub>)ppy}<sub>2</sub>(dtbbpy)]PF<sub>6</sub> (5.6 mg, 0.005 mmol, 1 mol%) and 2.5 mL CH<sub>3</sub>CN were used. After 24 hours, the reaction mixture was subjected to the workup protocol outlined in the general procedure and purified by flash chromatography (10 % ethyl acetate/petroleum ether) to provide the title compound as a colourless oil (102 mg, 84 % yield).



$^1\text{H}$  NMR (400 MHz,  $\text{CDCl}_3$ )  $\delta$  8.16 (d,  $J = 7.6$  Hz, 1H), 7.88 (dd,  $J = 6.8, 2.5$  Hz, 1H), 7.79 (d,  $J = 8.1$  Hz, 1H), 7.58 (d,  $J = 6.9$  Hz, 1H), 7.54 - 7.43 (m, 3H), 5.33 (q,  $J = 6.5$  Hz, 1H), 4.10 (d,  $J = 16.4$  Hz, 1H), 3.94 (d,  $J = 16.4$  Hz, 1H), 3.72 (s, 3H), 1.70 (d,  $J = 6.5$  Hz, 3H).

$^{13}\text{C}$  NMR (100 MHz,  $\text{CDCl}_3$ )  $\delta$  171.0, 137.9, 133.9, 130.8, 128.9, 128.2, 126.1, 125.6, 125.5, 123.6, 123.2, 76.3, 65.8, 51.8, 23.3.

HRMS (ESI) Calcd. for  $\text{C}_{15}\text{H}_{17}\text{O}_3$   $[(\text{M}+\text{H})^+]$  245.1178, found 245.1184.

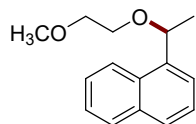

### 1-(1-(2-methoxyethoxy)ethyl)naphthalene (39):

According to the general procedure, 1-ethylnaphthalene (78 mg, 0.5 mmol, 1.0 equiv.), 2-methoxyethan-1-ol (190 mg, 2.5 mmol, 5.0 equiv.), Selectfluor (354 mg, 1.0 mmol, 2.0 equiv.),  $\text{Ni}(\text{acac})_2$  (12.9 mg, 0.05 mmol, 10 mol%), bpy (7.8 mg, 0.05 mmol, 10 mol%),  $[\text{Ir}\{\text{dF}(\text{CF}_3)\text{ppy}\}_2(\text{dtbbpy})]\text{PF}_6$  (5.6 mg, 0.005 mmol, 1 mol%) and 2.5 mL  $\text{CH}_3\text{CN}$  were used. After 24 hours, the reaction mixture was subjected to the workup protocol outlined in the general procedure and purified by flash chromatography (10 % ethyl acetate/petroleum ether) to provide the title compound as a colourless oil (104 mg, 90 % yield).

$^1\text{H}$  NMR (400 MHz,  $\text{CDCl}_3$ )  $\delta$  8.01 (d,  $J = 8.0$  Hz, 1H), 7.72 - 7.64 (m, 1H), 7.58 (d,  $J = 8.2$  Hz, 1H), 7.41 (d,  $J = 7.0$  Hz, 1H), 7.36 - 7.25 (m, 3H), 5.02 (q,  $J = 6.5$  Hz, 1H), 3.43 - 3.29 (m, 4H), 3.20 (s, 3H), 1.46 (d,  $J = 6.5$  Hz, 3H).

$^{13}\text{C}$  NMR (100 MHz,  $\text{CDCl}_3$ )  $\delta$  139.2, 133.9, 130.8, 128.8, 127.7, 125.8, 125.5, 125.4, 123.4, 123.3, 76.1, 72.1, 67.9, 59.0, 23.5.

HRMS (ESI) Calcd. for  $\text{C}_{15}\text{H}_{19}\text{O}_2$   $[(\text{M}+\text{H})^+]$  231.1385, found 231.1391.

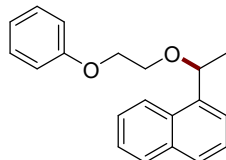

### 1-(1-(2-phenoxyethoxy)ethyl)naphthalene (40):

According to the general procedure, 1-ethylnaphthalene (78 mg, 0.5 mmol, 1.0 equiv.), 2-phenoxyethan-1-ol (345 mg, 2.5 mmol, 5.0 equiv.), Selectfluor (354 mg, 1.0 mmol, 2.0 equiv.),  $\text{Ni}(\text{acac})_2$  (12.9 mg, 0.05 mmol, 10 mol%), bpy (7.8 mg, 0.05 mmol, 10 mol%),  $[\text{Ir}\{\text{dF}(\text{CF}_3)\text{ppy}\}_2(\text{dtbbpy})]\text{PF}_6$  (5.6 mg, 0.005 mmol, 1 mol%) and 2.5 mL  $\text{CH}_3\text{CN}$  were used. After 24 hours, the reaction mixture was subjected to the workup protocol outlined in the general procedure and purified by flash chromatography (2 % ethyl acetate/petroleum ether) to provide the title compound as a colourless oil (126 mg, 86 % yield).

$^1\text{H}$  NMR (400 MHz,  $\text{CDCl}_3$ )  $\delta$  8.25 - 8.17 (m, 1H), 7.86 (dd,  $J = 6.9, 2.5$  Hz, 1H), 7.77 (d,  $J = 8.2$  Hz, 1H), 7.62 (d,  $J = 6.9$  Hz, 1H), 7.56 - 7.41 (m, 3H), 7.31 - 7.23 (m, 2H), 6.97 - 6.84 (m, 3H), 5.27 (q,  $J = 6.5$  Hz, 1H), 4.17 - 4.06 (m, 2H), 3.79 - 3.67 (m, 2H), 1.65 (d,  $J = 6.5$  Hz, 3H).

$^{13}\text{C}$  NMR (100 MHz,  $\text{CDCl}_3$ )  $\delta$  158.8, 139.0, 133.9, 130.8, 129.4, 128.9, 127.9, 125.9, 125.5, 123.6, 123.4, 120.7, 114.6, 76.3, 67.4, 67.1, 23.4.

HRMS (ESI) Calcd. for  $\text{C}_{20}\text{H}_{21}\text{O}_2$   $[(\text{M}+\text{H})^+]$  293.1542, found 293.1553.

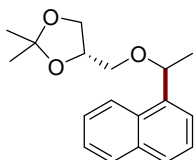

**(4S)-2,2-dimethyl-4-((1-(naphthalen-1-yl)ethoxy)methyl)-1,3-dioxolane (41):**

According to the general procedure, 1-ethylnaphthalene (78 mg, 0.5 mmol, 1.0 equiv.), (*S*)-(2,2-dimethyl-1,3-dioxolan-4-yl)methanol (330 mg, 2.5 mmol, 5.0 equiv.), Selectfluor (354 mg, 1.0 mmol, 2.0 equiv.), Ni(acac)<sub>2</sub> (12.9 mg, 0.05 mmol, 10 mol%), bpy (7.8 mg, 0.05 mmol, 10 mol%), [Ir{dF(CF<sub>3</sub>)ppy}<sub>2</sub>(dtbbpy)]PF<sub>6</sub> (5.6 mg, 0.005 mmol, 1 mol%) and 2.5 mL CH<sub>3</sub>CN were used. After 24 hours, the reaction mixture was subjected to the workup protocol outlined in the general procedure and purified by flash chromatography (2 % ethyl acetate/petroleum ether) to provide the title compound as a colourless oil (123 mg, 86 % yield).

**(1:1 dr)**

<sup>1</sup>H NMR (400 MHz, CDCl<sub>3</sub>, **mixture**) δ 8.21 - 8.13 (m, 1H), 7.90 - 7.83 (m, 1H), 7.77 (d, *J* = 8.1 Hz, 1H), 7.58 - 7.51 (m, 1H), 7.53 - 7.42 (m, 3H), 5.22 - 5.16 (m, 1H), 4.38 - 4.23 (m, 1H), 4.10 - 3.98 (m, 1H), 3.82 - 3.76 (3.65 - 3.58) (m, 1H), 3.52 - 3.45 (m, 1H), 3.40 - 3.33 (m, 1H), 1.67 - 1.58 (m, 3H), 1.42 - 1.31 (m, 6H).

<sup>13</sup>C NMR (100 MHz, CDCl<sub>3</sub>, **mixture**) δ 139.0, 138.9, 133.9, 130.7, 128.9, 128.0, 127.9, 125.9, 125.5, 123.6, 123.5, 123.4, 123.3, 109.4, 109.3, 76.5, 75.0, 74.8, 70.1, 69.7, 67.0, 66.8, 26.7, 25.4, 23.3.

HRMS (ESI) Calcd. for C<sub>18</sub>H<sub>23</sub>O<sub>3</sub> [(M+H)<sup>+</sup>] 287.1647, found 287.1653.

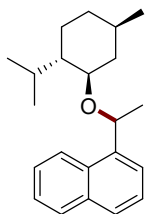

**1-(1-(((1R,2S,5R)-2-isopropyl-5-methylcyclohexyl)oxy)ethyl)naphthalene (42):**

According to the general procedure, 1-ethylnaphthalene (78 mg, 0.5 mmol, 1.0 equiv.), DL-menthol (391 mg, 2.5 mmol, 5.0 equiv.), Selectfluor (354 mg, 1.0 mmol, 2.0 equiv.), Ni(acac)<sub>2</sub> (12.9 mg, 0.05 mmol, 10 mol%), bpy (7.8 mg, 0.05 mmol, 10 mol%), [Ir{dF(CF<sub>3</sub>)ppy}<sub>2</sub>(dtbbpy)]PF<sub>6</sub> (5.6 mg, 0.005 mmol, 1 mol%) and 2.5 mL CH<sub>3</sub>CN were used. After 24 hours, the reaction mixture was subjected to the workup protocol outlined in the general procedure and purified by flash chromatography (2 % ethyl acetate/petroleum ether) to provide the title compound as a colourless oil (87 mg, 56 % yield).

**(1.1:1 dr)**

<sup>1</sup>H NMR (400 MHz, CDCl<sub>3</sub>, **mixture 1**) δ 8.07 (d, *J* = 8.1 Hz, 1H), 7.83 - 7.75 (m, 1H), 7.67 (d, *J* = 8.2 Hz, 1H), 7.60 (d, *J* = 7.0 Hz, 1H), 7.46 - 7.36 (m, 3H), 5.17 (q, *J* = 6.4 Hz, 1H), 3.26 - 3.15 (m, 1H), 2.43 - 2.32 (m, 1H), 1.78 - 1.66 (m, 1H), 1.60 - 1.52 (m, 2H), 1.49 (d, *J* = 6.5 Hz, 4H), 1.31 - 1.18 (m, 2H), 0.91 (d, *J* = 7.1 Hz, 4H), 0.83 (d, *J* = 7.0 Hz, 3H), 0.79 - 0.70 (m, 2H), 0.67 (d, *J* = 6.5 Hz, 3H).

$^{13}\text{C}$  NMR (100 MHz,  $\text{CDCl}_3$ , **mixture 1**)  $\delta$  141.6, 133.8, 130.3, 128.8, 127.4, 125.6, 125.5, 125.2, 123.7, 123.5, 78.9, 74.2, 49.1, 42.0, 34.5, 31.6, 25.5, 23.6, 23.1, 22.2, 21.3, 16.2.

HRMS (ESI) Calcd. for  $\text{C}_{22}\text{H}_{31}\text{O}$   $[(\text{M}+\text{H})^+]$  311.2375, found 311.2381.

$^1\text{H}$  NMR (400 MHz,  $\text{CDCl}_3$ , **mixture 2**)  $\delta$  8.05 (d,  $J$  = 8.0 Hz, 1H), 7.73 - 7.65 (m, 1H), 7.57 (d,  $J$  = 8.1 Hz, 1H), 7.44 (d,  $J$  = 6.7 Hz, 1H), 7.38 - 7.21 (m, 3H), 5.21 (q,  $J$  = 6.6 Hz, 1H), 2.88 - 2.76 (m, 1H), 2.25 - 2.17 (m, 1H), 2.11 (d,  $J$  = 11.0 Hz, 1H), 1.42 (d,  $J$  = 6.6 Hz, 4H), 1.41 - 1.32 (m, 2H), 1.13 - 1.01 (m, 3H), 0.74 (d,  $J$  = 6.5 Hz, 3H), 0.68 (d,  $J$  = 7.0 Hz, 3H).

$^{13}\text{C}$  NMR (100 MHz,  $\text{CDCl}_3$ , **mixture 2**)  $\delta$  140.2, 133.8, 130.9, 128.8, 127.6, 125.6, 125.4, 125.3, 124.4, 123.5, 75.9, 70.8, 48.7, 40.6, 34.5, 31.4, 24.9, 24.6, 22.7, 22.5, 21.3, 15.4.

HRMS (ESI) Calcd. for  $\text{C}_{22}\text{H}_{31}\text{O}$   $[(\text{M}+\text{H})^+]$  311.2375, found 311.2383.

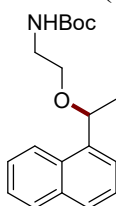

***tert*-butyl (2-(1-(naphthalen-1-yl)ethoxy)ethyl)carbamate (43):**

According to the general procedure, 1-ethylnaphthalene (78 mg, 0.5 mmol, 1.0 equiv.), *tert*-butyl (2-hydroxyethyl)carbamate (403 mg, 2.5 mmol, 5.0 equiv.), Selectfluor (354 mg, 1.0 mmol, 2.0 equiv.),  $\text{Ni}(\text{acac})_2$  (12.9 mg, 0.05 mmol, 10 mol%), bpy (7.8 mg, 0.05 mmol, 10 mol%),  $[\text{Ir}\{\text{dF}(\text{CF}_3)\text{ppy}\}_2(\text{dtbbpy})]\text{PF}_6$  (5.6 mg, 0.005 mmol, 1 mol%) and 2.5 mL  $\text{CH}_3\text{CN}$  were used. After 24 hours, the reaction mixture was subjected to the workup protocol outlined in the general procedure and purified by flash chromatography (20 % ethyl acetate/petroleum ether) to provide the title compound as a colourless oil (121 mg, 77 % yield).

$^1\text{H}$  NMR (400 MHz,  $\text{CDCl}_3$ )  $\delta$  8.17 (d,  $J$  = 7.9 Hz, 1H), 7.91 - 7.84 (m, 1H), 7.77 (d,  $J$  = 8.1 Hz, 1H), 7.56 - 7.42 (m, 4H), 5.14 (q,  $J$  = 6.5 Hz, 1H), 4.93 (s, 1H), 3.43 (dd,  $J$  = 11.4, 6.6 Hz, 2H), 3.33 - 3.23 (m, 2H), 1.62 (d,  $J$  = 6.5 Hz, 3H), 1.43 (s, 9H).

$^{13}\text{C}$  NMR (100 MHz,  $\text{CDCl}_3$ )  $\delta$  155.9, 138.9, 133.9, 130.7, 128.9, 128.0, 125.9, 125.5, 125.4, 123.5, 123.3, 76.1, 67.7, 28.4, 27.5.

HRMS (ESI) Calcd. for  $\text{C}_{19}\text{H}_{26}\text{NO}_3$   $[(\text{M}+\text{H})^+]$  316.1913, found 316.1917.

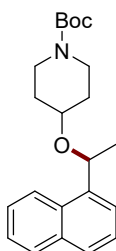

***tert*-butyl 4-(1-(naphthalen-1-yl)ethoxy)piperidine-1-carboxylate (44):**

According to the general procedure, 1-ethylnaphthalene (78 mg, 0.5 mmol, 1.0 equiv.), *tert*-butyl 4-hydroxypiperidine-1-carboxylate (503 mg, 2.5 mmol, 5.0 equiv.), Selectfluor (354 mg, 1.0 mmol, 2.0 equiv.),  $\text{Ni}(\text{acac})_2$  (12.9 mg, 0.05 mmol, 10 mol%), bpy (7.8 mg, 0.05 mmol, 10 mol%),  $[\text{Ir}\{\text{dF}(\text{CF}_3)\text{ppy}\}_2(\text{dtbbpy})]\text{PF}_6$  (5.6 mg, 0.005 mmol, 1 mol%) and 2.5 mL  $\text{CH}_3\text{CN}$  were used. After 24 hours, the reaction mixture was subjected to the workup protocol outlined in the general

procedure and purified by flash chromatography (20 % ethyl acetate/petroleum ether) to provide the title compound as a colourless oil (135 mg, 76 % yield).

$^1\text{H}$  NMR (400 MHz,  $\text{CDCl}_3$ )  $\delta$  8.19 (d,  $J = 7.7$  Hz, 1H), 7.90 - 7.83 (m, 1H), 7.76 (d,  $J = 8.1$  Hz, 1H), 7.59 (d,  $J = 6.9$  Hz, 1H), 7.54 - 7.41 (m, 3H), 5.31 (q,  $J = 6.5$  Hz, 1H), 3.77 (d,  $J = 21.4$  Hz, 2H), 3.49 - 3.37 (m, 1H), 3.04 - 2.86 (m, 2H), 1.87 (s, 1H), 1.67 (s, 1H), 1.59 (d,  $J = 6.5$  Hz, 4H), 1.54 (dd,  $J = 8.6, 4.2$  Hz, 1H), 1.44 (s, 9H).

$^{13}\text{C}$  NMR (100 MHz,  $\text{CDCl}_3$ )  $\delta$  154.8, 140.0, 133.9, 130.6, 128.9, 127.7, 125.8, 125.5, 125.4, 123.5, 123.3, 79.3, 72.5, 72.1, 28.4, 24.1.

HRMS (ESI) Calcd. for  $\text{C}_{22}\text{H}_{30}\text{NO}_3$   $[(\text{M}+\text{H})^+]$  356.2221, found 356.2229.

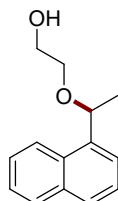

### 2-(1-(naphthalen-1-yl)ethoxy)ethan-1-ol (45):

According to the general procedure, 1-ethylnaphthalene (78 mg, 0.5 mmol, 1.0 equiv.), ethylene glycol (155 mg, 2.5 mmol, 5.0 equiv.), Selectfluor (354 mg, 1.0 mmol, 2.0 equiv.),  $\text{Ni}(\text{acac})_2$  (12.9 mg, 0.05 mmol, 10 mol%), bpy (7.8 mg, 0.05 mmol, 10 mol%),  $[\text{Ir}\{\text{dF}(\text{CF}_3)\text{ppy}\}_2(\text{dtbbpy})]\text{PF}_6$  (5.6 mg, 0.005 mmol, 1 mol%) and 2.5 mL  $\text{CH}_3\text{CN}$  were used. After 24 hours, the reaction mixture was subjected to the workup protocol outlined in the general procedure and purified by flash chromatography (50 % ethyl acetate/petroleum ether) to provide the title compound as a colourless oil (95 mg, 88 % yield).

$^1\text{H}$  NMR (400 MHz,  $\text{CDCl}_3$ )  $\delta$  8.17 (d,  $J = 7.9$  Hz, 1H), 7.92 - 7.83 (m, 1H), 7.78 (d,  $J = 8.1$  Hz, 1H), 7.56 (d,  $J = 6.9$  Hz, 1H), 7.53 - 7.41 (m, 3H), 5.20 (q,  $J = 6.5$  Hz, 1H), 3.78 - 3.68 (m, 2H), 3.55 - 3.46 (m, 2H), 2.13 (br, 1H), 1.65 (d,  $J = 6.5$  Hz, 3H).

$^{13}\text{C}$  NMR (100 MHz,  $\text{CDCl}_3$ )  $\delta$  138.9, 133.9, 130.7, 128.9, 128.0, 125.9, 125.5, 123.4, 123.2, 76.2, 69.8, 62.1, 23.2.

HRMS (ESI) Calcd. for  $\text{C}_{14}\text{H}_{17}\text{O}_2$   $[(\text{M}+\text{H})^+]$  217.1229, found 217.1240.

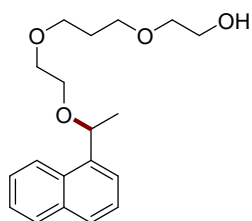

### 2-(3-(2-(1-(naphthalen-1-yl)ethoxy)ethoxy)propoxy)ethan-1-ol (46):

According to the general procedure, 1-ethylnaphthalene (78 mg, 0.5 mmol, 1.0 equiv.), triethylene glycol (411 mg, 2.5 mmol, 5.0 equiv.), Selectfluor (354 mg, 1.0 mmol, 2.0 equiv.),  $\text{Ni}(\text{acac})_2$  (12.9 mg, 0.05 mmol, 10 mol%), bpy (7.8 mg, 0.05 mmol, 10 mol%),  $[\text{Ir}\{\text{dF}(\text{CF}_3)\text{ppy}\}_2(\text{dtbbpy})]\text{PF}_6$  (5.6 mg, 0.005 mmol, 1 mol%) and 2.5 mL  $\text{CH}_3\text{CN}$  were used. After 24 hours, the reaction mixture was subjected to the workup protocol outlined in the general procedure and purified by flash chromatography (10 % dichloromethane/methanol) to provide the title compound as a colourless oil (137 mg, 86 % yield).

$^1\text{H}$  NMR (400 MHz,  $\text{CDCl}_3$ )  $\delta$  8.18 (d,  $J = 7.6$  Hz, 1H), 7.90 - 7.83 (m, 1H), 7.76 (d,  $J = 8.1$  Hz, 1H), 7.58 (d,  $J = 7.0$  Hz, 1H), 7.52 - 7.41 (m, 3H), 5.20 (q,  $J = 6.5$  Hz, 1H), 3.78 - 3.51 (m, 13H), 2.68 (s, 1H), 1.63 (d,  $J = 6.5$  Hz, 3H).

$^{13}\text{C}$  NMR (100 MHz,  $\text{CDCl}_3$ )  $\delta$  139.1, 133.9, 130.7, 128.8, 127.8, 125.8, 125.5, 125.4, 123.4, 123.3, 76.1, 72.5, 70.7, 70.6, 70.3, 67.9, 61.7, 23.4.

HRMS (ESI) Calcd. for  $\text{C}_{19}\text{H}_{27}\text{O}_4$   $[(\text{M}+\text{H})^+]$  319.1909, found 319.1917.

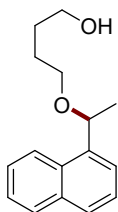

#### 4-(1-(naphthalen-1-yl)ethoxy)butan-1-ol (47):

According to the general procedure, 1-ethylnaphthalene (78 mg, 0.5 mmol, 1.0 equiv.), butane-1,4-diol (225 mg, 2.5 mmol, 5.0 equiv.), Selectfluor (354 mg, 1.0 mmol, 2.0 equiv.),  $\text{Ni}(\text{acac})_2$  (12.9 mg, 0.05 mmol, 10 mol%), bpy (7.8 mg, 0.05 mmol, 10 mol%),  $[\text{Ir}\{\text{dF}(\text{CF}_3)\text{ppy}\}_2(\text{dtbbpy})]\text{PF}_6$  (5.6 mg, 0.005 mmol, 1 mol%) and 2.5 mL  $\text{CH}_3\text{CN}$  were used. After 24 hours, the reaction mixture was subjected to the workup protocol outlined in the general procedure and purified by flash chromatography (50 % ethyl acetate/petroleum ether) to provide the title compound as a colourless oil (92 mg, 75 % yield).

$^1\text{H}$  NMR (400 MHz,  $\text{CDCl}_3$ )  $\delta$  8.08 (d,  $J = 7.8$  Hz, 1H), 7.82 - 7.76 (m, 1H), 7.69 (d,  $J = 8.1$  Hz, 1H), 7.48 (d,  $J = 6.7$  Hz, 1H), 7.45 - 7.35 (m, 3H), 5.09 (q,  $J = 6.5$  Hz, 1H), 3.56 (t,  $J = 5.7$  Hz, 2H), 3.40 - 3.27 (m, 2H), 2.17 (s, 1H), 1.67 - 1.56 (m, 4H), 1.54 (d,  $J = 6.6$  Hz, 3H).

$^{13}\text{C}$  NMR (100 MHz,  $\text{CDCl}_3$ )  $\delta$  139.2, 133.9, 130.7, 128.9, 127.8, 125.8, 125.5, 125.4, 123.3, 123.2, 75.9, 68.7, 62.7, 30.2, 26.9, 23.3.

HRMS (ESI) Calcd. for  $\text{C}_{16}\text{H}_{21}\text{O}_2$   $[(\text{M}+\text{H})^+]$  245.1542, found 245.1549.

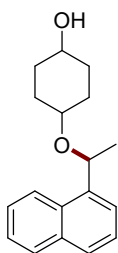

#### 4-(1-(naphthalen-1-yl)ethoxy)cyclohexan-1-ol (48):

According to the general procedure, 1-ethylnaphthalene (78 mg, 0.5 mmol, 1.0 equiv.), cyclohexane-1,4-diol (290 mg, 2.5 mmol, 5.0 equiv.), Selectfluor (354 mg, 1.0 mmol, 2.0 equiv.),  $\text{Ni}(\text{acac})_2$  (12.9 mg, 0.05 mmol, 10 mol%), bpy (7.8 mg, 0.05 mmol, 10 mol%),  $[\text{Ir}\{\text{dF}(\text{CF}_3)\text{ppy}\}_2(\text{dtbbpy})]\text{PF}_6$  (5.6 mg, 0.005 mmol, 1 mol%) and 2.5 mL  $\text{CH}_3\text{CN}$  were used. After 24 hours, the reaction mixture was subjected to the workup protocol outlined in the general procedure and purified by flash chromatography (50 % ethyl acetate/petroleum ether) to provide the title compound as a colourless oil (97 mg, 72 % yield).

(1.2:1 dr)

$^1\text{H}$  NMR (400 MHz,  $\text{CDCl}_3$ , **mixture 1**)  $\delta$  8.14 (d,  $J$  = 7.7 Hz, 1H), 7.84 - 7.76 (m, 1H), 7.69 (d,  $J$  = 8.1 Hz, 1H), 7.55 (d,  $J$  = 6.9 Hz, 1H), 7.46 - 7.35 (m, 3H), 5.21 (q,  $J$  = 6.5 Hz, 1H), 3.67 - 3.61 (m, 1H), 3.34 - 3.25 (m, 1H), 2.01 - 1.81 (m, 2H), 1.77 - 1.61 (m, 4H), 1.52 (d,  $J$  = 6.5 Hz, 4H), 1.44 - 1.33 (m, 2H).

$^{13}\text{C}$  NMR (100 MHz,  $\text{CDCl}_3$ , **mixture 1**)  $\delta$  140.4, 133.9, 130.7, 128.9, 127.6, 125.7, 125.5, 125.4, 123.5, 77.2, 72.1, 30.7, 30.5, 28.8, 26.7, 24.2.

HRMS (ESI) Calcd. for  $\text{C}_{18}\text{H}_{23}\text{O}_2$   $[(\text{M}+\text{H})^+]$  271.1698, found 271.1703.

$^1\text{H}$  NMR (400 MHz,  $\text{CDCl}_3$ , **mixture 2**)  $\delta$  8.15 - 8.09 (m, 1H), 7.81 (dd,  $J$  = 6.7, 2.8 Hz, 1H), 7.70 (d,  $J$  = 8.2 Hz, 1H), 7.53 (d,  $J$  = 6.7 Hz, 1H), 7.46 - 7.37 (m, 3H), 5.23 (q,  $J$  = 6.6 Hz, 1H), 3.64 - 3.53 (m, 1H), 3.25 - 3.15 (m, 1H), 2.10 - 2.03 (m, 1H), 1.96 - 1.77 (m, 4H), 1.50 (d,  $J$  = 6.5 Hz, 4H), 1.42 - 1.30 (m, 3H).

$^{13}\text{C}$  NMR (100 MHz,  $\text{CDCl}_3$ , **mixture 2**)  $\delta$  140.3, 130.7, 128.9, 127.6, 125.8, 125.4, 123.4, 77.2, 74.3, 72.6, 69.8, 33.0, 32.7, 29.3, 29.0, 24.2.

HRMS (ESI) Calcd. for  $\text{C}_{18}\text{H}_{23}\text{O}_2$   $[(\text{M}+\text{H})^+]$  271.1698, found 271.1707.

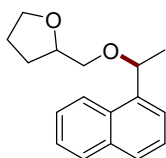

### 2-((1-(naphthalen-1-yl)ethoxy)methyl)tetrahydrofuran (49):

According to the general procedure, 1-ethylnaphthalene (78 mg, 0.5 mmol, 1.0 equiv.), (tetrahydrofuran-2-yl)methanol (255 mg, 2.5 mmol, 5.0 equiv.), Selectfluor (354 mg, 1.0 mmol, 2.0 equiv.),  $\text{Ni}(\text{acac})_2$  (12.9 mg, 0.05 mmol, 10 mol%), bpy (7.8 mg, 0.05 mmol, 10 mol%),  $[\text{Ir}\{\text{dF}(\text{CF}_3)\text{ppy}\}_2(\text{dtbbpy})]\text{PF}_6$  (5.6 mg, 0.005 mmol, 1 mol%) and 2.5 mL  $\text{CH}_3\text{CN}$  were used. After 24 hours, the reaction mixture was subjected to the workup protocol outlined in the general procedure and purified by flash chromatography (10 % ethyl acetate/petroleum ether) to provide the title compound as a colourless oil (109 mg, 85 % yield).

#### (1:1 dr)

$^1\text{H}$  NMR (400 MHz,  $\text{CDCl}_3$ , **mixture**)  $\delta$  8.27 - 8.13 (m, 1H), 7.91 - 7.83 (m, 1H), 7.76 (d,  $J$  = 8.1 Hz, 1H), 7.59 (dd,  $J$  = 12.8, 7.0 Hz, 1H), 7.55 - 7.41 (m, 3H), 5.26 - 5.15 (m, 1H), 4.14 - 4.04 (m, 1H), 3.92 - 3.82 (m, 1H), 3.77 (dd,  $J$  = 14.8, 6.9 Hz, 1H), 3.46 - 3.32 (m, 2H), 1.96 - 1.77 (m, 3H), 1.63 (t,  $J$  = 6.4 Hz, 3H).

$^{13}\text{C}$  NMR (100 MHz,  $\text{CDCl}_3$ , **mixture**)  $\delta$  139.4, 139.3, 133.9, 130.8, 128.8, 127.75, 127.7, 125.8, 125.5, 125.4, 123.6, 123.5, 123.3, 78.2, 77.8, 76.5, 76.0, 71.7, 71.3, 68.3, 28.3, 28.0, 25.6, 25.5, 23.5.

HRMS (ESI) Calcd. for  $\text{C}_{17}\text{H}_{21}\text{O}_2$   $[(\text{M}+\text{H})^+]$  257.1542, found 257.1549.

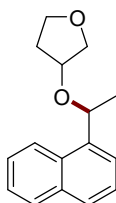

### 3-(1-(naphthalen-1-yl)ethoxy)tetrahydrofuran (50):

According to the general procedure, 1-ethylnaphthalene (78 mg, 0.5 mmol, 1.0 equiv.), tetrahydrofuran-3-ol (220 mg, 2.5 mmol, 5.0 equiv.), Selectfluor (354 mg, 1.0 mmol, 2.0 equiv.), Ni(acac)<sub>2</sub> (12.9 mg, 0.05 mmol, 10 mol%), bpy (7.8 mg, 0.05 mmol, 10 mol%), [Ir{dF(CF<sub>3</sub>)ppy}<sub>2</sub>(dtbbpy)]PF<sub>6</sub> (5.6 mg, 0.005 mmol, 1 mol%) and 2.5 mL CH<sub>3</sub>CN were used. After 24 hours, the reaction mixture was subjected to the workup protocol outlined in the general procedure and purified by flash chromatography (10 % ethyl acetate/petroleum ether) to provide the title compound as a colourless oil (89 mg, 74 % yield).

**(1:1 dr)**

<sup>1</sup>H NMR (400 MHz, CDCl<sub>3</sub>, **mixture**) δ 8.23 - 8.17 (m, 1H), 7.92 - 7.84 (m, 1H), 7.81 - 7.77 (m, 1H), 7.62 - 7.41 (m, 4H), 5.25 - 5.11 (m, 1H), 4.12 - 4.03 (m, 1H), 4.02 - 3.91 (m, 1H), 4.02 - 3.91 (3.75 - 3.62) (m, 1H), 3.85 - 3.75 (m, 1H), 3.75 - 3.62 (m, 1H), 2.18 - 1.80 (m, 2H), 1.57 - 1.49 (m, 3H).

<sup>13</sup>C NMR (100 MHz, CDCl<sub>3</sub>, **mixture**) δ 139.4, 139.3, 133.9, 130.7, 128.9, 127.9, 125.9, 125.5, 123.8, 123.7, 123.3, 77.3, 77.0, 74.3, 74.0, 73.5, 72.7, 67.1, 33.4, 32.4, 23.9.

HRMS (ESI) Calcd. for C<sub>16</sub>H<sub>19</sub>O<sub>2</sub> [(M+H)<sup>+</sup>] 243.1385, found 243.1391.

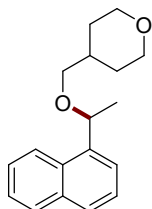

#### **4-((1-(naphthalen-1-yl)ethoxy)methyl)tetrahydro-2H-pyran (51):**

According to the general procedure, 1-ethylnaphthalene (78 mg, 0.5 mmol, 1.0 equiv.), (tetrahydro-2H-pyran-4-yl)methanol (290 mg, 2.5 mmol, 5.0 equiv.), Selectfluor (354 mg, 1.0 mmol, 2.0 equiv.), Ni(acac)<sub>2</sub> (12.9 mg, 0.05 mmol, 10 mol%), bpy (7.8 mg, 0.05 mmol, 10 mol%), [Ir{dF(CF<sub>3</sub>)ppy}<sub>2</sub>(dtbbpy)]PF<sub>6</sub> (5.6 mg, 0.005 mmol, 1 mol%) and 2.5 mL CH<sub>3</sub>CN were used. After 24 hours, the reaction mixture was subjected to the workup protocol outlined in the general procedure and purified by flash chromatography (10 % ethyl acetate/petroleum ether) to provide the title compound as a colourless oil (112 mg, 83 % yield).

<sup>1</sup>H NMR (400 MHz, CDCl<sub>3</sub>) δ 8.21 - 8.14 (m, 1H), 7.87 (dd, *J* = 6.6, 2.8 Hz, 1H), 7.77 (d, *J* = 8.1 Hz, 1H), 7.55 (d, *J* = 6.8 Hz, 1H), 7.52 - 7.42 (m, 3H), 5.11 (q, *J* = 6.5 Hz, 1H), 3.95 (dd, *J* = 11.2, 3.1 Hz, 2H), 3.39 (t, *J* = 11.2 Hz, 2H), 3.26 - 3.18 (m, 2H), 1.95 - 1.81 (m, 1H), 1.68 (dd, *J* = 21.4, 8.1 Hz, 2H), 1.59 (t, *J* = 7.0 Hz, 3H), 1.37 - 1.22 (m, 3H).

<sup>13</sup>C NMR (100 MHz, CDCl<sub>3</sub>) δ 139.6, 133.9, 130.8, 128.9, 127.7, 125.8, 125.5, 125.4, 123.4, 123.3, 76.0, 73.9, 67.7, 35.7, 30.1, 30.0, 23.4.

HRMS (ESI) Calcd. for C<sub>18</sub>H<sub>23</sub>O<sub>2</sub> [(M+H)<sup>+</sup>] 271.1698, found 271.1701.

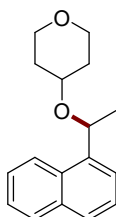



**4-(1-(naphthalen-1-yl)ethoxy)tetrahydro-2H-pyran (52):**

According to the general procedure, 1-ethylnaphthalene (78 mg, 0.5 mmol, 1.0 equiv.), tetrahydro-2H-pyran-4-ol (255 mg, 2.5 mmol, 5.0 equiv.), Selectfluor (354 mg, 1.0 mmol, 2.0 equiv.), Ni(acac)<sub>2</sub> (12.9 mg, 0.05 mmol, 10 mol%), bpy (7.8 mg, 0.05 mmol, 10 mol%), [Ir{dF(CF<sub>3</sub>)ppy}<sub>2</sub>(dtbbpy)]PF<sub>6</sub> (5.6 mg, 0.005 mmol, 1 mol%) and 2.5 mL CH<sub>3</sub>CN were used. After 24 hours, the reaction mixture was subjected to the workup protocol outlined in the general procedure and purified by flash chromatography (10 % ethyl acetate/petroleum ether) to provide the title compound as a colourless oil (90 mg, 70 % yield).

<sup>1</sup>H NMR (400 MHz, CDCl<sub>3</sub>) δ 8.22 - 8.17 (m, 1H), 7.86 (dd, *J* = 7.0, 2.4 Hz, 1H), 7.76 (d, *J* = 8.2 Hz, 1H), 7.60 (d, *J* = 6.9 Hz, 1H), 7.54 - 7.42 (m, 3H), 5.33 (q, *J* = 6.5 Hz, 1H), 3.97 - 3.91 (m, 1H), 3.90 - 3.84 (m, 1H), 3.50 - 3.41 (m, 1H), 3.36 - 3.22 (m, 2H), 2.00 - 1.91 (m, 1H), 1.79 - 1.62 (m, 3H), 1.60 (d, *J* = 6.5 Hz, 3H).

<sup>13</sup>C NMR (100 MHz, CDCl<sub>3</sub>) δ 140.0, 133.9, 130.6, 128.9, 127.7, 125.8, 125.5, 125.4, 123.5, 123.3, 72.1, 71.5, 65.9, 65.7, 33.5, 32.0, 24.1.

HRMS (ESI) Calcd. for C<sub>17</sub>H<sub>21</sub>O<sub>2</sub> [(M+H)<sup>+</sup>] 257.1542, found 257.1544.

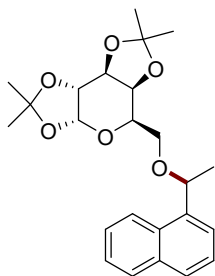**(3aR,5R,5aS,8aS,8bR)-2,2,7,7-tetramethyl-5-((1-(naphthalen-1-yl)ethoxy)methyl)tetrahydro-5H-bis([1,3]dioxolo)[4,5-b:4',5'-d]pyran (53):**

According to the general procedure, 1-ethylnaphthalene (78 mg, 0.5 mmol, 1.0 equiv.), ((3aR,5R,5aS,8aS,8bR)-2,2,7,7-tetramethyltetrahydro-5H-bis([1,3]dioxolo)[4,5-b:4',5'-d]pyran-5-yl)methanol (651 mg, 2.5 mmol, 5.0 equiv.), Selectfluor (354 mg, 1.0 mmol, 2.0 equiv.), Ni(acac)<sub>2</sub> (12.9 mg, 0.05 mmol, 10 mol%), bpy (7.8 mg, 0.05 mmol, 10 mol%), [Ir{dF(CF<sub>3</sub>)ppy}<sub>2</sub>(dtbbpy)]PF<sub>6</sub> (5.6 mg, 0.005 mmol, 1 mol%) and 2.5 mL CH<sub>3</sub>CN were used. After 24 hours, the reaction mixture was subjected to the workup protocol outlined in the general procedure and purified by flash chromatography (10 % ethyl acetate/petroleum ether) to provide the title compound as a colourless oil (170 mg, 82 % yield).

**(1.1:1 dr)**

<sup>1</sup>H NMR (400 MHz, CDCl<sub>3</sub>, **mixture**) δ 8.22 - 8.17 (m, 1H), 7.86 - 7.84 (m, 1H), 7.76 - 7.74 (m, 1H), 7.59 - 7.57 (m, 1H), 7.51 - 7.37 (m, 3H), 5.56 - 5.49 (m, 1H), 5.30 - 5.20 (m, 1H), 4.60 - 4.54 (m, 1H), 4.35 - 4.16 (m, 2H), 4.03 - 3.96 (m, 1H), 3.60 - 3.59 (d, *J* = 6.7 Hz, 2H), 1.64 - 1.62 (m, 3H), 1.58 (1.49) (s, 3H), 1.40 (1.37) (s, 3H), 1.34 - 1.27 (m, 6H).

<sup>13</sup>C NMR (100 MHz, CDCl<sub>3</sub>, **mixture**) δ 139.1, 133.9, 130.8, 128.8, 128.7, 127.8, 125.7, 125.5, 125.4, 125.3, 123.6, 123.5, 123.4, 109.1, 108.5, 108.4, 96.3, 76.3, 75.9, 71.1, 71.0, 70.7, 70.6, 67.5, 67.3, 67.0, 66.5, 26.1, 26.0, 24.9, 24.4, 24.3, 23.13.

HRMS (ESI) Calcd. for C<sub>24</sub>H<sub>31</sub>O<sub>6</sub> [(M+H)<sup>+</sup>] 415.2121, found 415.2125.



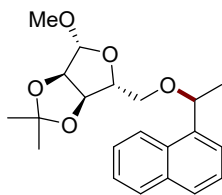

**(3aR,4R,6R,6aR)-4-methoxy-2,2-dimethyl-6-((1-(naphthalen-1-yl)ethoxy)methyl)tetrahydrofuro[3,4-*d*][1,3]dioxole (54):**

According to the general procedure, 1-ethylnaphthalene (78 mg, 0.5 mmol, 1.0 equiv.), ((3aR,4R,6R,6aR)-6-methoxy-2,2-dimethyltetrahydrofuro[3,4-*d*][1,3]dioxol-4-yl)methanol (511 mg, 2.5 mmol, 5.0 equiv.), Selectfluor (354 mg, 1.0 mmol, 2.0 equiv.), Ni(acac)<sub>2</sub> (12.9 mg, 0.05 mmol, 10 mol%), bpy (7.8 mg, 0.05 mmol, 10 mol%), [Ir{dF(CF<sub>3</sub>)ppy}<sub>2</sub>(dtbbpy)]PF<sub>6</sub> (5.6 mg, 0.005 mmol, 1 mol%) and 2.5 mL CH<sub>3</sub>CN were used. After 24 hours, the reaction mixture was subjected to the workup protocol outlined in the general procedure and purified by flash chromatography (10 % ethyl acetate/petroleum ether) to provide the title compound as a colourless oil (149 mg, 83 % yield).

**(1.08:1 dr)**

<sup>1</sup>H NMR (400 MHz, CDCl<sub>3</sub>, **mixture**) δ 8.18 - 8.16 (m, 1H), 7.90 - 7.83 (m, 1H), 7.77 (d, *J* = 8.1 Hz, 1H), 7.58 - 7.55 (m, 1H), 7.53 - 7.42 (m, 3H), 5.21 - 5.11 (m, 1H), 4.94 (4.92) (s, 1H), 4.76 (4.60) (d, *J* = 6.0 Hz, 1H), 4.57 (4.49) (d, *J* = 6.0 Hz, 1H), 4.44 - 4.32 (m, 1H), 3.50 - 3.29 (m, 2H), 3.26 (3.18) (s, 3H), 1.64 - 1.61 (m, 3H), 1.49 (s, 3H), 1.34 (1.30) (s, 3H).

<sup>13</sup>C NMR (100 MHz, CDCl<sub>3</sub>, **mixture**) δ 139.1, 134.0, 130.7, 128.9, 128.0, 127.9, 125.9, 125.6, 125.5, 123.5, 123.4, 112.4, 109.3, 85.6, 85.5, 85.3, 85.2, 82.4, 82.2, 76.5, 69.9, 69.7, 54.9, 54.8, 26.6, 26.5, 25.1, 23.5, 23.4.

HRMS (ESI) Calcd. for C<sub>21</sub>H<sub>27</sub>O<sub>5</sub> [(M+H)<sup>+</sup>] 359.1858, found 359.1866.

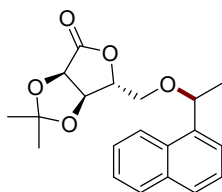

**(3aR,6R,6aR)-2,2-dimethyl-6-((1-(naphthalen-1-yl)ethoxy)methyl)dihydrofuro[3,4-*d*][1,3]dioxol-4(3aH)-one (55):**

According to the general procedure, 1-ethylnaphthalene (78 mg, 0.5 mmol, 1.0 equiv.), (3aR,6R,6aR)-6-(hydroxymethyl)-2,2-dimethyldihydrofuro[3,4-*d*][1,3]dioxol-4(3aH)-one (470 mg, 2.5 mmol, 5.0 equiv.), Selectfluor (354 mg, 1.0 mmol, 2.0 equiv.), Ni(acac)<sub>2</sub> (12.9 mg, 0.05 mmol, 10 mol%), bpy (7.8 mg, 0.05 mmol, 10 mol%), [Ir{dF(CF<sub>3</sub>)ppy}<sub>2</sub>(dtbbpy)]PF<sub>6</sub> (5.6 mg, 0.005 mmol, 1 mol%) and 2.5 mL CH<sub>3</sub>CN were used. After 24 hours, the reaction mixture was subjected to the workup protocol outlined in the general procedure and purified by flash chromatography (10 % ethyl acetate/petroleum ether) to provide the title compound as a colourless oil (144 mg, 84 % yield).

**(1.2:1 dr)**

<sup>1</sup>H NMR (400 MHz, CDCl<sub>3</sub>, **mixture 1**) δ 8.13 - 8.07 (m, 1H), 7.89 (dd, *J* = 6.6, 2.8 Hz, 1H), 7.80 (d, *J* = 7.8 Hz, 1H), 7.55 - 7.41 (m, 4H), 5.11 (q, *J* = 6.5 Hz, 1H), 4.95 (d, *J* = 5.5 Hz, 1H), 4.73 (d, *J* = 5.5 Hz, 1H), 4.59 (t, *J* = 1.8 Hz, 1H), 3.65 - 3.53 (m, 2H), 1.60 (d, *J* = 6.6 Hz, 3H), 1.48 (s, 3H), 1.39 (s, 3H).

<sup>13</sup>C NMR (100 MHz, CDCl<sub>3</sub>, **mixture 1**) δ 174.4, 137.9, 134.0, 130.4, 129.1, 128.4, 126.1, 125.8, 125.4, 123.6, 123.0, 113.1, 81.2, 78.4, 78.1, 75.8, 68.1, 26.8, 25.6, 23.0.

HRMS (ESI) Calcd. for C<sub>20</sub>H<sub>23</sub>O<sub>5</sub> [(M+H)<sup>+</sup>] 343.1545, found 343.1553.

<sup>1</sup>H NMR (400 MHz, CDCl<sub>3</sub>, **mixture 2**) δ 8.02 (d, *J* = 8.1 Hz, 1H), 7.91 - 7.84 (m, 1H), 7.78 (d, *J* = 7.9 Hz, 1H), 7.54 - 7.42 (m, 4H), 5.22 (q, *J* = 6.5 Hz, 1H), 4.90 (d, *J* = 5.5 Hz, 1H), 4.79 (d, *J* = 5.5 Hz, 1H), 4.60 (t, *J* = 1.9 Hz, 1H), 3.67 (dd, *J* = 10.5, 2.3 Hz, 1H), 3.51 (dd, *J* = 10.5, 1.7 Hz, 1H), 1.60 (d, *J* = 6.5 Hz, 3H), 1.48 (s, 3H), 1.41 (s, 3H).

<sup>13</sup>C NMR (100 MHz, CDCl<sub>3</sub>, **mixture 2**) δ 174.4, 137.2, 133.9, 130.5, 129.0, 128.3, 126.2, 125.6, 123.4, 122.8, 113.2, 81.0, 78.5, 76.3, 75.8, 67.2, 26.8, 25.7, 22.9.

HRMS (ESI) Calcd. for C<sub>20</sub>H<sub>23</sub>O<sub>5</sub> [(M+H)<sup>+</sup>] 343.1545, found 343.1549.

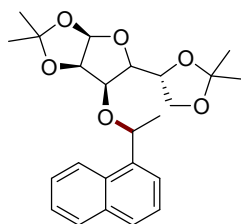

**(3aR,6R,6aR)-5-((R)-2,2-dimethyl-1,3-dioxolan-4-yl)-2,2-dimethyl-6-(1-(naphthalen-1-yl)ethoxy)tetrahydrofuro[2,3-*d*][1,3]dioxole (56):**

According to the general procedure, 1-ethylnaphthalene (78 mg, 0.5 mmol, 1.0 equiv.), (3aR,6R,6aR)-5-((R)-2,2-dimethyl-1,3-dioxolan-4-yl)-2,2-dimethyltetrahydrofuro[2,3-*d*][1,3]dioxol-6-ol (651 mg, 2.5 mmol, 5.0 equiv.), Selectfluor (354 mg, 1.0 mmol, 2.0 equiv.), Ni(acac)<sub>2</sub> (12.9 mg, 0.05 mmol, 10 mol%), bpy (7.8 mg, 0.05 mmol, 10 mol%), [Ir{dF(CF<sub>3</sub>)ppy}<sub>2</sub>(dtbbpy)]PF<sub>6</sub> (5.6 mg, 0.005 mmol, 1 mol%) and 2.5 mL CH<sub>3</sub>CN were used. After 24 hours, the reaction mixture was subjected to the workup protocol outlined in the general procedure and purified by flash chromatography (20 % ethyl acetate/petroleum ether) to provide the title compound as a colourless oil (114 mg, 55 % yield).

**(1.1:1 dr)**

<sup>1</sup>H NMR (400 MHz, CDCl<sub>3</sub>, **mixture 1**) δ 8.21 (d, *J* = 8.0 Hz, 1H), 7.92 - 7.85 (m, 1H), 7.79 (d, *J* = 8.2 Hz, 1H), 7.68 (d, *J* = 6.9 Hz, 1H), 7.56 - 7.44 (m, 3H), 5.66 (d, *J* = 3.9 Hz, 1H), 5.45 (q, *J* = 6.5 Hz, 1H), 4.57 (t, *J* = 4.3 Hz, 1H), 4.29 - 4.17 (m, 2H), 3.84 (t, *J* = 7.6 Hz, 1H), 3.78 - 3.71 (m, 1H), 3.60 (dd, *J* = 8.3, 4.7 Hz, 1H), 1.70 - 1.60 (m, 6H), 1.40 (s, 3H), 1.31 (s, 3H), 1.26 (s, 3H).

<sup>13</sup>C NMR (100 MHz, CDCl<sub>3</sub>, **mixture 1**) δ 138.3, 133.9, 130.7, 129.0, 128.2, 126.0, 125.6, 124.3, 123.1, 112.9, 109.4, 104.3, 78.4, 77.8, 76.2, 75.1, 74.2, 26.9, 26.1, 25.1, 23.9.

HRMS (ESI) Calcd. for C<sub>24</sub>H<sub>31</sub>O<sub>6</sub> [(M+H)<sup>+</sup>] 415.2121, found 415.2129.

<sup>1</sup>H NMR (400 MHz, CDCl<sub>3</sub>, **mixture 2**) δ 8.22 - 8.16 (m, 1H), 7.88 (dd, *J* = 6.7, 2.6 Hz, 1H), 7.80 (d, *J* = 8.1 Hz, 1H), 7.75 (d, *J* = 6.9 Hz, 1H), 7.50 (td, *J* = 7.2, 4.3 Hz, 3H), 5.61 (q, *J* = 6.5 Hz, 1H), 5.49 (d, *J* = 3.5 Hz, 1H), 4.27 (td, *J* = 6.6, 4.5 Hz, 1H), 4.16 (dd, *J* = 8.7, 4.3 Hz, 1H), 4.11 (t, *J* = 3.9 Hz, 1H), 4.08 (dd, *J* = 8.3, 6.3 Hz, 1H), 4.05 - 3.99 (m, 1H), 3.75 (dd, *J* = 8.7, 4.3 Hz, 1H), 1.66 (d, *J* = 6.5 Hz, 3H), 1.60 (s, 3H), 1.56 (s, 3H), 1.41 (s, 3H), 1.24 (s, 3H).

<sup>13</sup>C NMR (100 MHz, CDCl<sub>3</sub>, **mixture 2**) δ 139.4, 133.8, 130.8, 128.8, 128.1, 125.9, 125.6, 125.4, 124.0, 123.44, 112.8, 109.7, 103.1, 79.2, 78.7, 78.3, 77.2, 76.4, 75.2, 65.8, 27.0, 26.6, 26.2, 24.9, 23.3.

HRMS (ESI) Calcd. for  $C_{24}H_{31}O_6$   $[(M+H)^+]$  415.2121, found 415.2123.

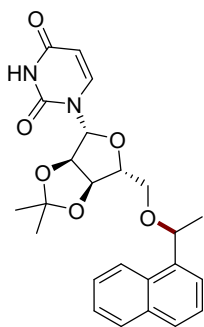

**1-((3aR,4R,6R,6aR)-2,2-dimethyl-6-((1-(naphthalen-1-yl)ethoxy)methyl)tetrahydrofuro[3,4-d][1,3]dioxol-4-yl)pyrimidine-2,4(1H,3H)-dione (57):**

According to the general procedure, 1-ethylnaphthalene (78 mg, 0.5 mmol, 1.0 equiv.), 1-((3aR,4R,6R,6aR)-6-(hydroxymethyl)-2,2-dimethyltetrahydrofuro[3,4-d][1,3]dioxol-4-yl)pyrimidine-2,4(1H,3H)-dione (711 mg, 2.5 mmol, 5.0 equiv.), Selectfluor (354 mg, 1.0 mmol, 2.0 equiv.),  $Ni(acac)_2$  (12.9 mg, 0.05 mmol, 10 mol%), bpy (7.8 mg, 0.05 mmol, 10 mol%),  $[Ir\{dF(CF_3)ppy\}_2(dtbbpy)]PF_6$  (5.6 mg, 0.005 mmol, 1 mol%) and 2.5 mL  $CH_3CN$  were used. After 24 hours, the reaction mixture was subjected to the workup protocol outlined in the general procedure and purified by flash chromatography (50 % ethyl acetate/petroleum ether) to provide the title compound as a white solid (160 mg, 73 % yield).

**(1:1 dr)**

$^1H$  NMR (400 MHz,  $CDCl_3$ , **mixture**)  $\delta$  9.26 (9.11) (s, 1H), 8.22 - 8.03 (m, 1H), 7.92 - 7.83 (m, 1H), 7.81 - 7.77 (m, 1H), 7.73 - 7.39 (m, 5H), 5.94 (5.90) (d,  $J = 2.6$  Hz, 1H), 5.71 - 5.68 (5.27 - 5.23) (m, 1H), 5.20 - 5.10 (m, 1H), 4.87 - 4.68 (m, 2H), 4.43 - 4.34 (m, 1H), 3.81 - 3.48 (m, 2H), 1.67 - 1.63 (m, 3H), 1.58 (1.57) (s, 3H), 1.35 (1.32) (s, 3H).

$^{13}C$  NMR (100 MHz,  $CDCl_3$ , **mixture**)  $\delta$  163.3, 163.1, 150.1, 150.0, 141.1, 140.8, 138.1, 137.9, 134.0, 133.9, 130.5, 129.1, 128.4, 128.3, 126.1, 125.9, 125.7, 125.4, 125.3, 123.9, 123.3, 123.2, 123.0, 114.3, 114.0, 102.0, 93.1, 92.0, 85.9, 85.6, 85.2, 84.8, 81.1, 80.8, 77.2, 76.3, 68.9, 68.5, 27.2, 25.4, 25.3, 22.9, 22.1.

HRMS (ESI) Calcd. for  $C_{24}H_{27}N_2O_6$   $[(M+H)^+]$  439.1869, found 439.1877.

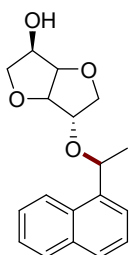

**(3R,6S)-6-(1-(naphthalen-1-yl)ethoxy)hexahydrofuro[3,2-b]furan-3-ol (58):**

According to the general procedure, 1-ethylnaphthalene (78 mg, 0.5 mmol, 1.0 equiv.), isosorbide (365 mg, 2.5 mmol, 5.0 equiv.), Selectfluor (354 mg, 1.0 mmol, 2.0 equiv.),  $Ni(acac)_2$  (12.9 mg, 0.05 mmol, 10 mol%), bpy (7.8 mg, 0.05 mmol, 10 mol%),  $[Ir\{dF(CF_3)ppy\}_2(dtbbpy)]PF_6$  (5.6 mg, 0.005 mmol, 1 mol%) and 2.5 mL  $CH_3CN$  were used. After 24 hours, the reaction mixture was subjected to the workup protocol outlined in the general procedure and purified by flash

chromatography (50 % ethyl acetate/petroleum ether) to provide the title compound as a colourless oil (107 mg, 71 % yield).

**(1.1:1 dr)**

<sup>1</sup>H NMR (400 MHz, CDCl<sub>3</sub>, **mixture**) δ 8.17 - 8.13 (m, 1H), 7.92 - 7.83 (m, 1H), 7.78 (d, *J* = 8.1 Hz, 1H), 7.62 - 7.37 (m, 4H), 5.33 - 5.19 (m, 1H), 4.71 - 4.69 (4.62 - 4.59) (m, 1H), 4.62 - 4.59 (4.39 - 4.37) (m, 1H), 4.31 - 4.20 (m, 1H), 4.20 - 4.17 (4.09 - 4.06) (m, 1H), 4.01 - 3.94 (m, 1H), 3.86 - 3.70 (m, 2H), 3.49 - 3.40 (m, 1H), 2.62 (br, 1H), 1.66 - 1.58 (m, 3H).

<sup>13</sup>C NMR (100 MHz, CDCl<sub>3</sub>, **mixture**) δ 138.7, 134.0, 130.7, 130.5, 129.0, 128.3, 128.2, 126.1, 125.6, 125.5, 123.9, 123.8, 123.4, 123.3, 86.6, 86.2, 82.1, 81.8, 75.3, 74.8, 74.2, 73.5, 73.4, 73.3, 72.3, 72.2, 23.7.

HRMS (ESI) Calcd. for C<sub>18</sub>H<sub>21</sub>O<sub>4</sub> [(M+H)<sup>+</sup>] 301.1440, found 301.1444.

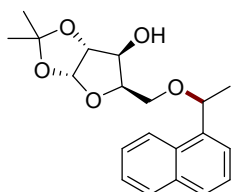

**(3aR,5R,6S,6aR)-2,2-dimethyl-5-((1-(naphthalen-1-yl)ethoxy)methyl)tetrahydrofuro[2,3-d][1,3]dioxol-6-ol (59):**

According to the general procedure, 1-ethylnaphthalene (78 mg, 0.5 mmol, 1.0 equiv.), (3aR,5R,6S,6aR)-5-(hydroxymethyl)-2,2-dimethyltetrahydrofuro[2,3-*d*][1,3]dioxol-6-ol (475 mg, 2.5 mmol, 5.0 equiv.), Selectfluor (354 mg, 1.0 mmol, 2.0 equiv.), Ni(acac)<sub>2</sub> (12.9 mg, 0.05 mmol, 10 mol%), bpy (7.8 mg, 0.05 mmol, 10 mol%), [Ir{dF(CF<sub>3</sub>)ppy}<sub>2</sub>(dtbbpy)]PF<sub>6</sub> (5.6 mg, 0.005 mmol, 1 mol%) and 2.5 mL CH<sub>3</sub>CN were used. After 24 hours, the reaction mixture was subjected to the workup protocol outlined in the general procedure and purified by flash chromatography (50 % ethyl acetate/petroleum ether) to provide the title compound as a colourless oil (132 mg, 77 % yield).

**(1.13:1 dr)**

<sup>1</sup>H NMR (400 MHz, CDCl<sub>3</sub>, **mixture**) δ 8.18 - 8.07 (m, 1H), 7.88 (7.86) (s, H), 7.80 - 7.78 (m, 1H), 7.62 - 7.41 (m, 4H), 6.01 (5.95) (d, *J* = 3.7 Hz, 1H), 5.35 (5.24) (q, *J* = 6.5 Hz, 1H), 4.54 (4.49) (d, *J* = 3.7 Hz, 1H), 4.33 - 4.27 (m, 1H), 4.24 (4.16) (dd, *J* = 6.8, 3.5 Hz, 1H), 4.04 (3.49) (br, 1H), 3.93 - 3.76 (m, 2H), 1.66 - 1.63 (m, 3H), 1.47 (1.45) (s, 3H), 1.32 (1.31) (s, 3H).

<sup>13</sup>C NMR (100 MHz, CDCl<sub>3</sub>, **mixture**) δ 138.1, 137.9, 134.0, 130.7, 130.6, 129.1, 129.0, 128.2, 126.2, 126.1, 125.7, 125.6, 123.6, 123.5, 123.1, 123.0, 111.6, 104.9, 85.4, 78.1, 77.3, 77.0, 76.5, 67.0, 66.8, 26.8, 26.7, 26.2, 23.2.

HRMS (ESI) Calcd. for C<sub>20</sub>H<sub>25</sub>O<sub>5</sub> [(M+H)<sup>+</sup>] 345.1702, found 345.1707.

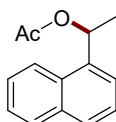

**1-(naphthalen-1-yl)ethyl acetate:**

According to the general procedure, 1-ethylnaphthalene (78 mg, 0.5 mmol, 1.0 equiv.), acetic acid (150 mg, 2.5 mmol, 5.0 equiv.), Selectfluor (354 mg, 1.0 mmol, 2.0 equiv.), Ni(acac)<sub>2</sub> (12.9 mg, 0.05 mmol, 10 mol%), bpy (7.8 mg, 0.05 mmol, 10 mol%), [Ir{dF(CF<sub>3</sub>)ppy}<sub>2</sub>(dtbbpy)]PF<sub>6</sub> (5.6 mg,

0.005 mmol, 1 mol%) and 2.5 mL CH<sub>3</sub>CN were used. After 24 hours, the reaction mixture was subjected to the workup protocol outlined in the general procedure and purified by flash chromatography (5 % ethyl acetate/petroleum ether) to provide the title compound as a colourless oil (80 mg, 75 % yield).

<sup>1</sup>H NMR (400 MHz, CDCl<sub>3</sub>) δ 8.08 (d, *J* = 8.3 Hz, 1H), 7.87 (d, *J* = 7.7 Hz, 1H), 7.80 (d, *J* = 8.2 Hz, 1H), 7.60 (d, *J* = 7.1 Hz, 1H), 7.56 - 7.42 (m, 3H), 6.65 (q, *J* = 6.6 Hz, 1H), 2.12 (s, 3H), 1.70 (d, *J* = 6.6 Hz, 3H).

<sup>13</sup>C NMR (100 MHz, CDCl<sub>3</sub>) δ 170.3, 137.4, 133.8, 130.2, 128.9, 128.4, 126.3, 125.6, 125.3, 123.2, 123.1, 69.4, 21.7, 21.3.

HRMS (ESI) Calcd. for C<sub>14</sub>H<sub>15</sub>O<sub>2</sub> [(M+H)<sup>+</sup>] 215.1072, found 215.1074.

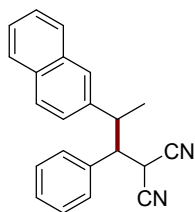

### 2-(2-(naphthalen-2-yl)-1-phenylpropyl)malononitrile:

According to the general procedure, 1-ethylnaphthalene (78 mg, 0.5 mmol, 1.0 equiv.), *d*<sup>4</sup>-MeOH (90 mg, 2.5 mmol, 5.0 equiv.), 2-benzylidenemalononitrile (154 mg, 1.0 mmol, 2.0 equiv.), Selectfluor (354 mg, 1.0 mmol, 2.0 equiv.), Ni(acac)<sub>2</sub> (12.9 mg, 0.05 mmol, 10 mol%), bpy (7.8 mg, 0.05 mmol, 10 mol%), [Ir{dF(CF<sub>3</sub>)ppy}<sub>2</sub>(dtbbpy)]PF<sub>6</sub> (5.6 mg, 0.005 mmol, 1 mol%) and 2.5 mL CH<sub>3</sub>CN were used. After 24 hours, the reaction mixture was subjected to the workup protocol outlined in the general procedure and purified by flash chromatography (10 % ethyl acetate/petroleum ether) to provide the title compound as a colourless oil (20 mg, 13 % yield).

<sup>1</sup>H NMR (400 MHz, CDCl<sub>3</sub>) δ 8.07 (d, *J* = 8.6 Hz, 1H), 7.71 (d, *J* = 8.1 Hz, 1H), 7.55 (d, *J* = 8.1 Hz, 1H), 7.47 (t, *J* = 7.2 Hz, 1H), 7.38 (t, *J* = 7.2 Hz, 1H), 7.23 (t, *J* = 7.7 Hz, 1H), 7.12 (d, *J* = 6.0 Hz, 3H), 7.06 (dd, *J* = 10.5, 5.2 Hz, 3H), 4.49 - 4.30 (m, 1H), 4.24 (d, *J* = 4.9 Hz, 1H), 3.76 - 3.61 (m, 1H), 1.53 (d, *J* = 6.6 Hz, 3H).

<sup>13</sup>C NMR (100 MHz, CDCl<sub>3</sub>) δ 138.4, 136.1, 133.9, 131.0, 129.1, 128.6, 128.5, 128.2, 127.4, 126.4, 125.6, 125.1, 122.2, 112.2, 111.9, 51.9, 29.7, 28.0, 20.9.

HRMS (ESI) Calcd. for C<sub>22</sub>H<sub>19</sub>N<sub>2</sub> [(M+H)<sup>+</sup>] 311.1543, found 311.1551.

#### 4. References

- [1] J.-B. Xia, C. Zhu, C. Chen, *J. Am. Chem. Soc.*, **2013**, *135*, 17494-17500.
- [2] J.-B. Xia, C. Zhu, C. Chen, *Chem. Commun.*, **2014**, *50*, 11701-11704.
- [3] D. Cantillo, O. de Frutos, J. A. Rincon, C. Mateos, C. O. Kappe, *J. Org. Chem.*, **2014**, *79*, 8486-8490.
- [4] K. E. Danahy, J. C. Cooper, J. F. Van Humbeck, *Angew. Chem. Int. Ed.*, **2018**, *57*, 5134-5138.
- [5] J. B. McManus, J. D. Griffin, A. R. White, D. A. Nicewicz, *J. Am. Chem. Soc.*, **2020**, *142*, 10325-10330.
- [6] Y. Tanaka, O. Kurasawa, A. Yokota, M. G. Klein, B. Saito, S. Matsumoto, M. Okaniwa, G. Ambrus-Aikelin, N. Uchiyama, D. Morishita, H. Kimura, S. Imamura, *ACS Med. Chem. Lett.*, **2020**, *11*, 1645-1652.
- [7] F. Shi, J. K. Shen, D. Chen, Ka. Fog, K. Thirstrup, M. Hentzer, J.-Ja. Karlsson, V. Menon, K. A. Jones, K. E. Smith, G. Smith, *ACS Med. Chem. Lett.*, **2011**, *2*, 303-306.
- [8] L.-G. Milroy, B. Koning, D. S. V. Scheppingen, N. G. L. Jager, J. H. Beijnen, J. Koek, L. Brunsveld, *Bioorg. Med. Chem. Lett.*, **2018**, *28*, 1352-1356.
- [9] B. J. Lee, K. S. DeGlopper, T. P. Yoon, *Angew. Chem. Int. Ed.*, **2020**, *59*, 197-202.

## 5. Spectral Data for Products

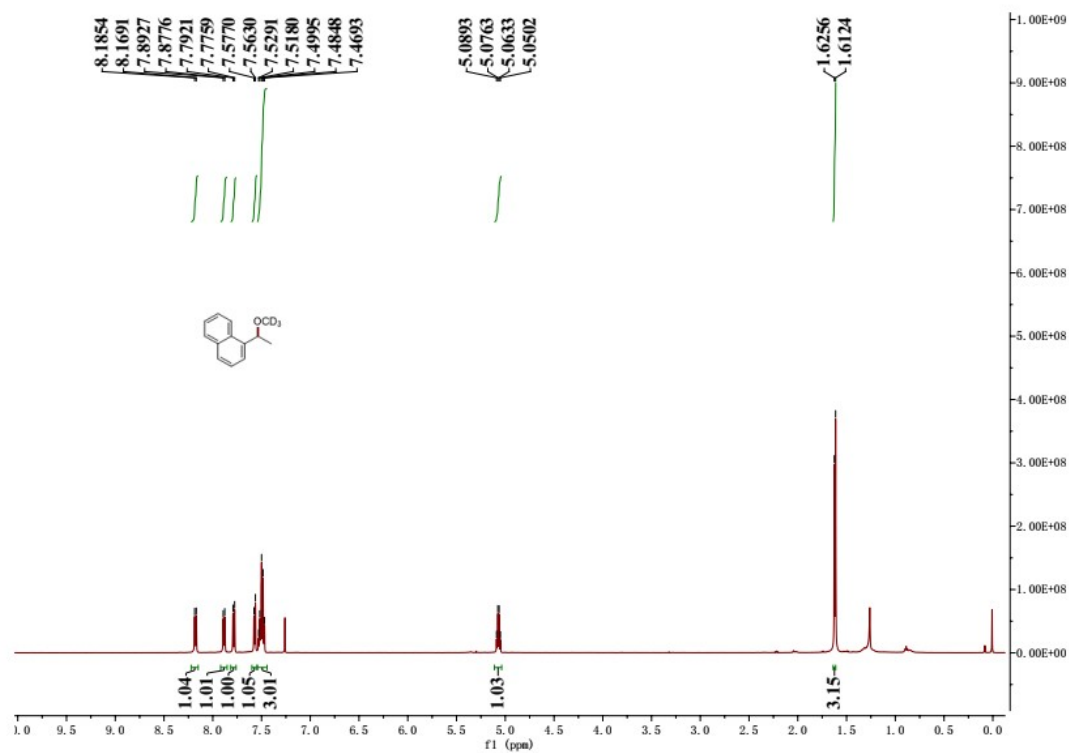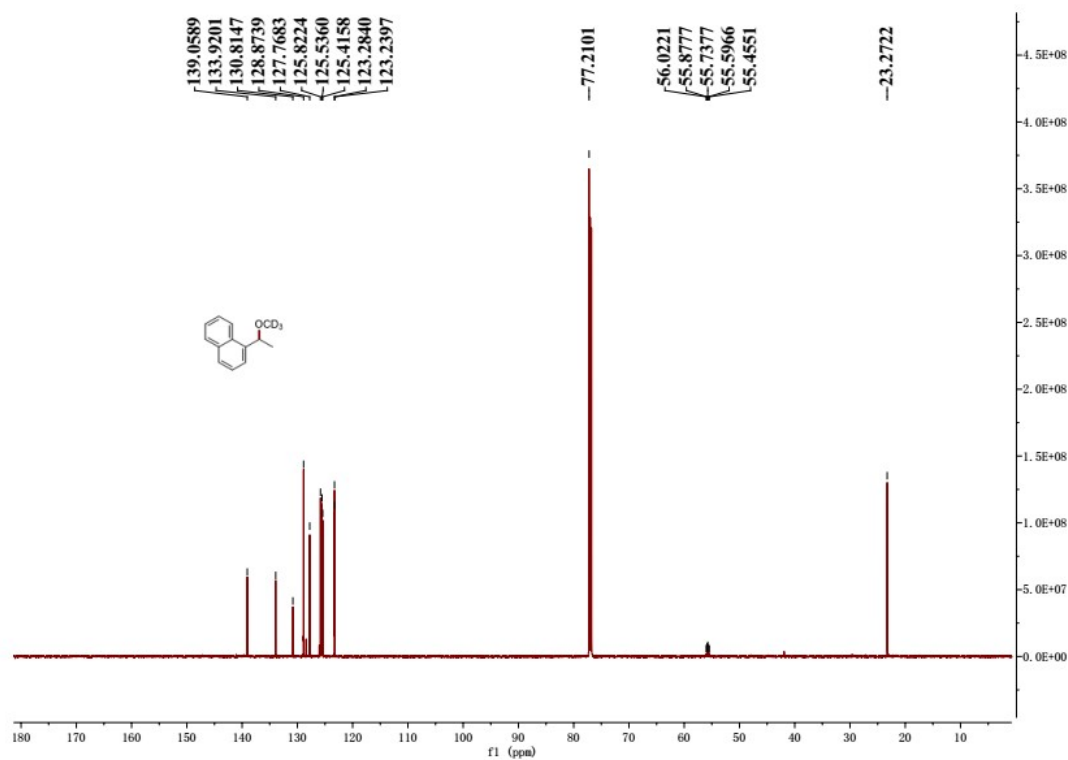

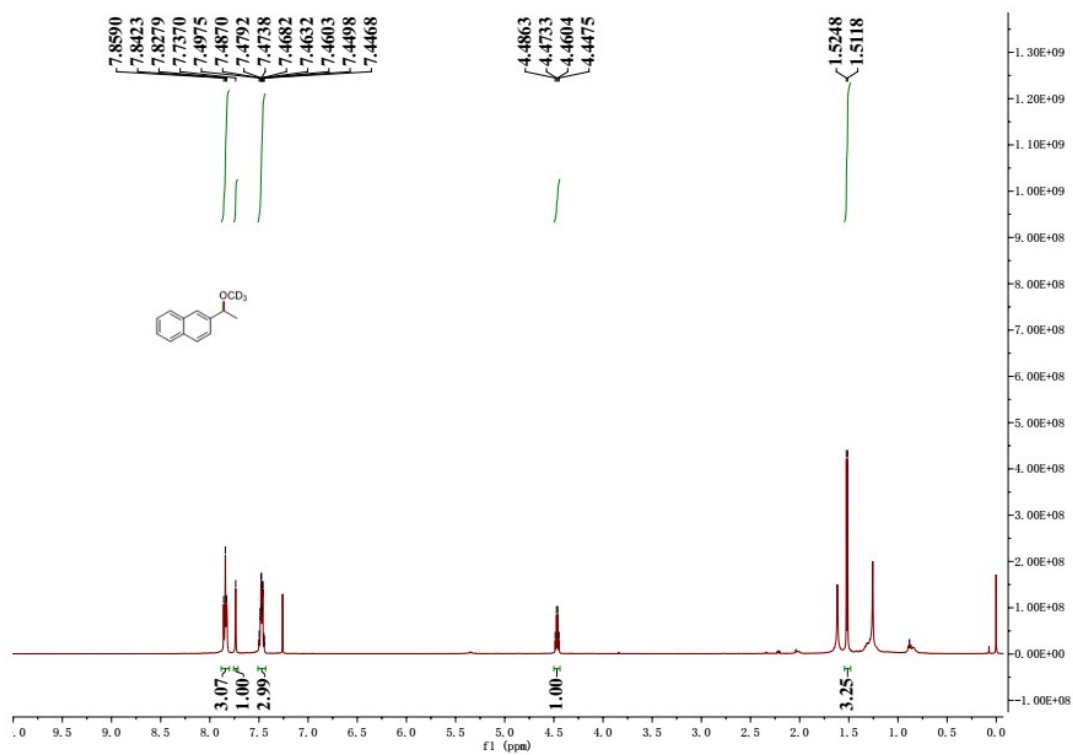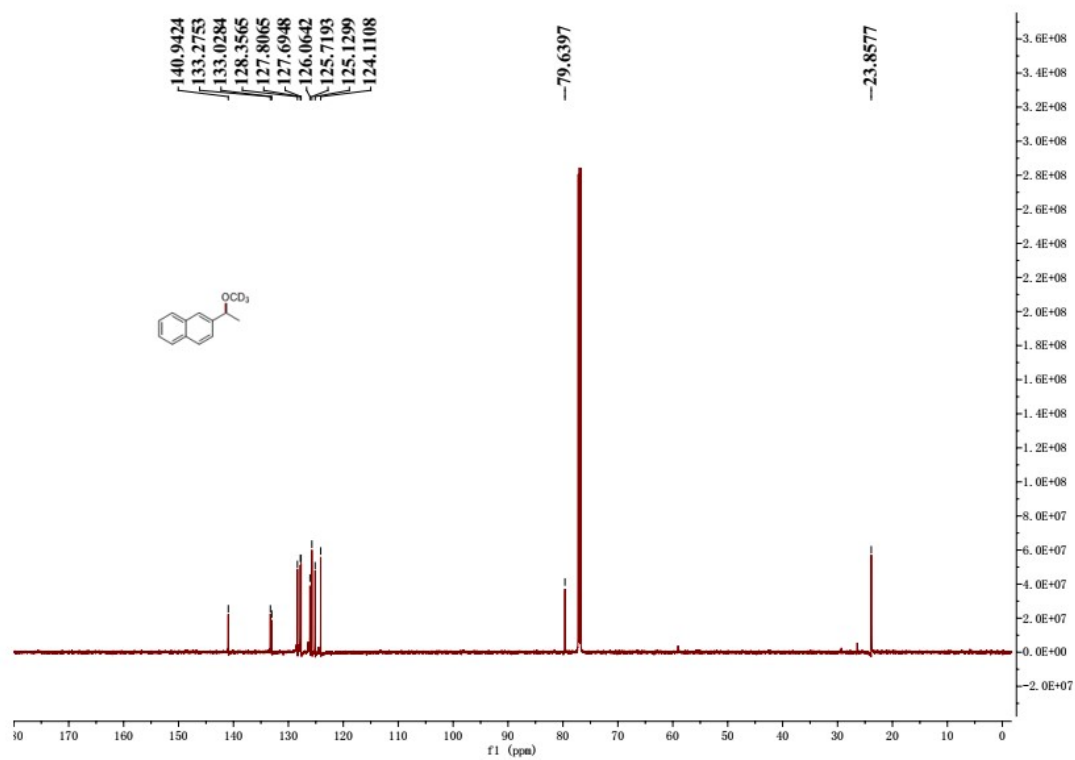



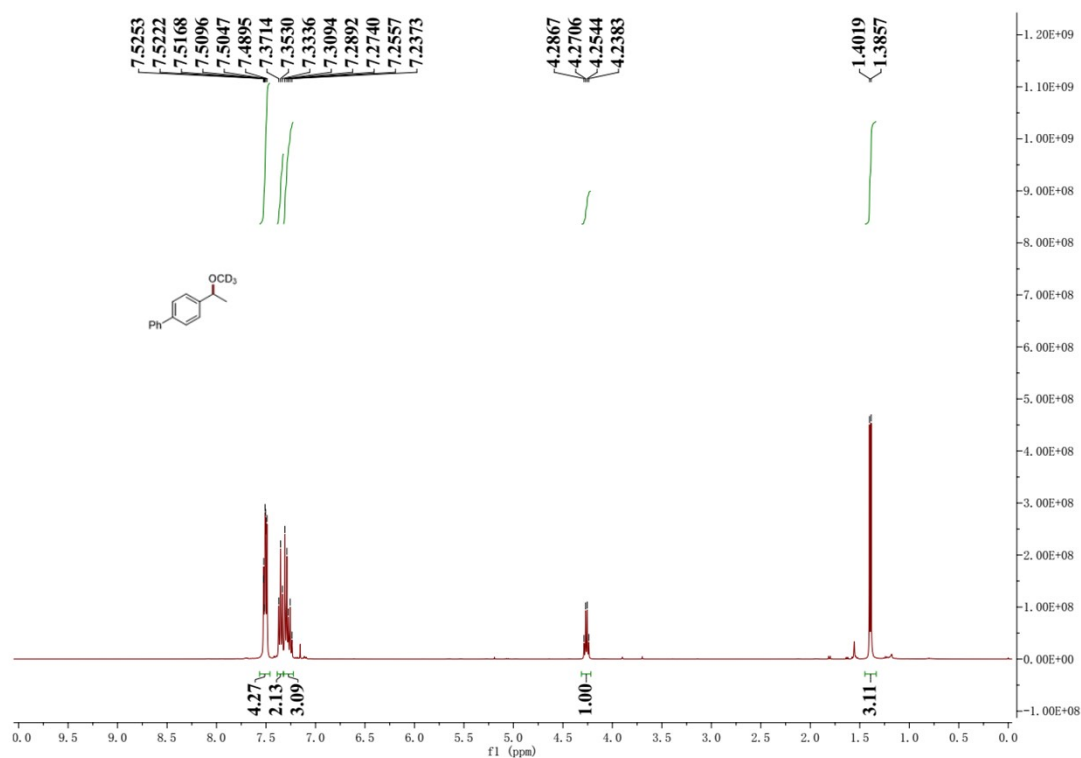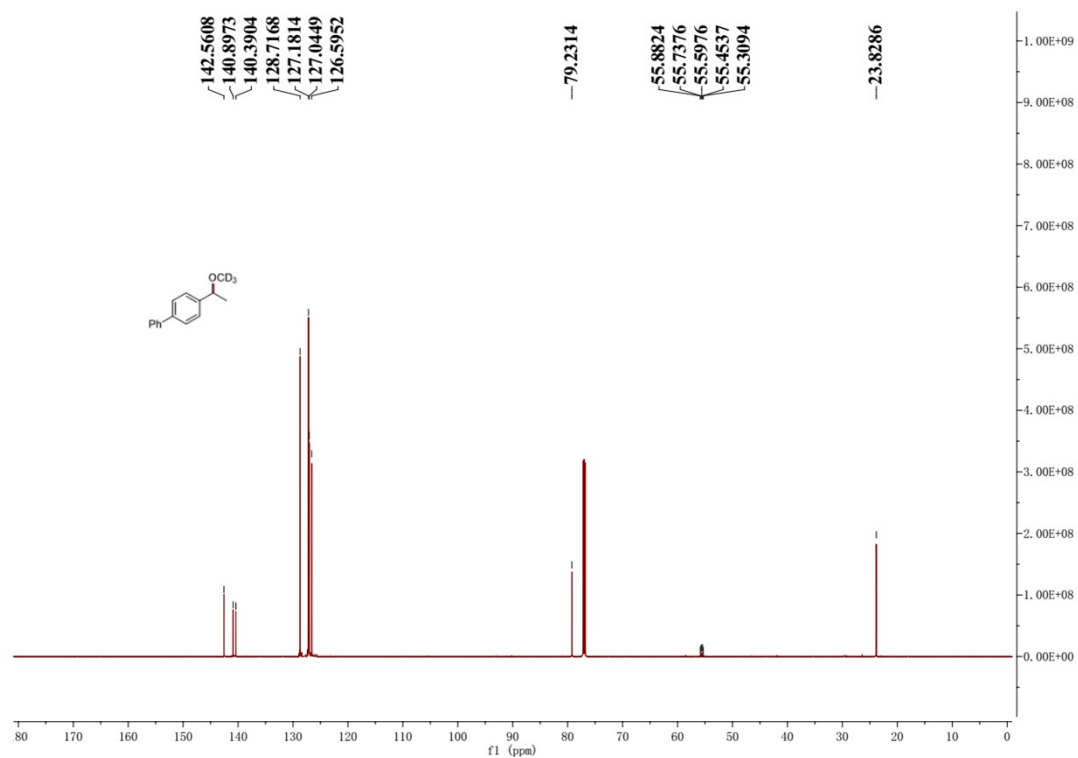

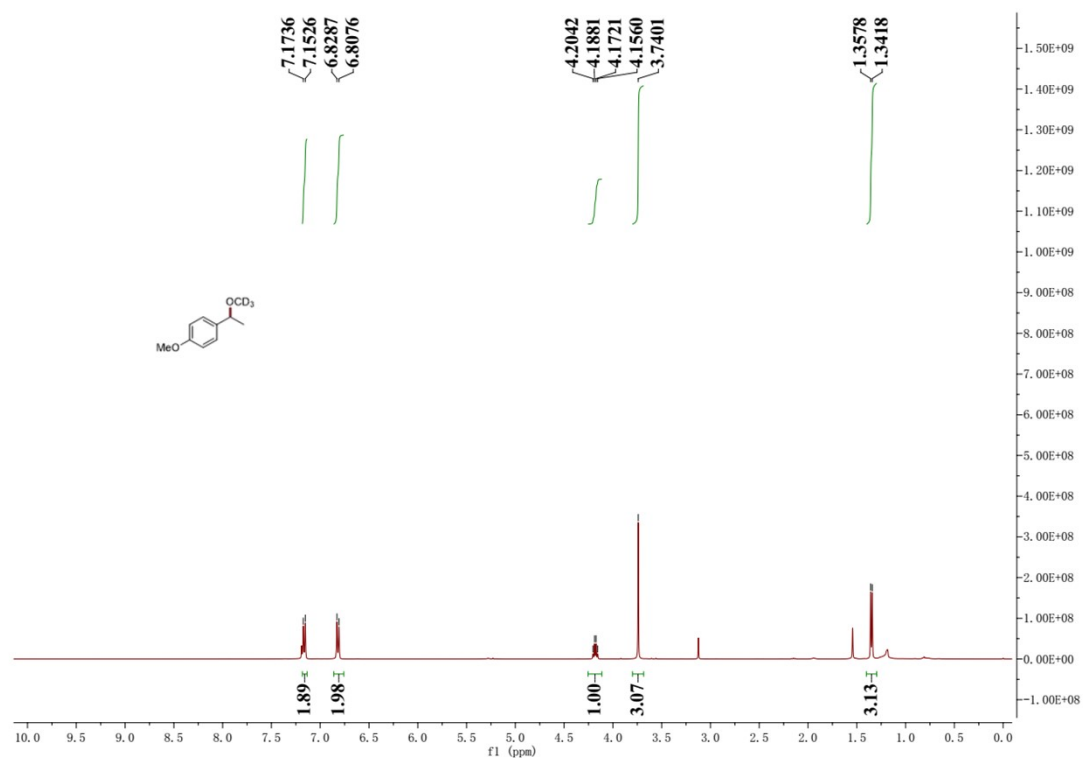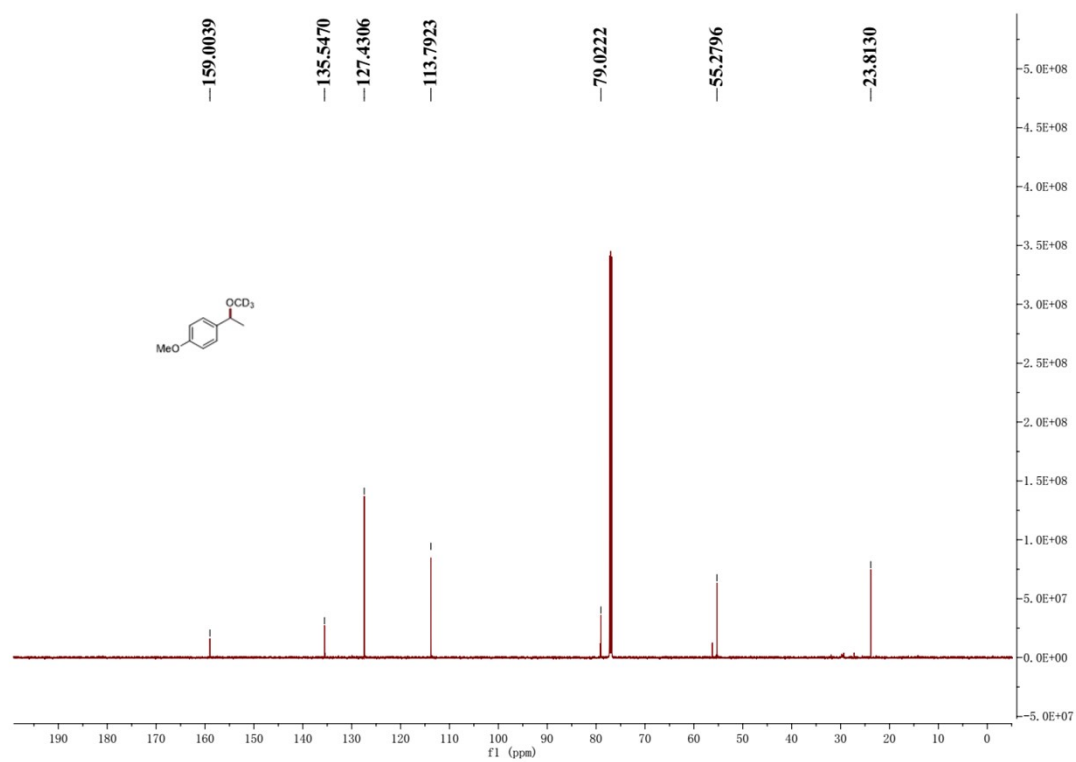

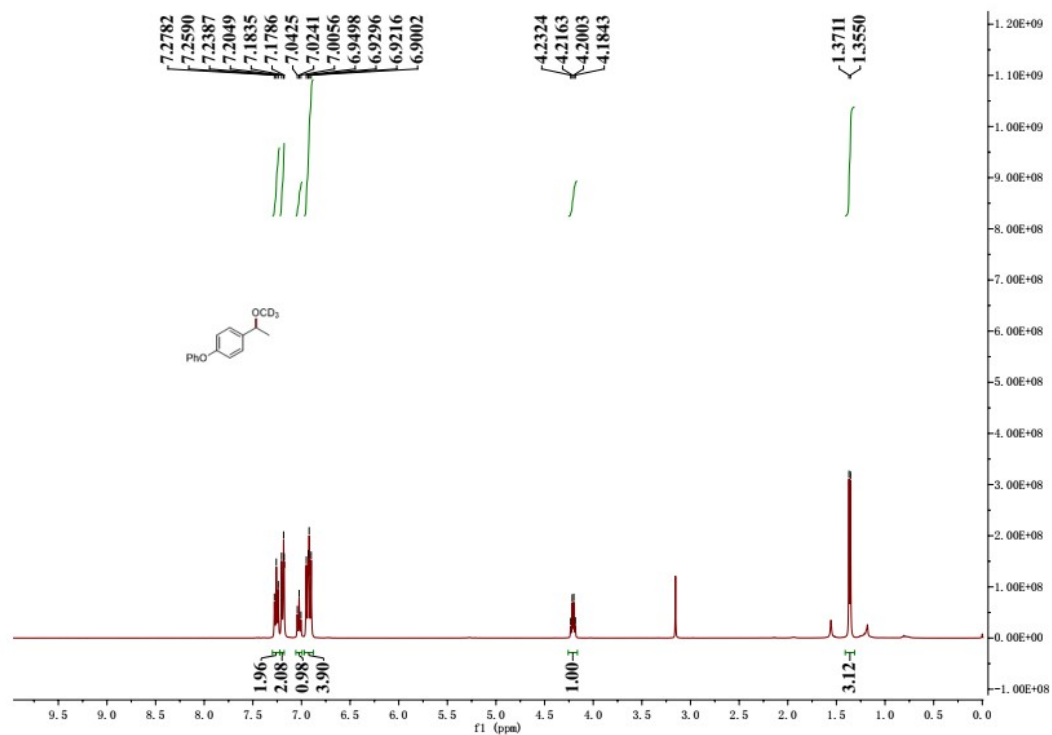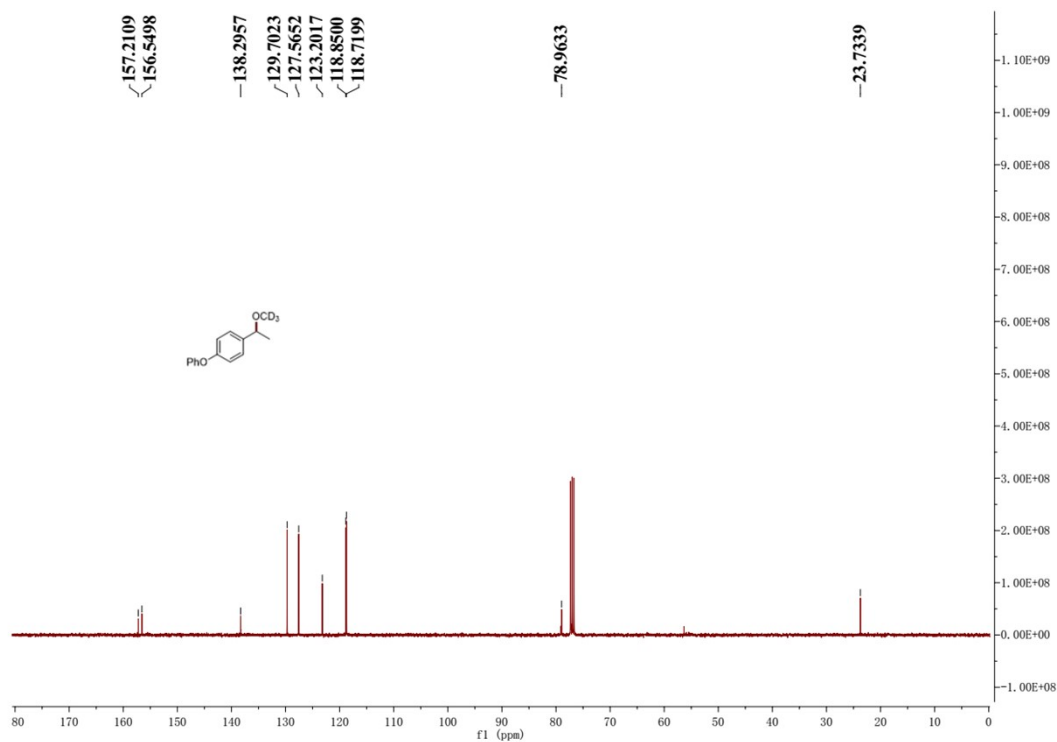

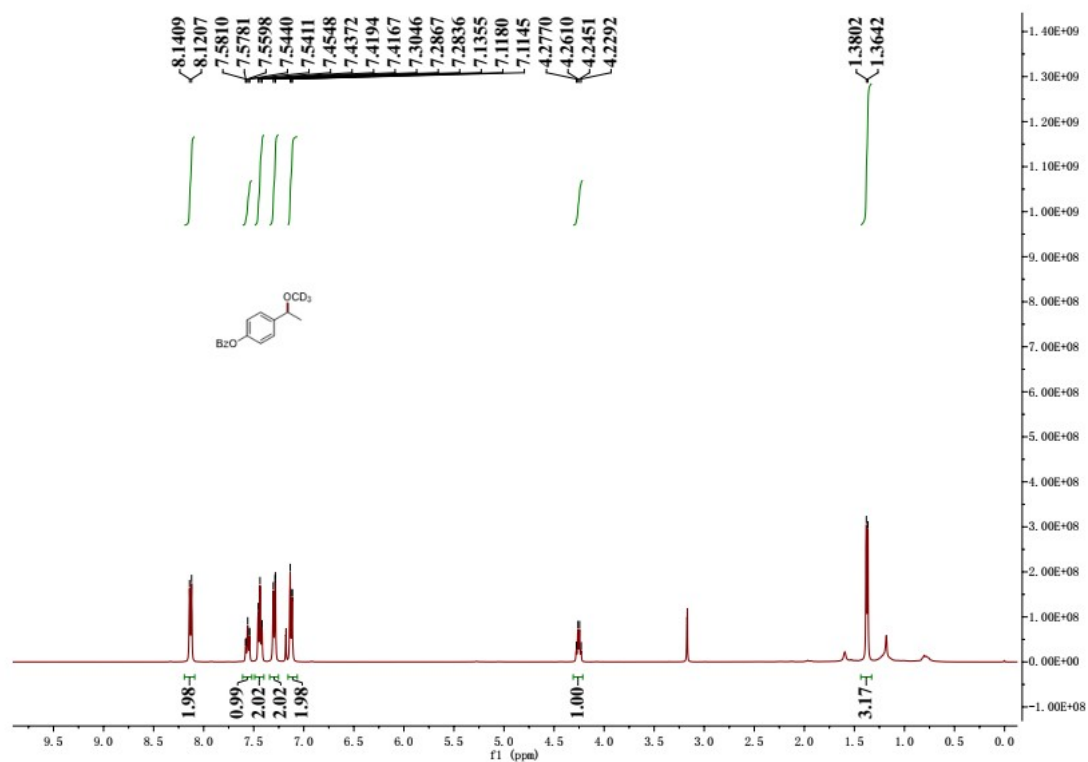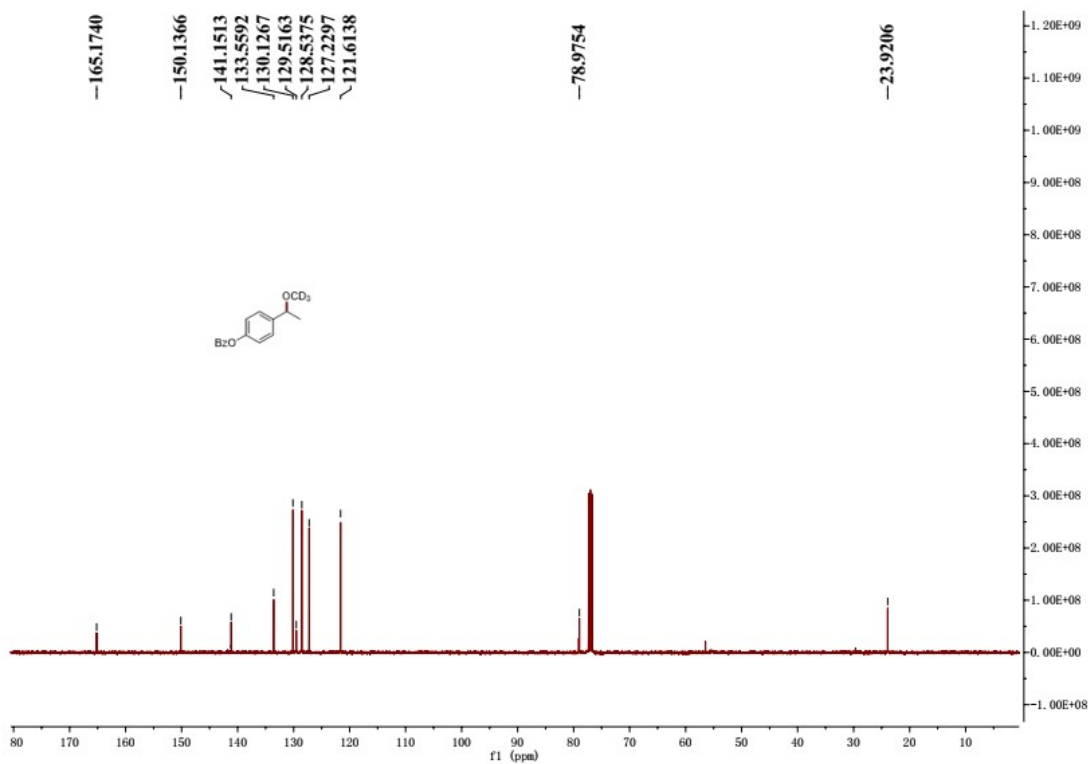

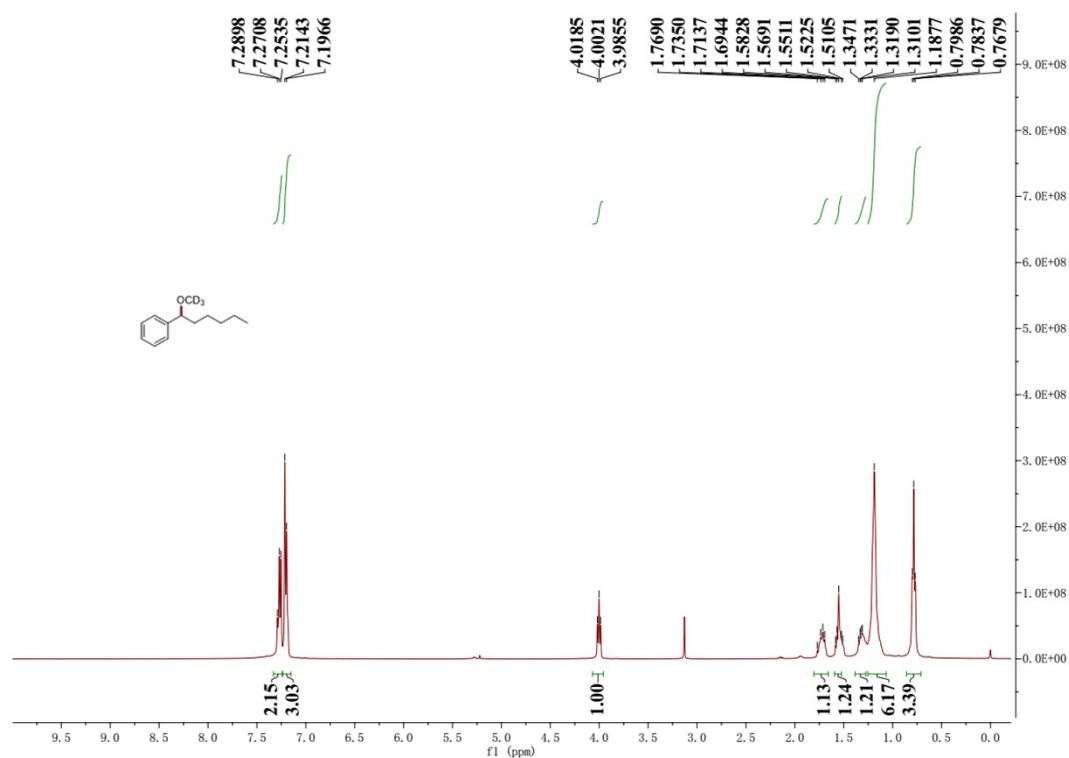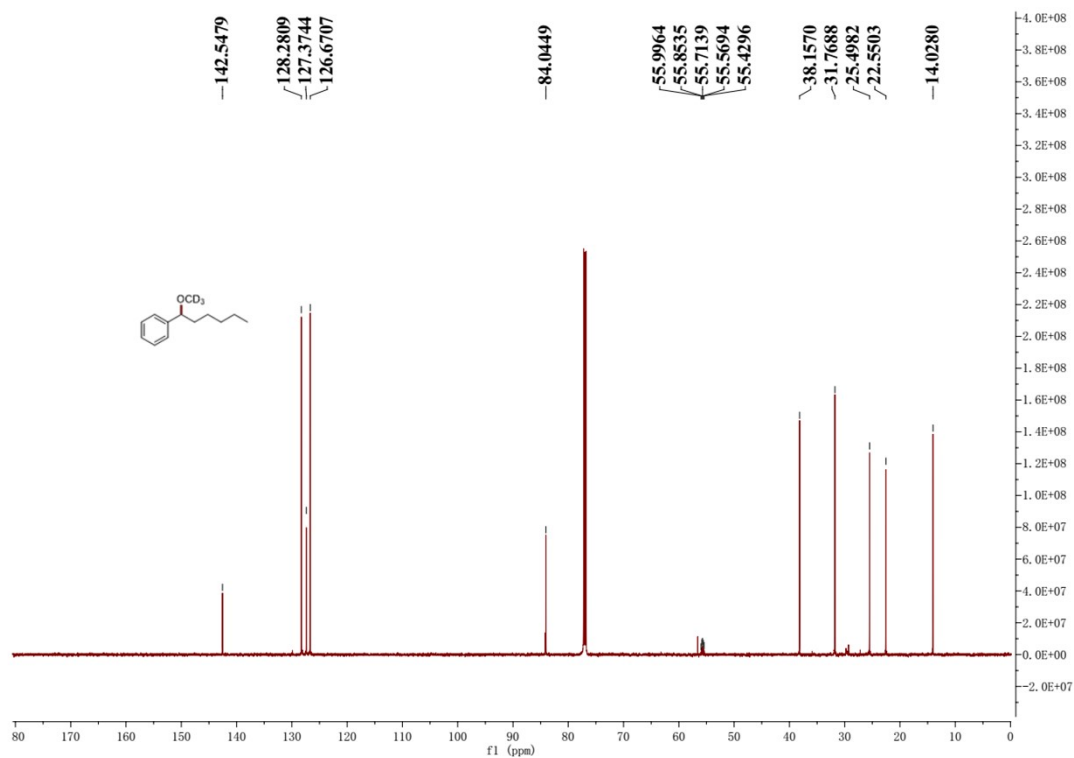

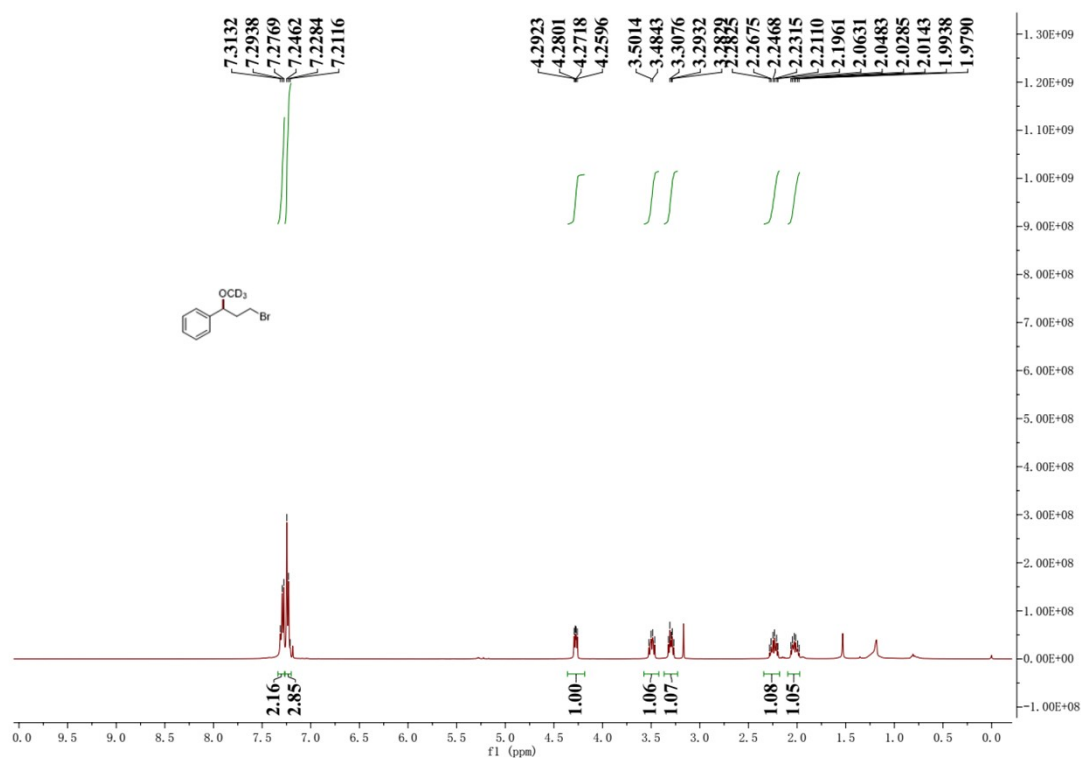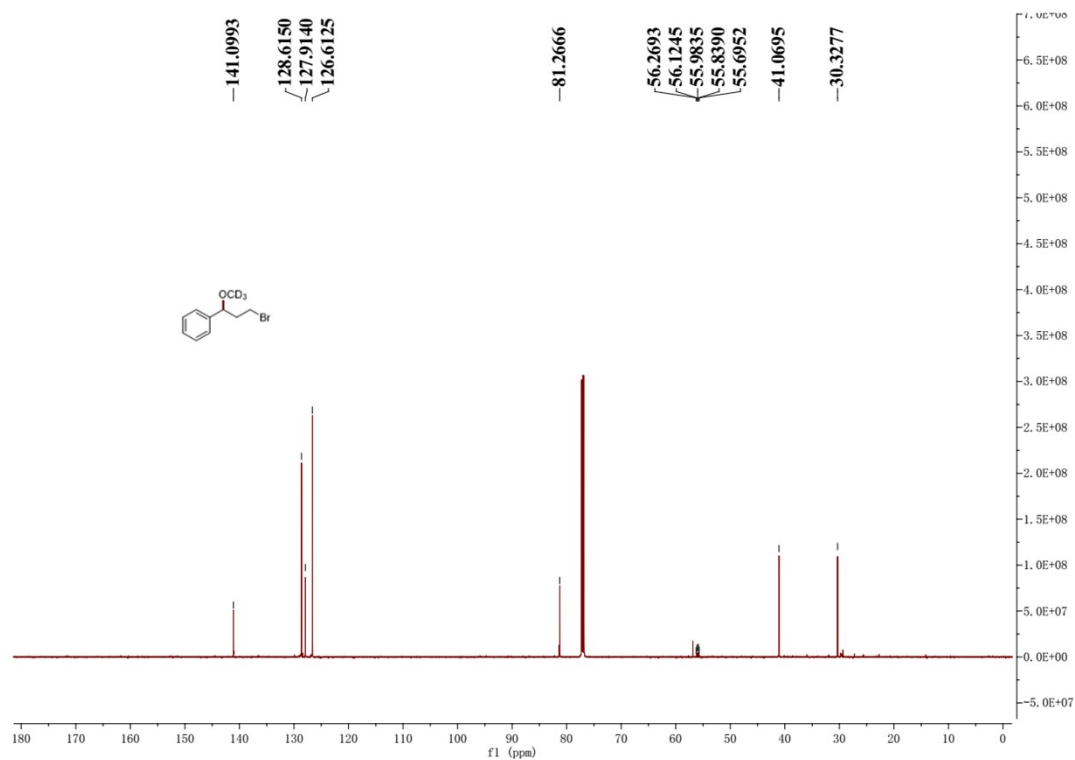

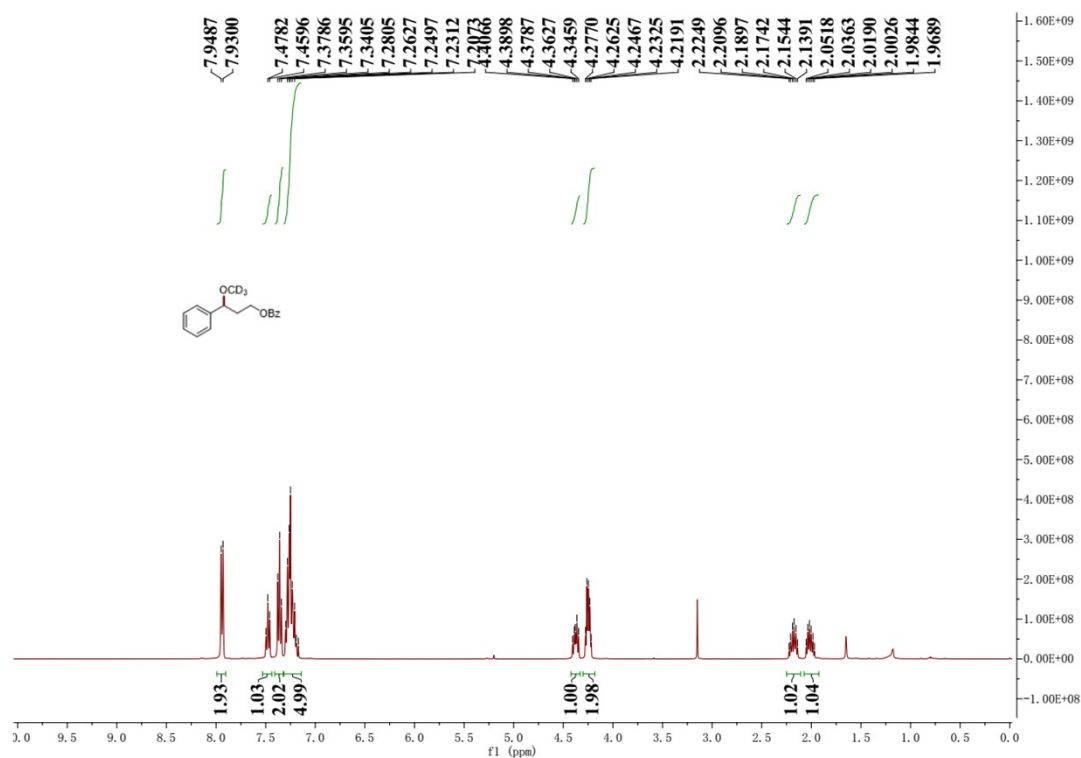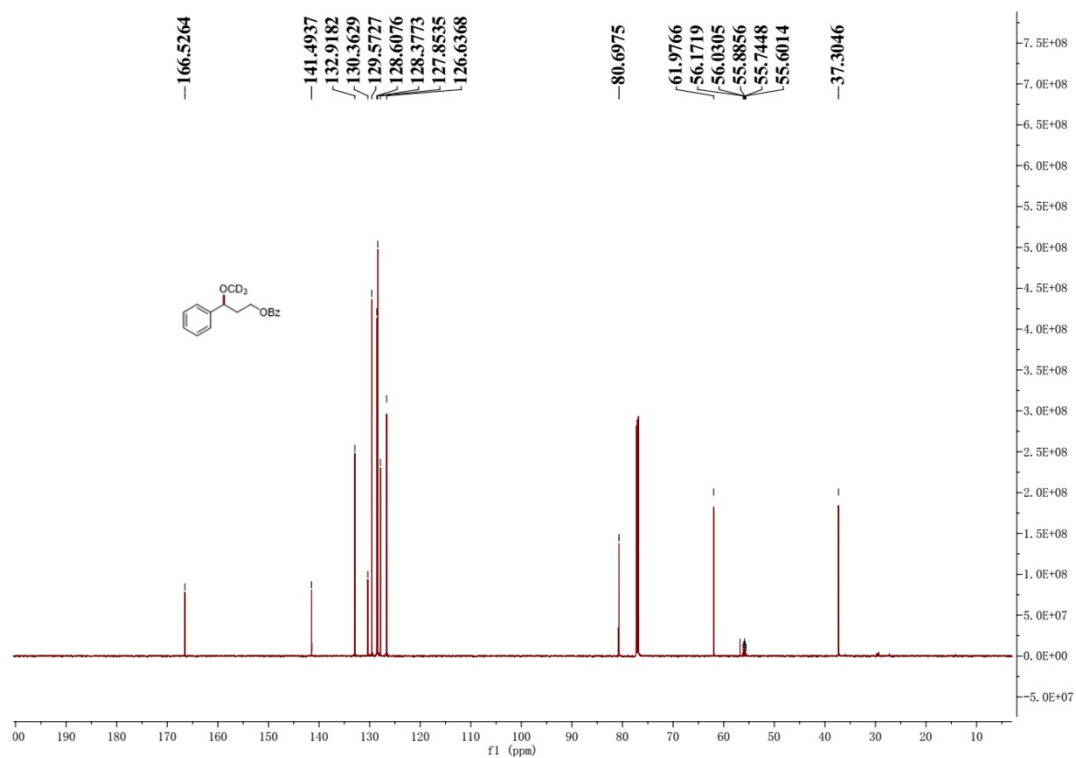

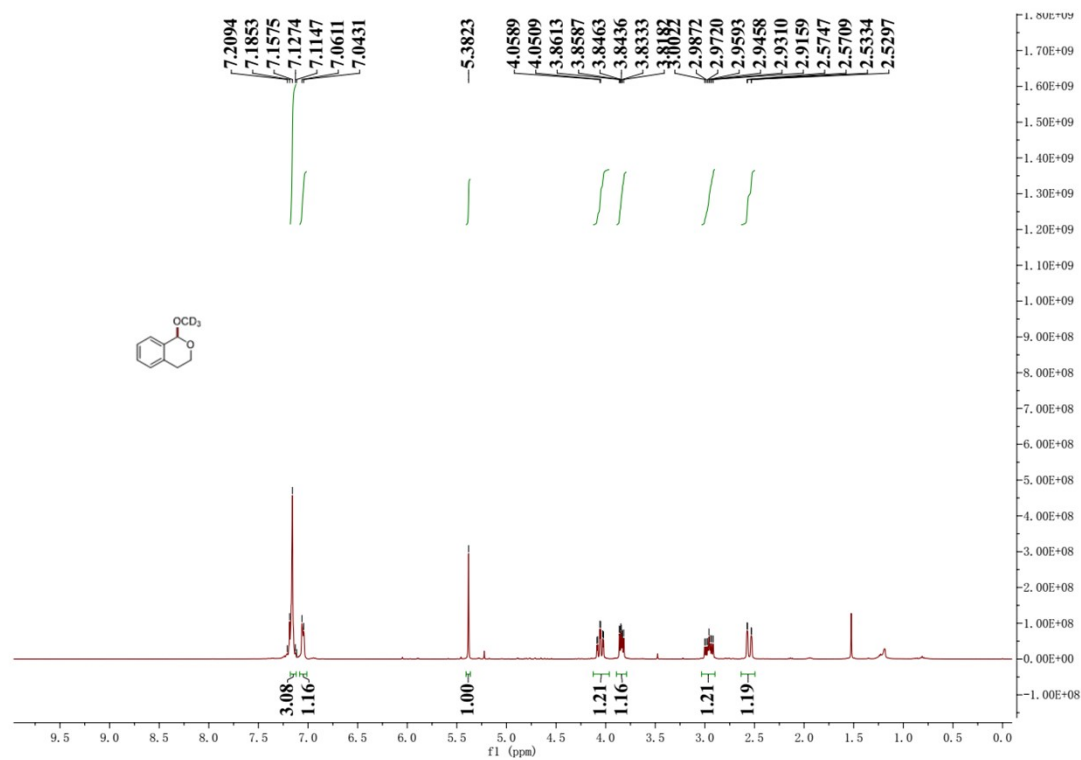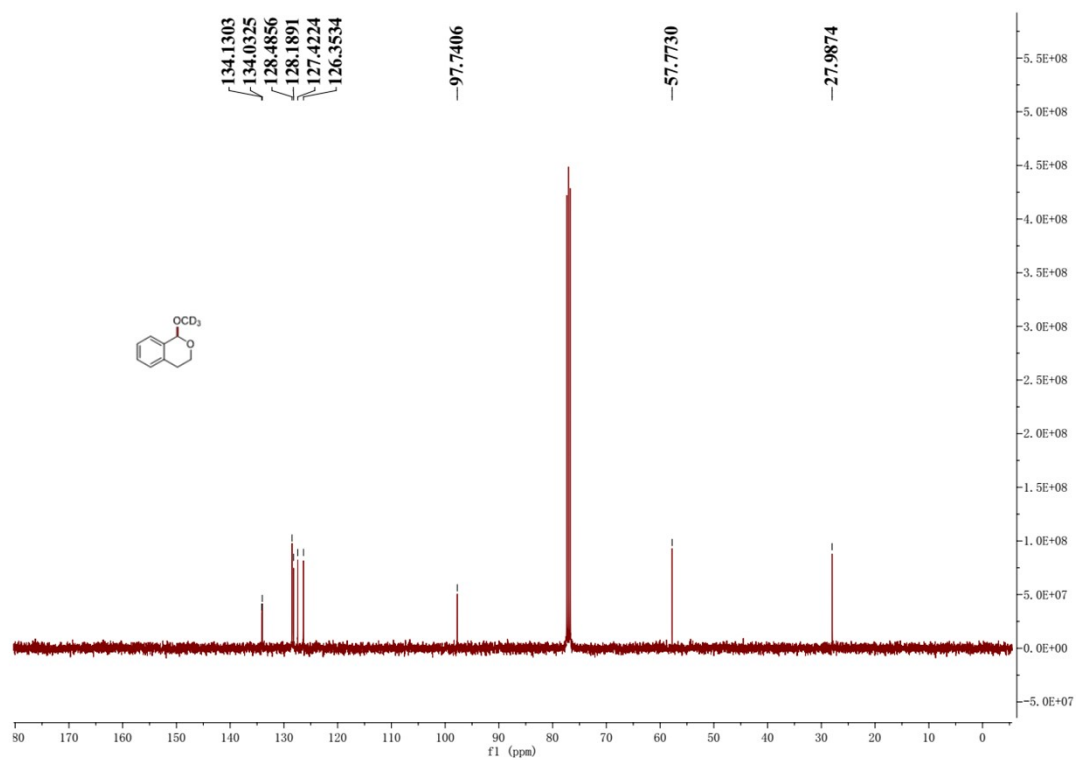



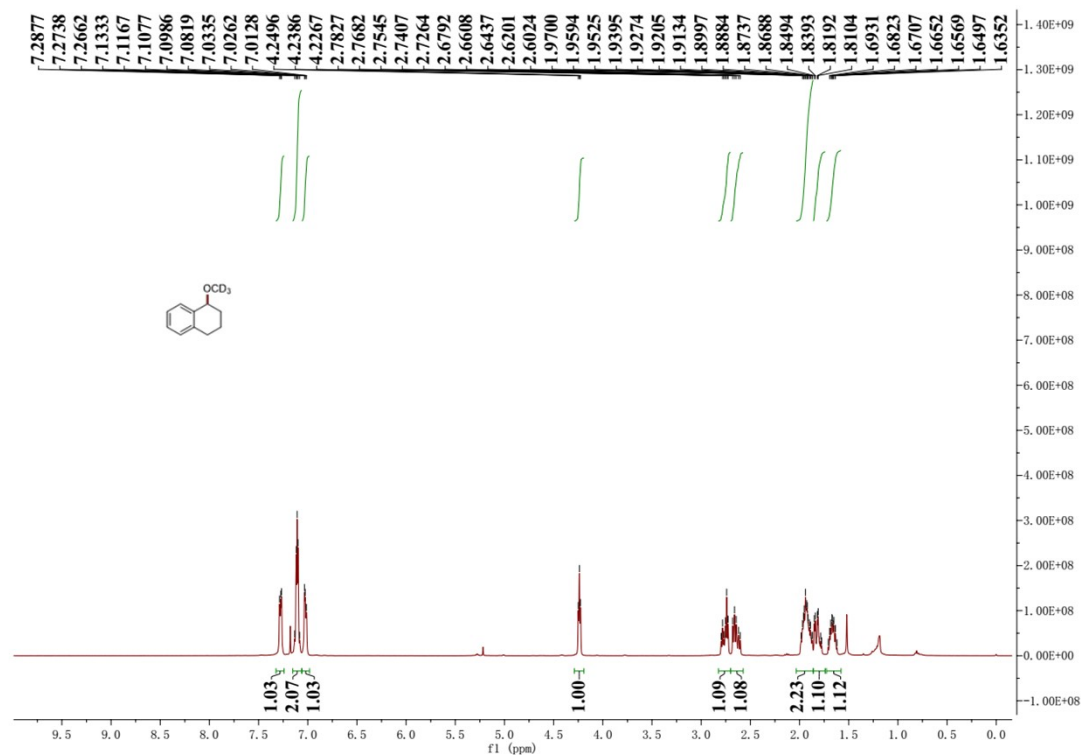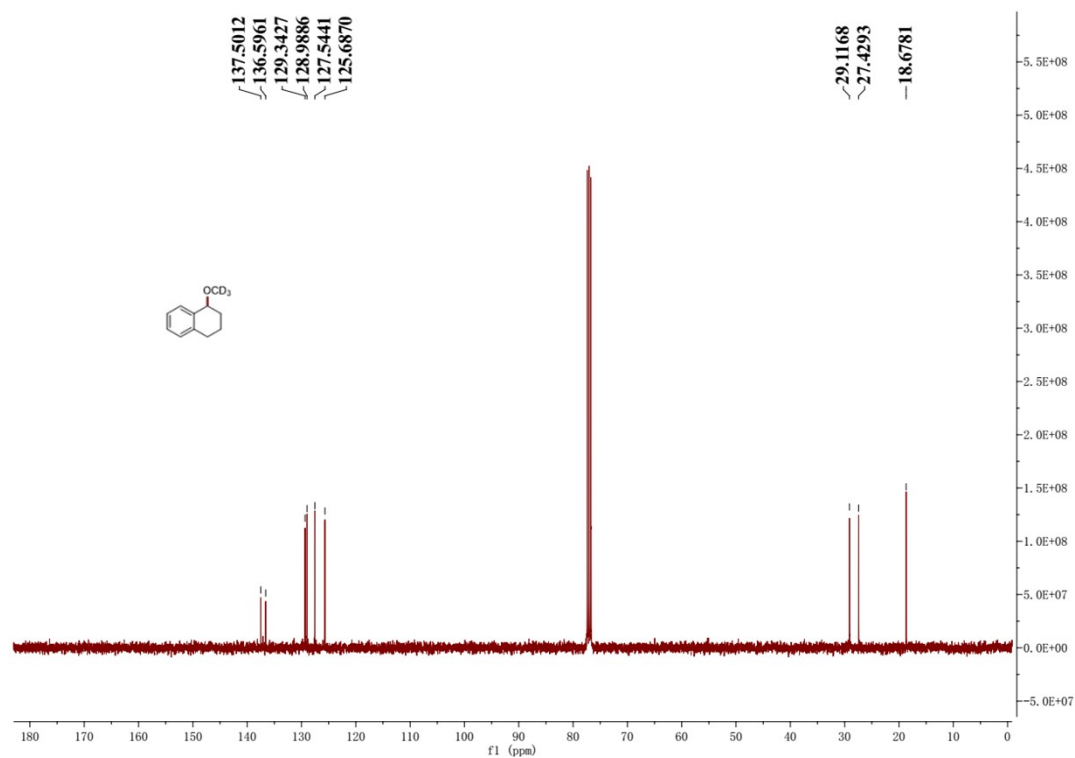

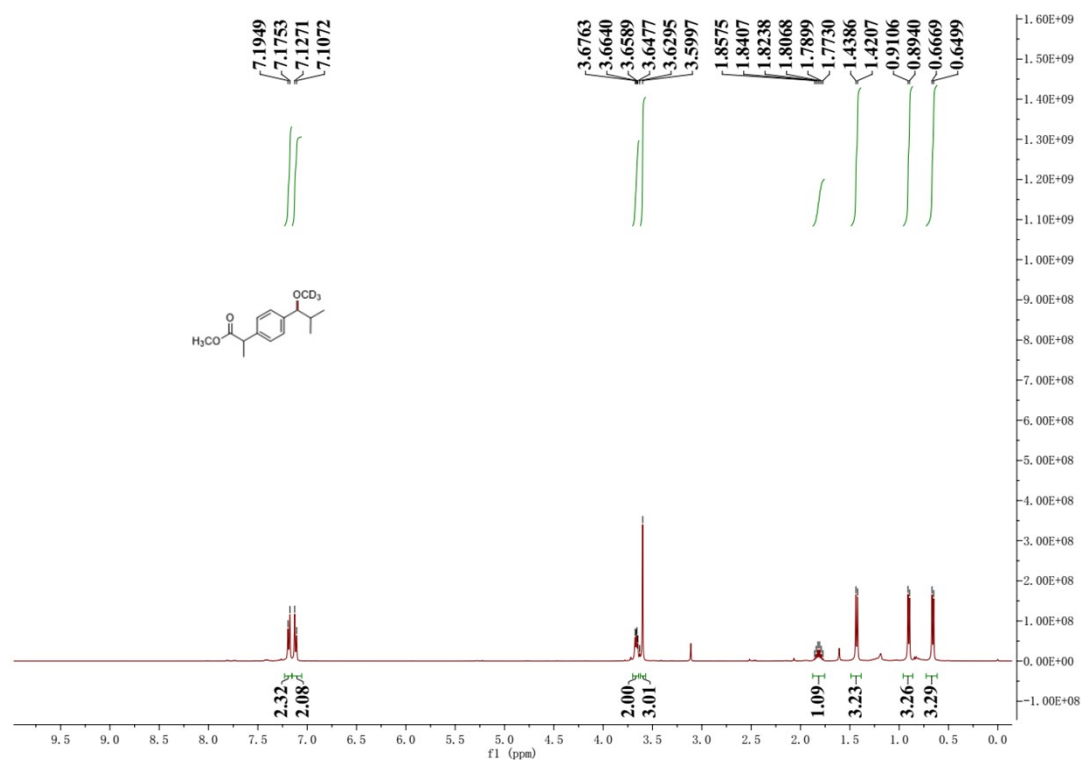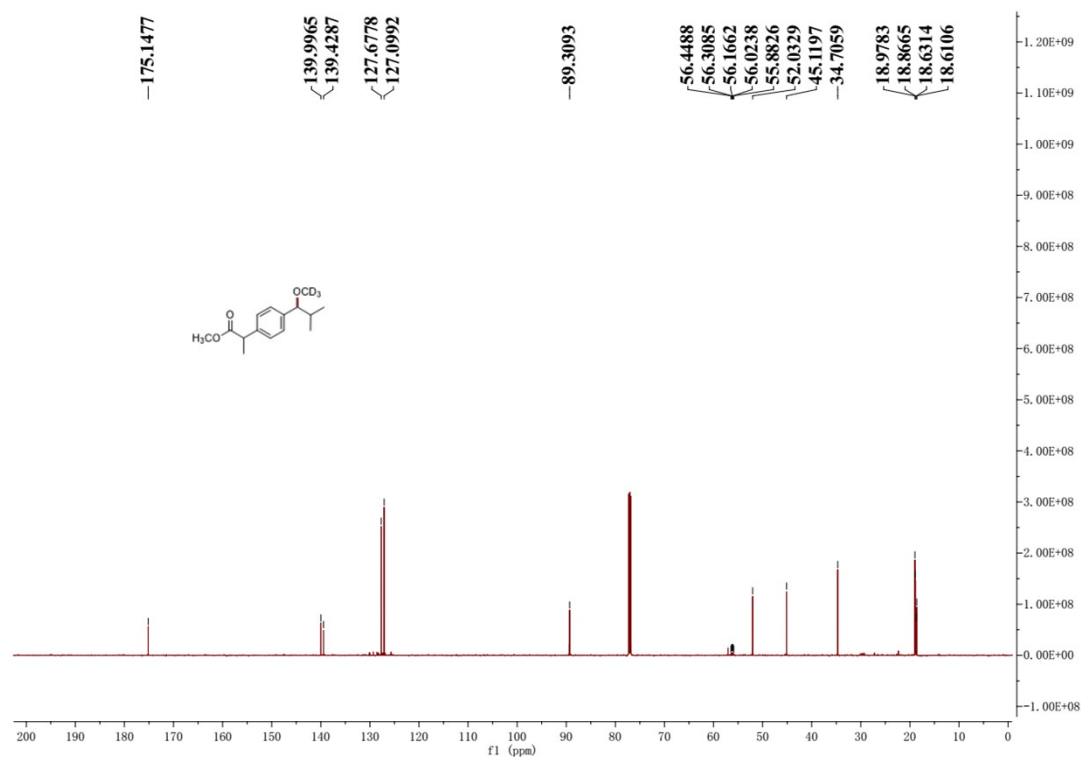

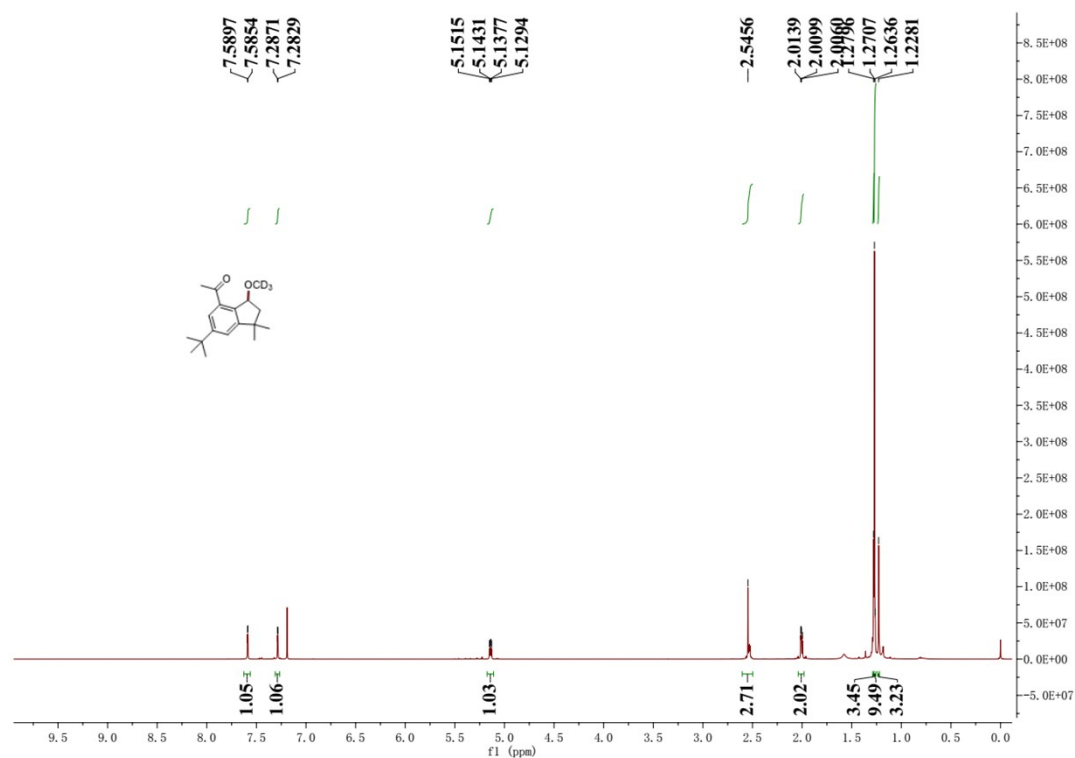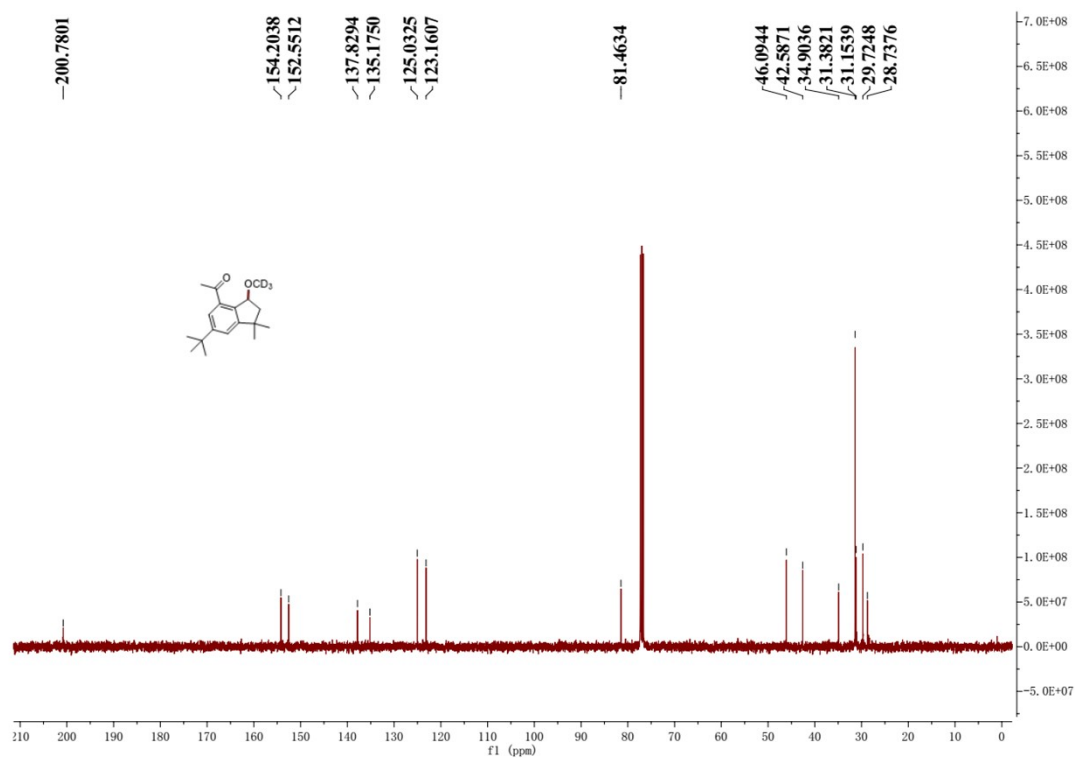

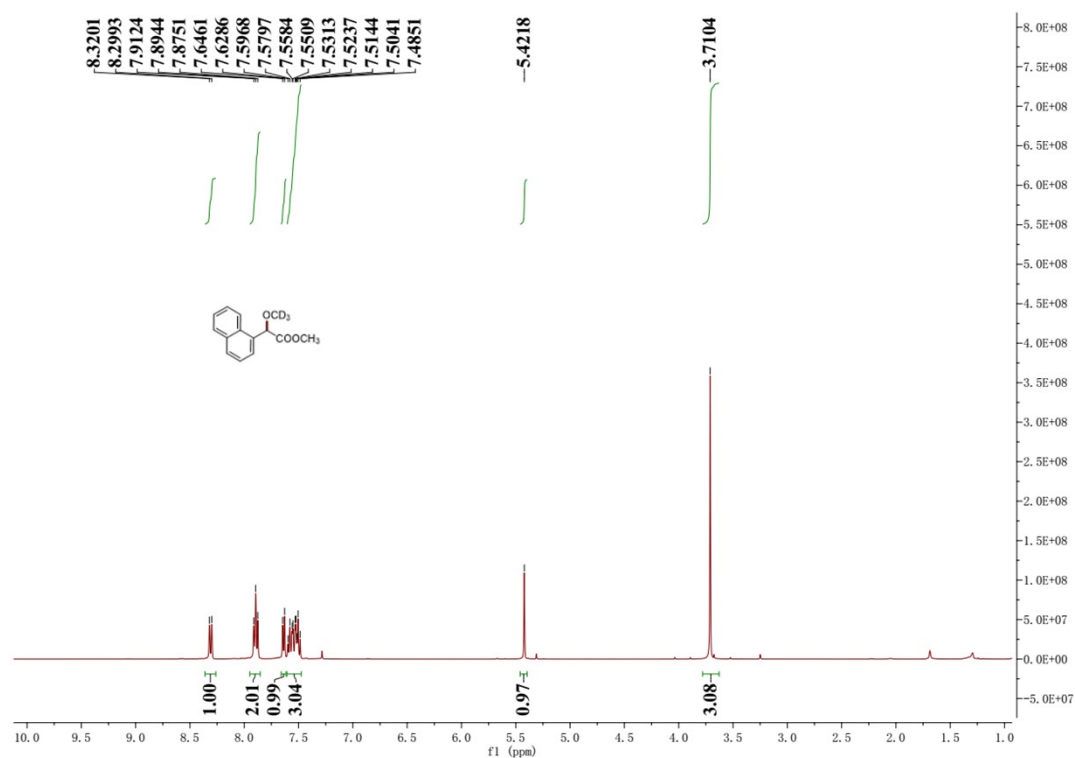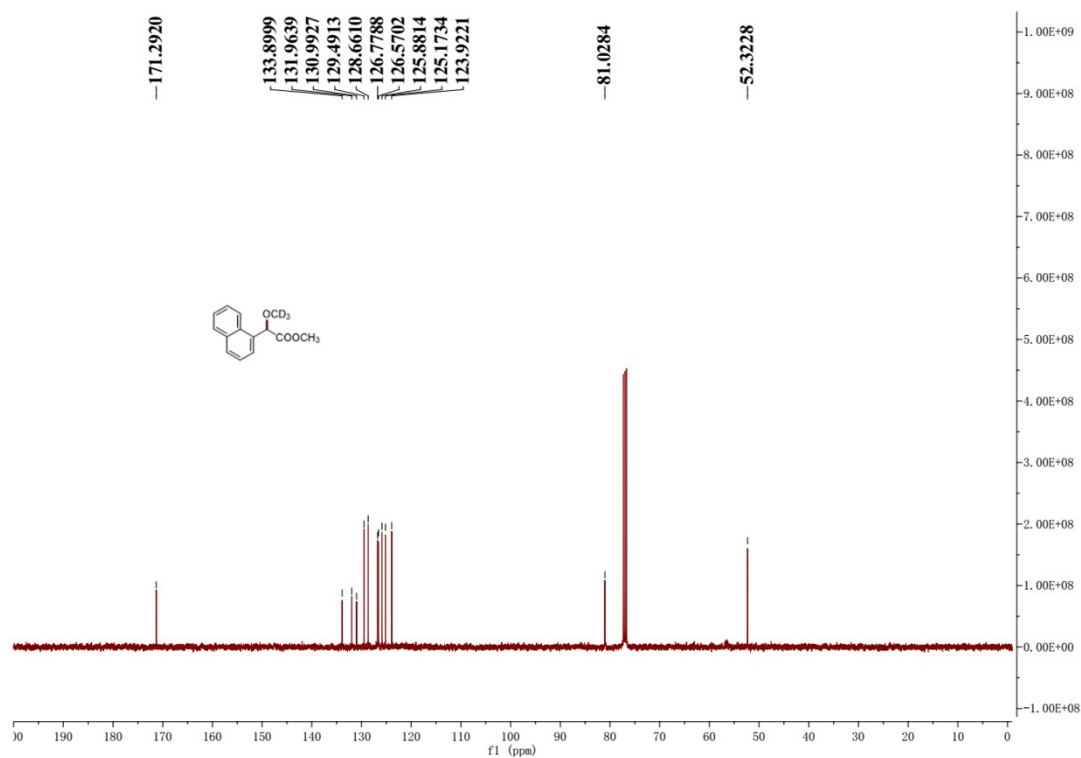

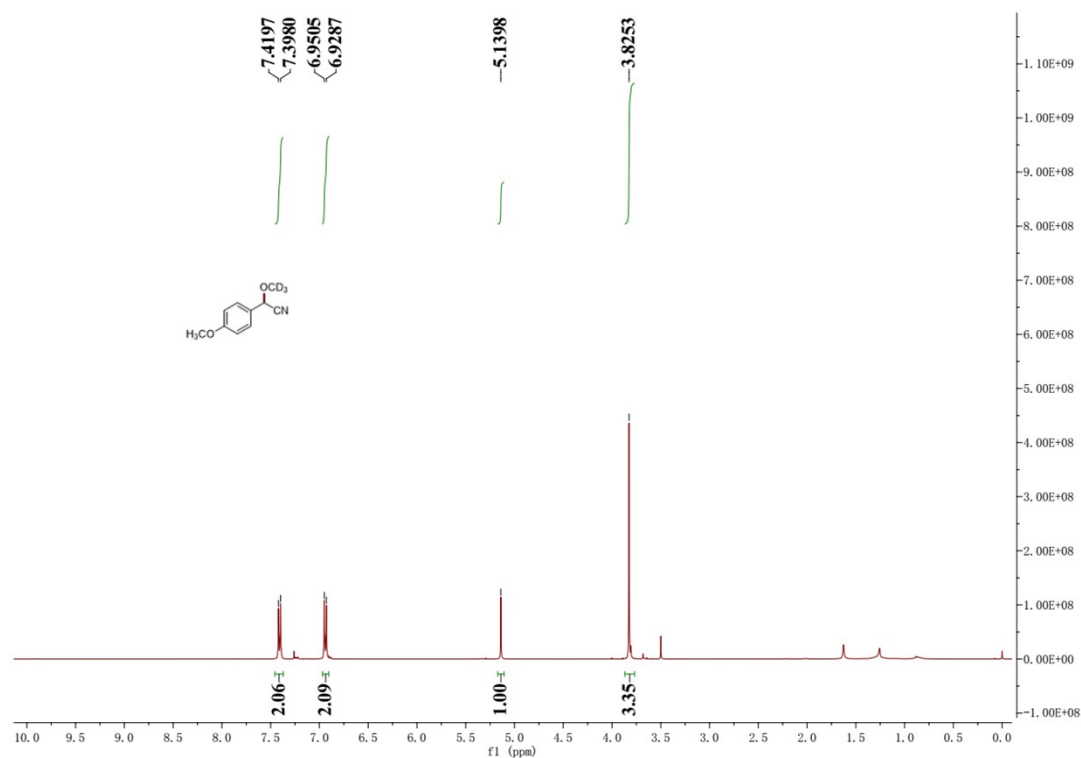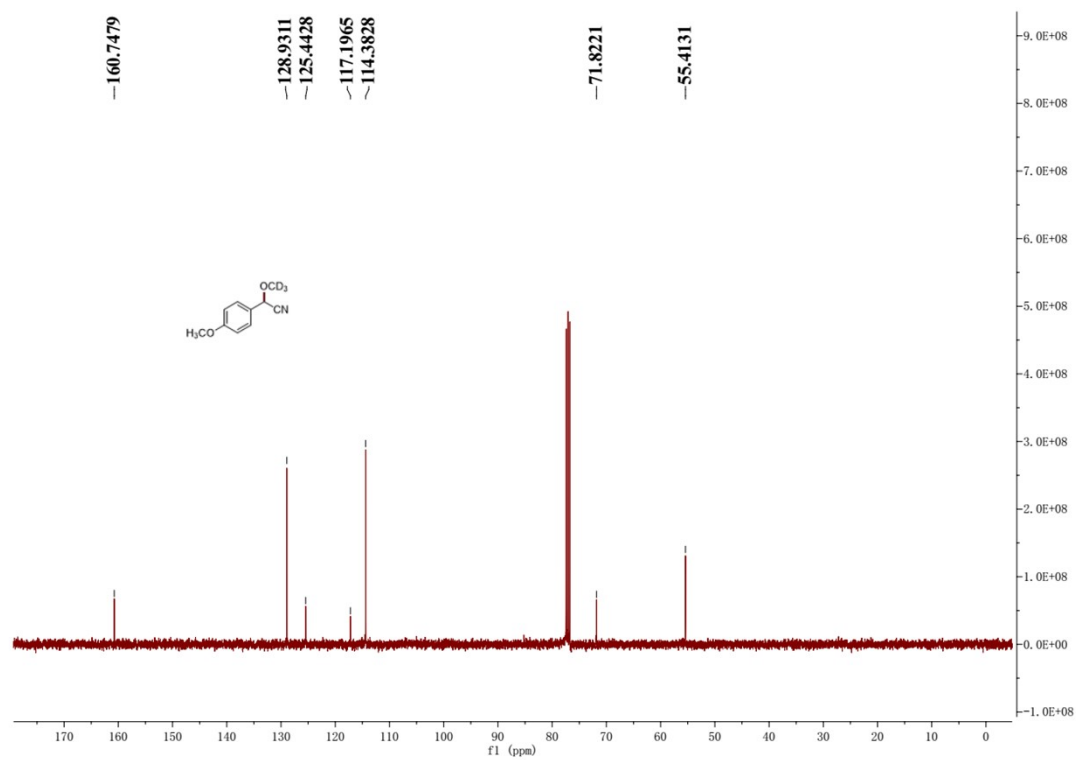

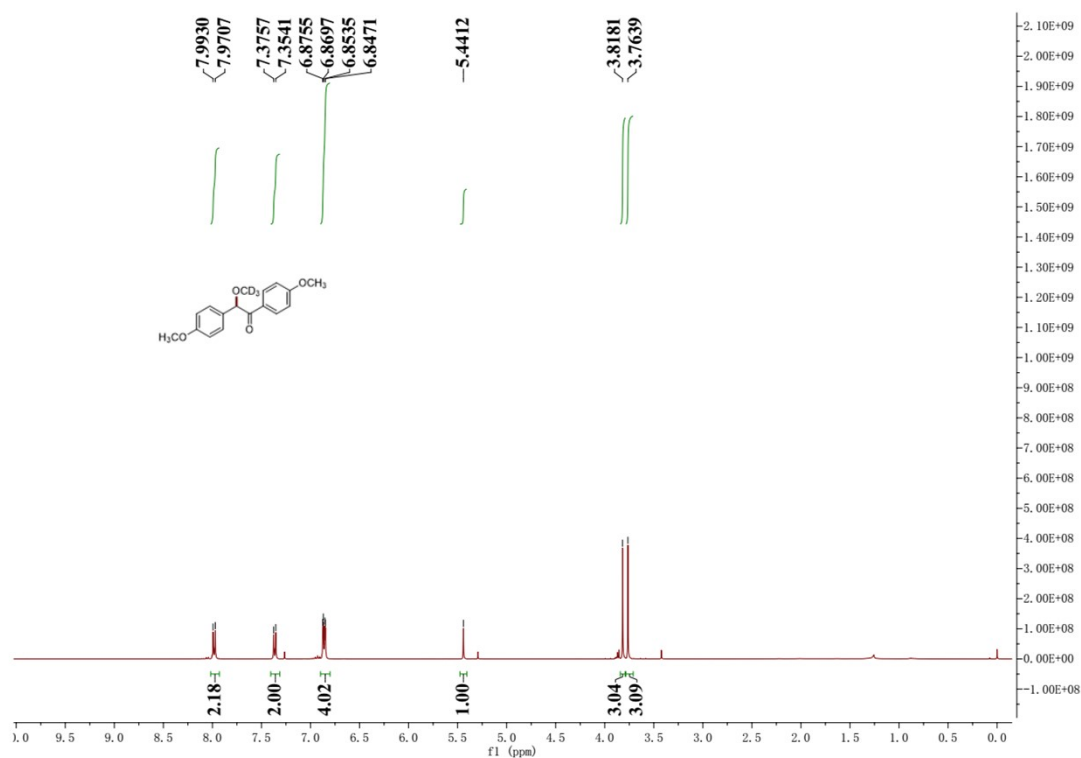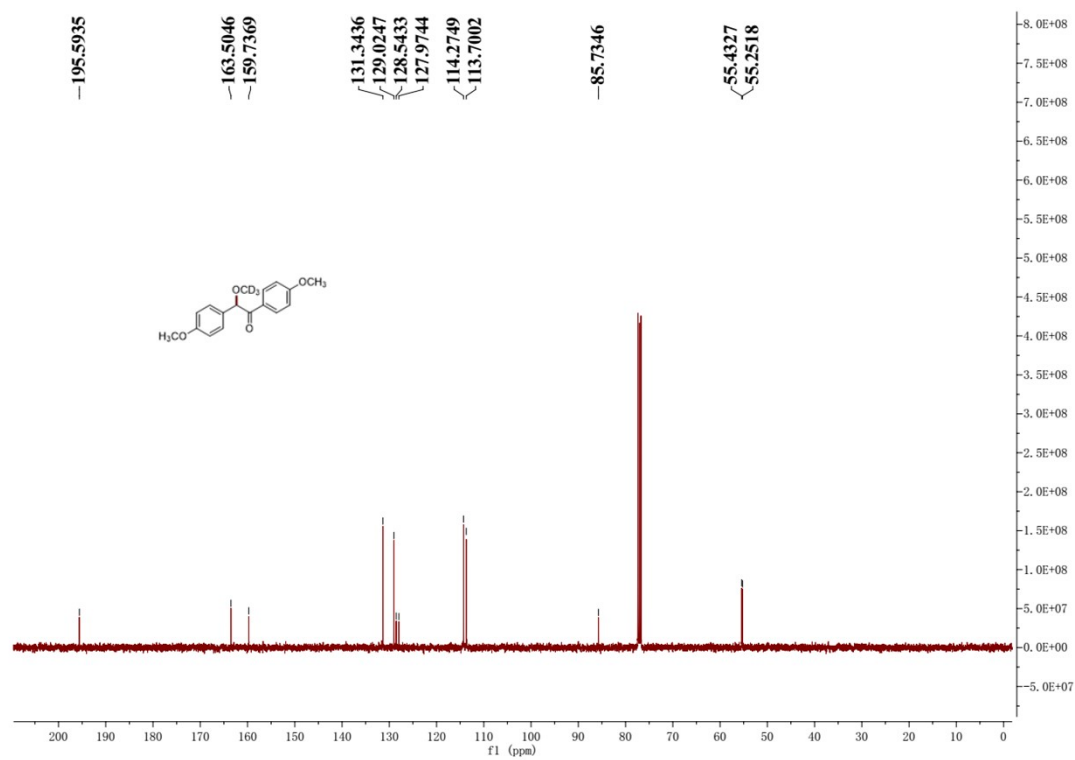

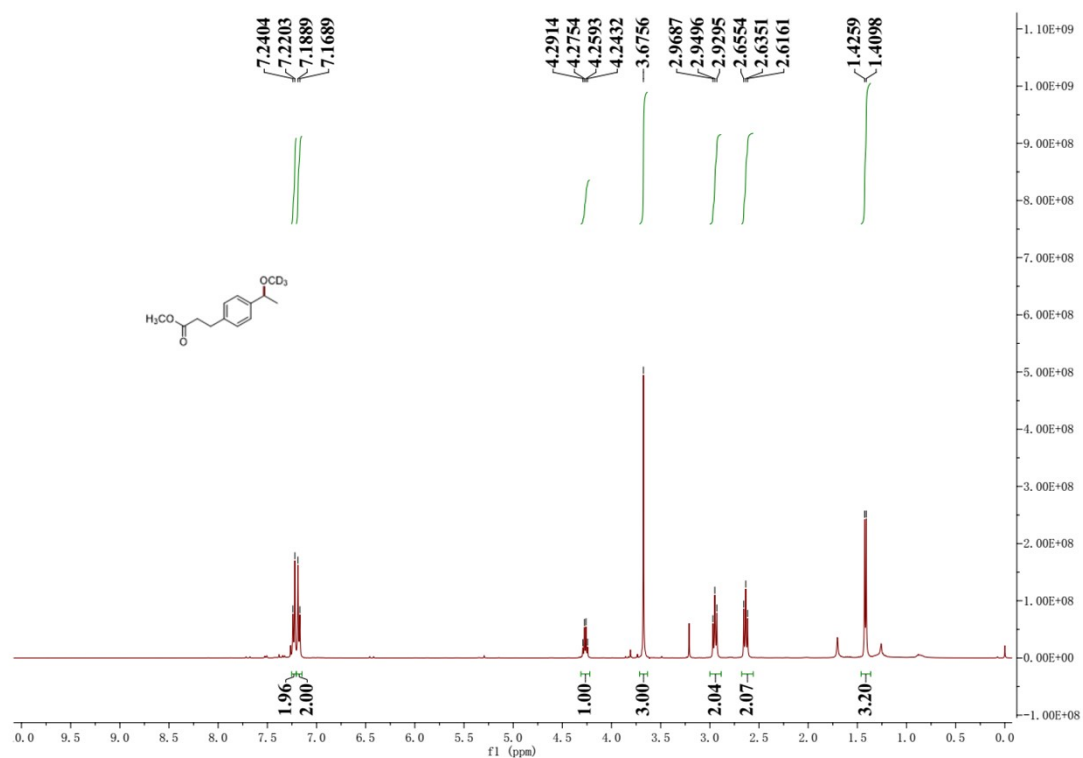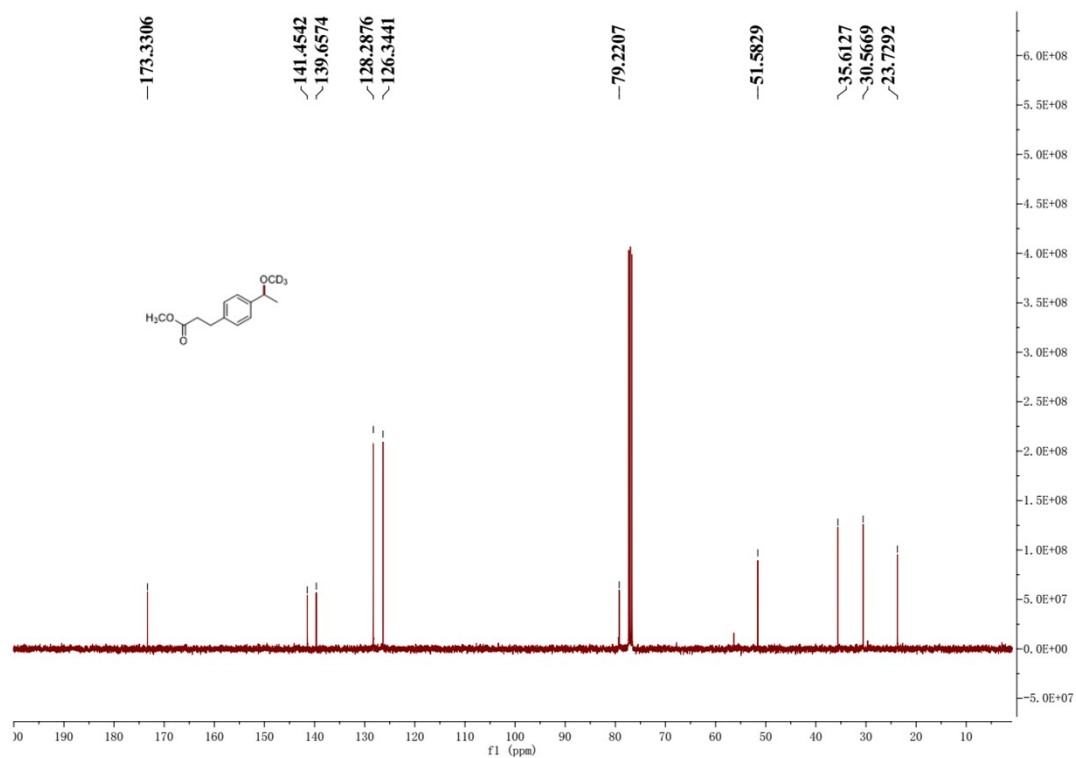

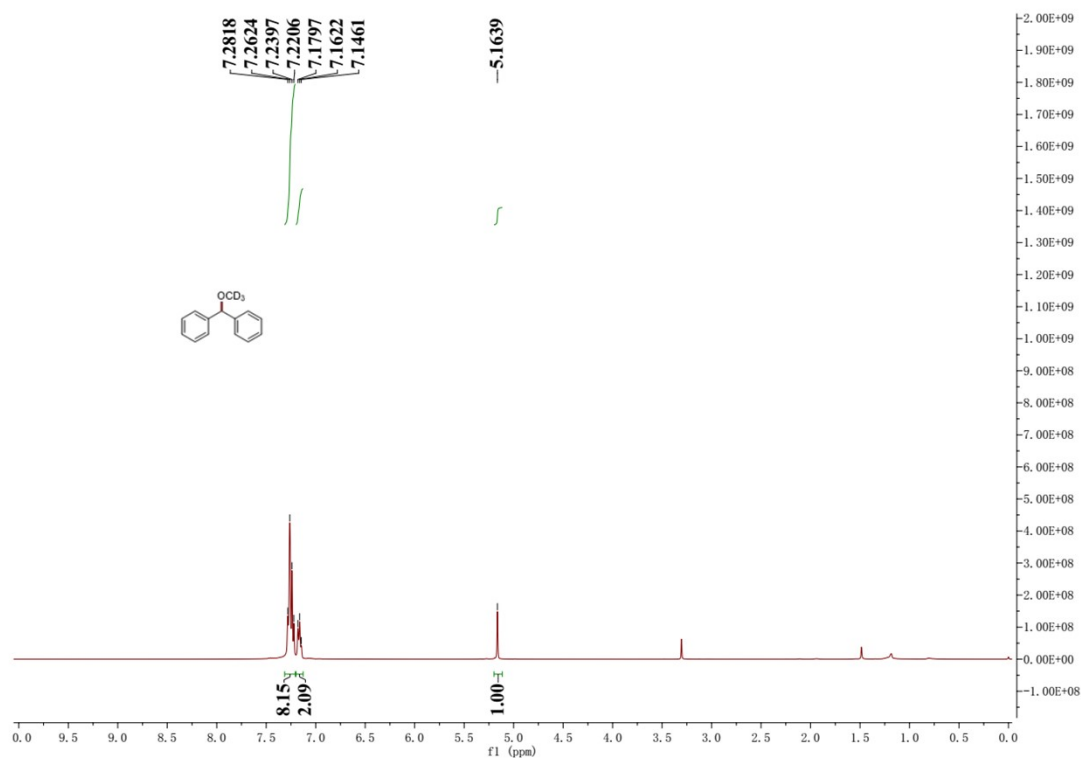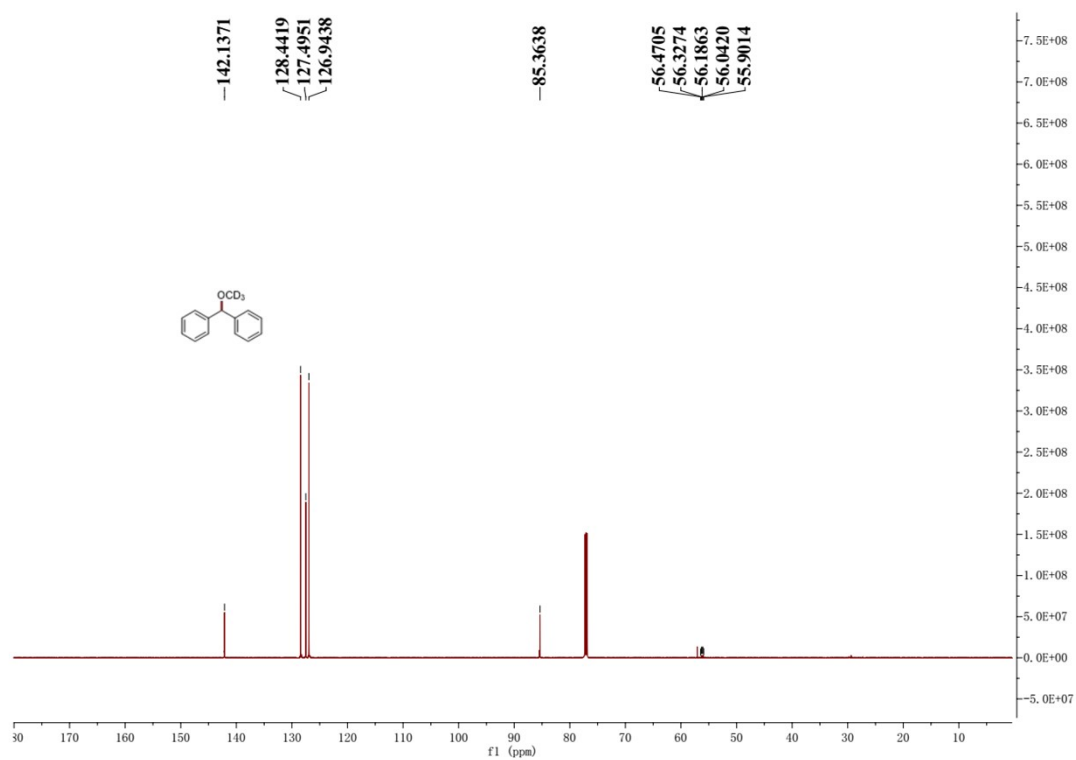



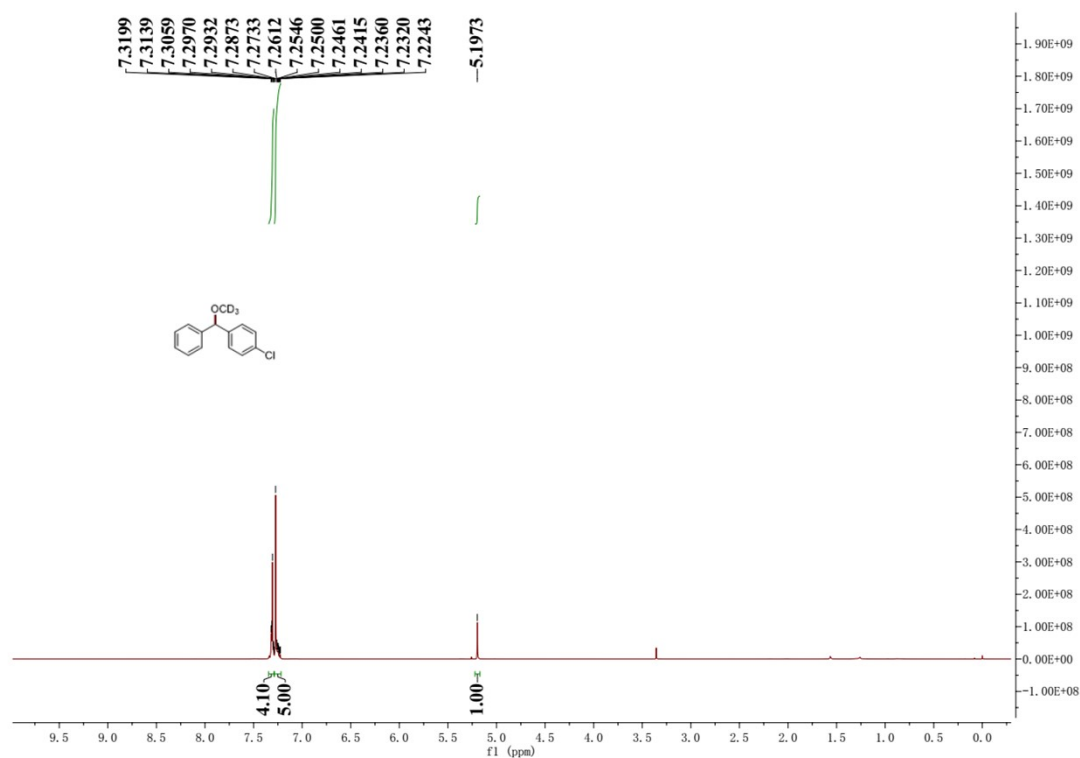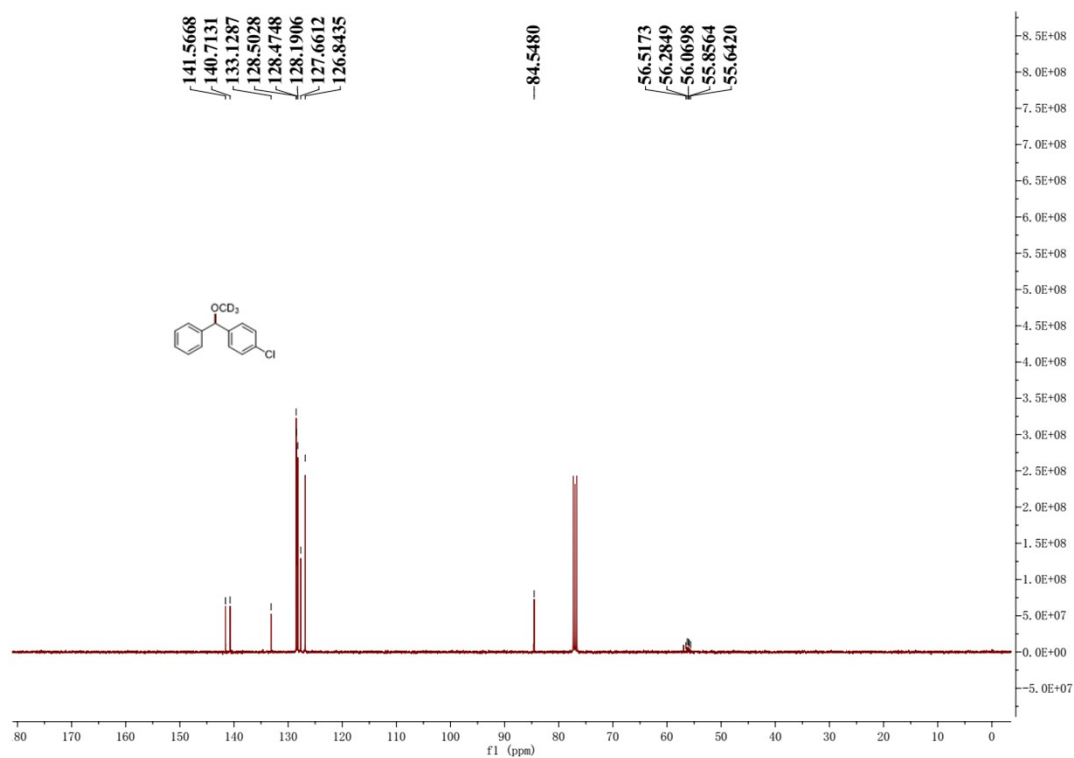

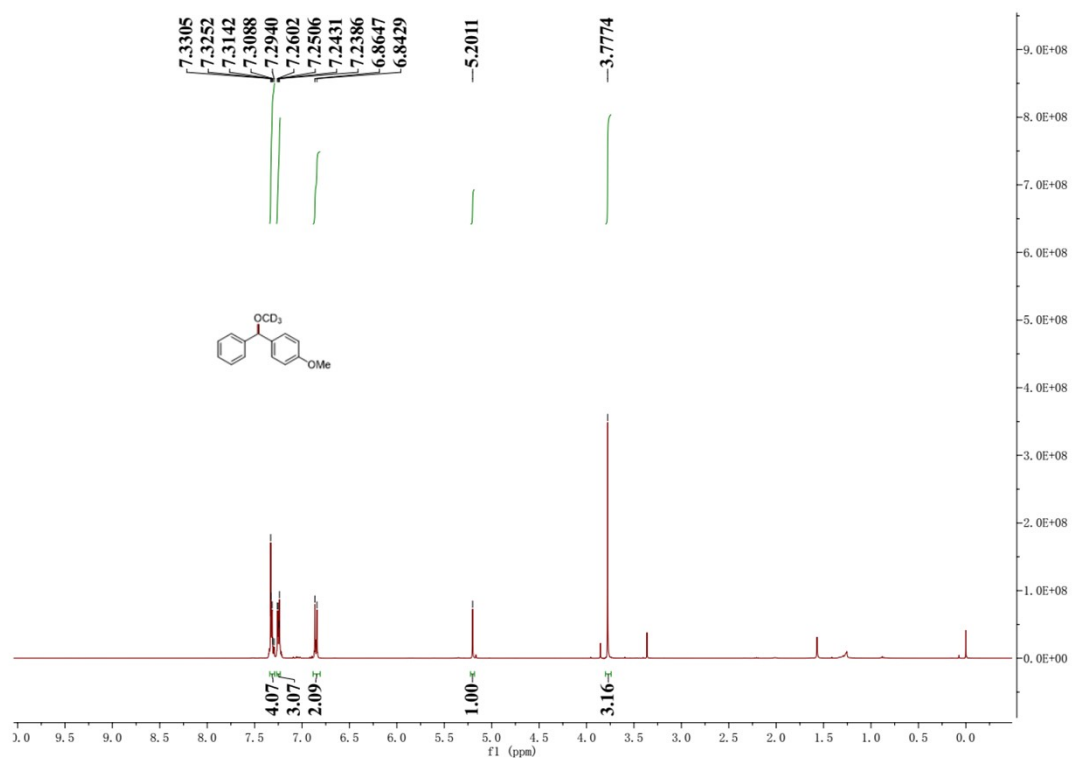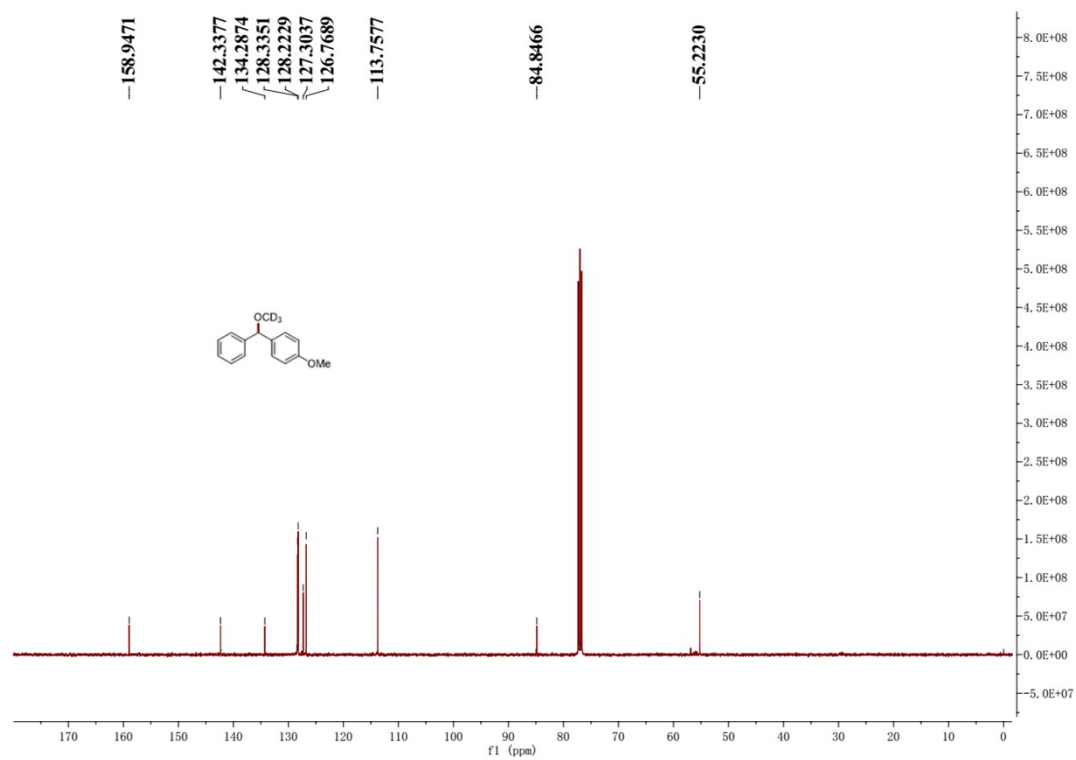

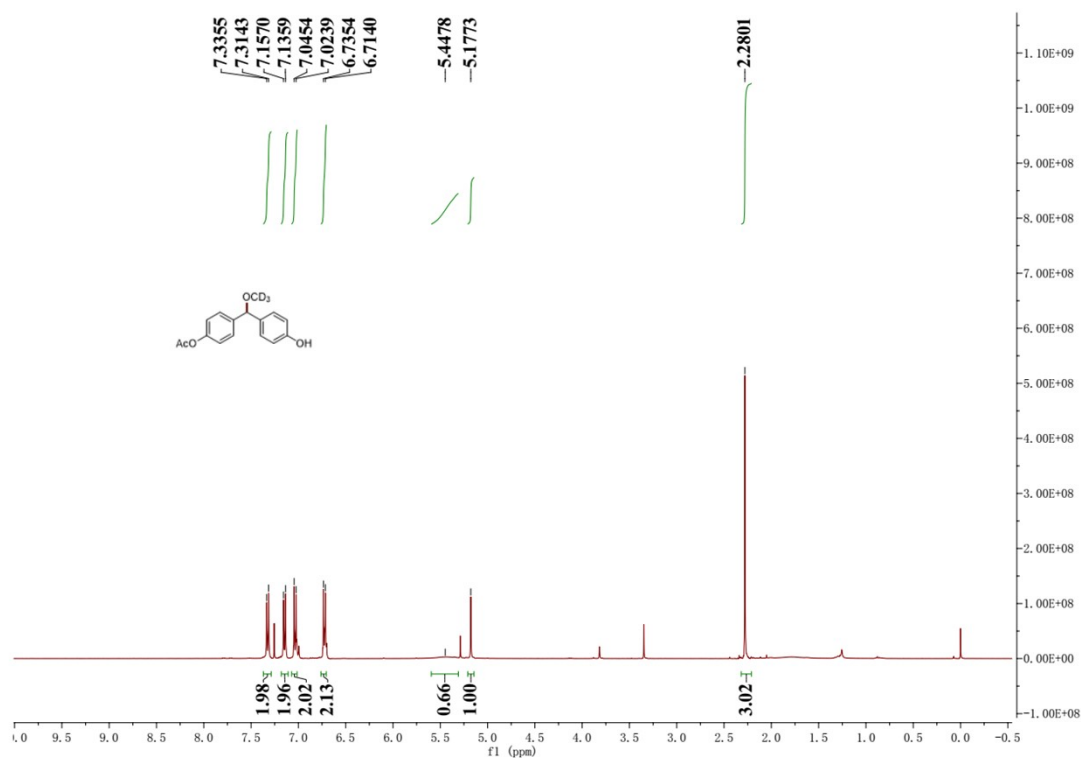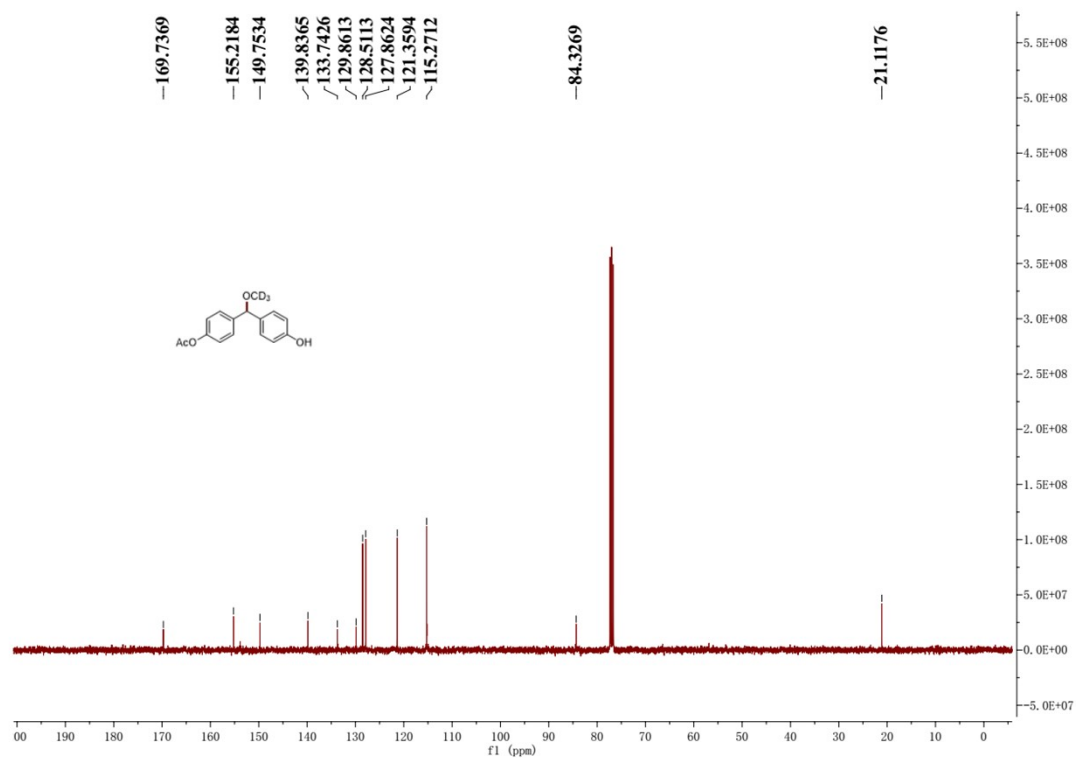

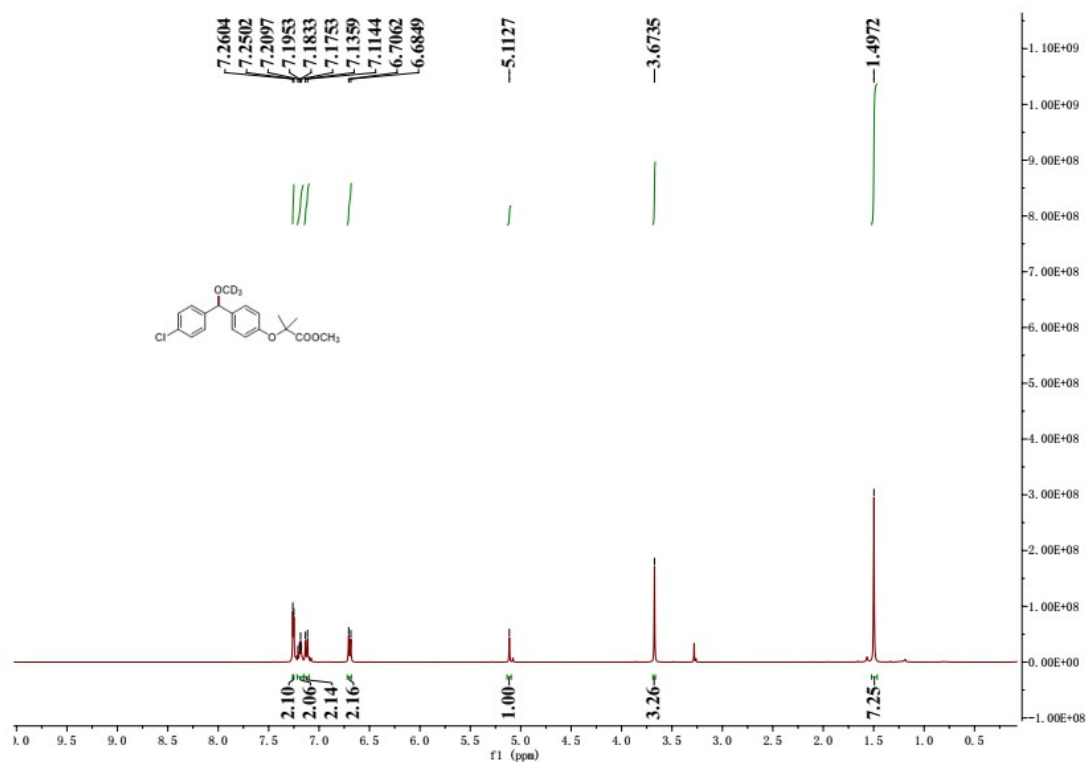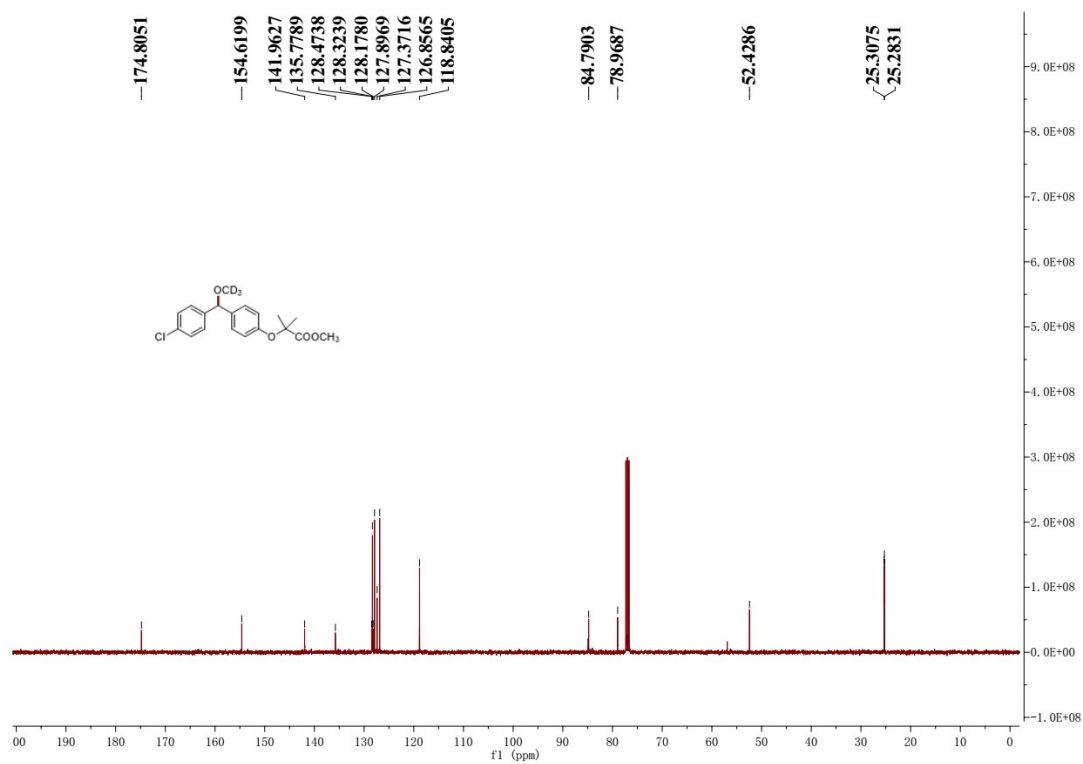

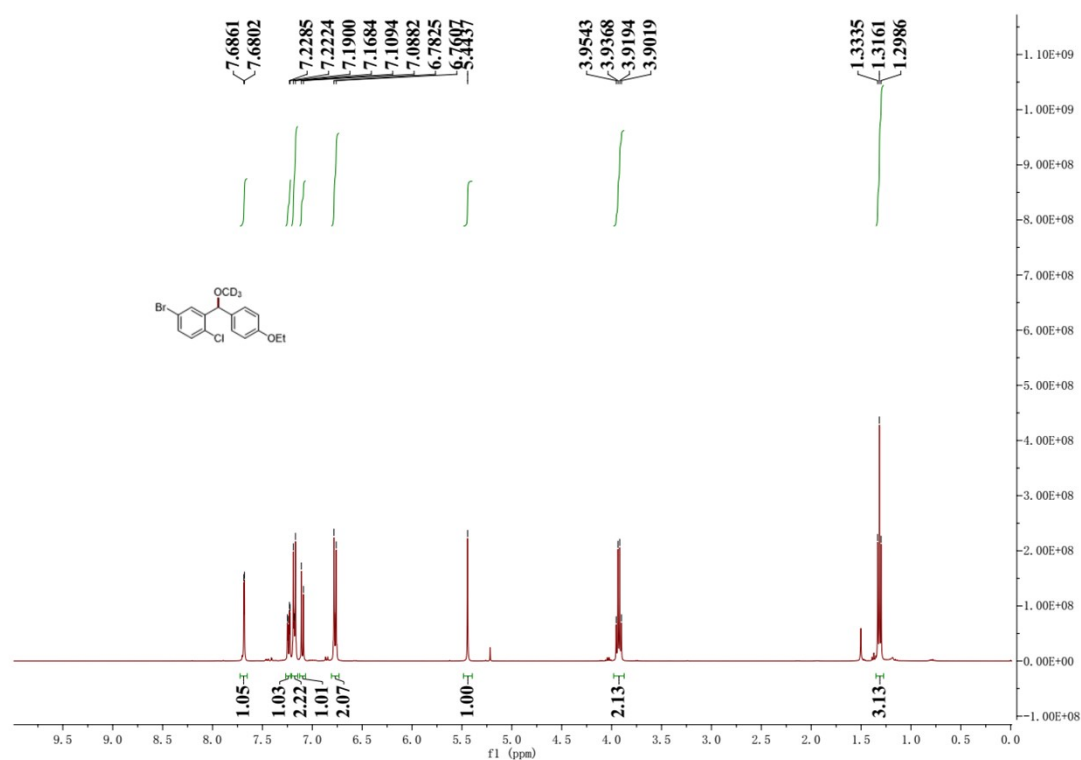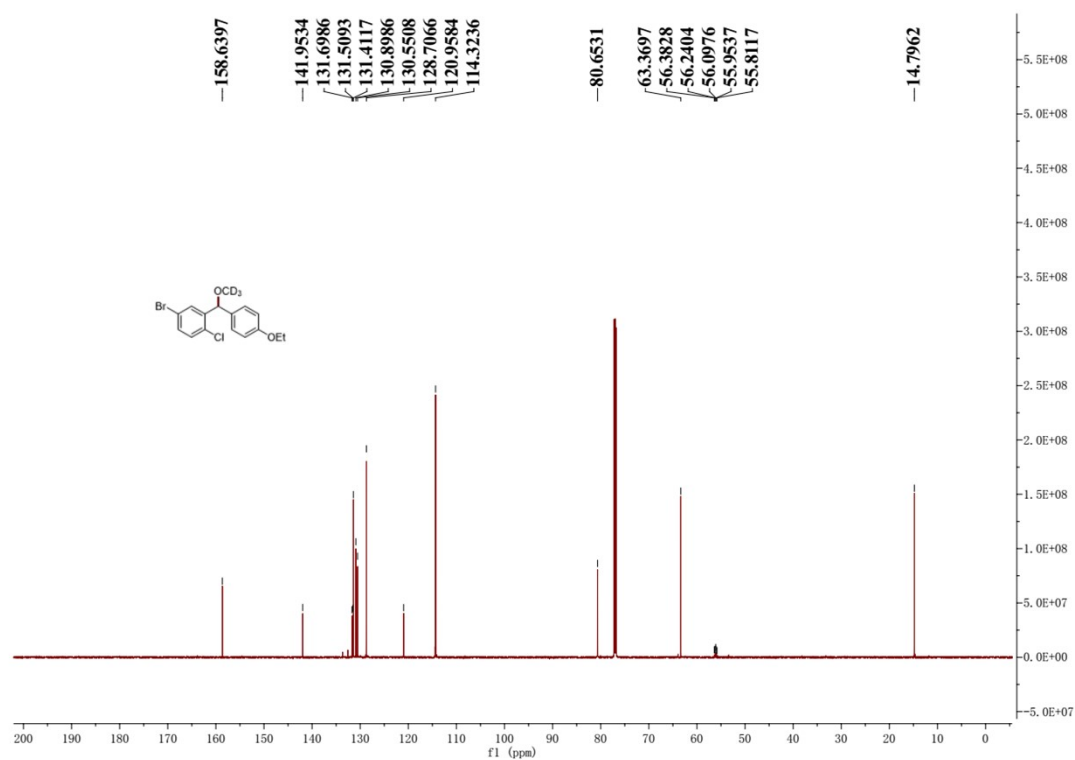

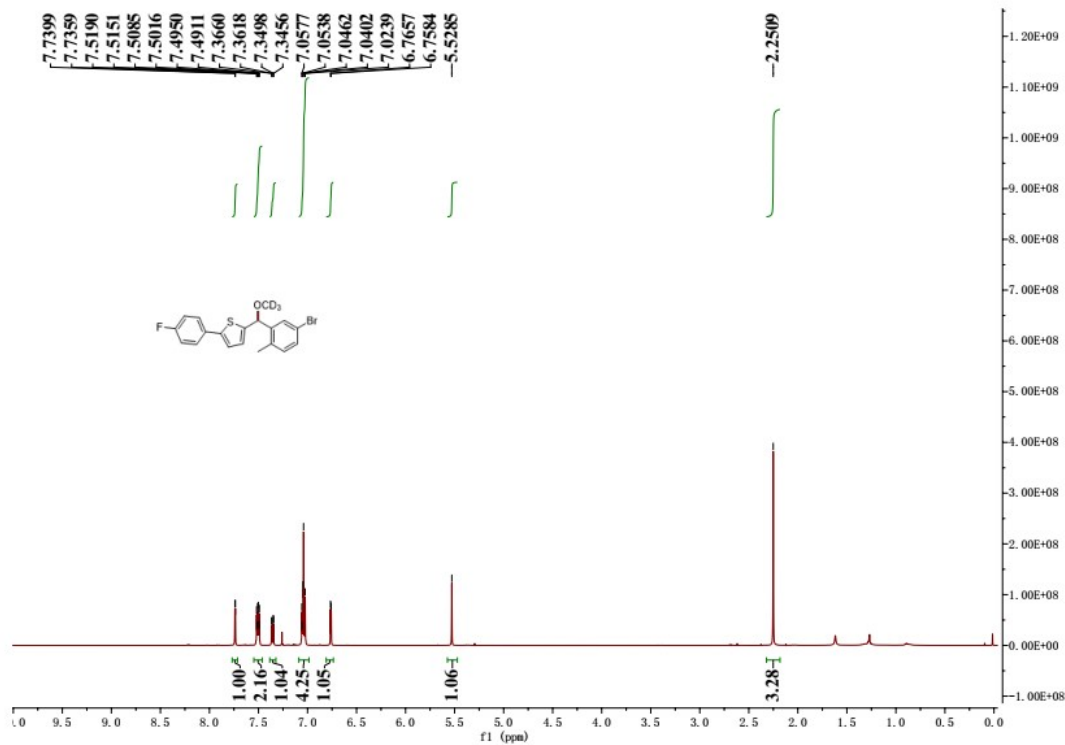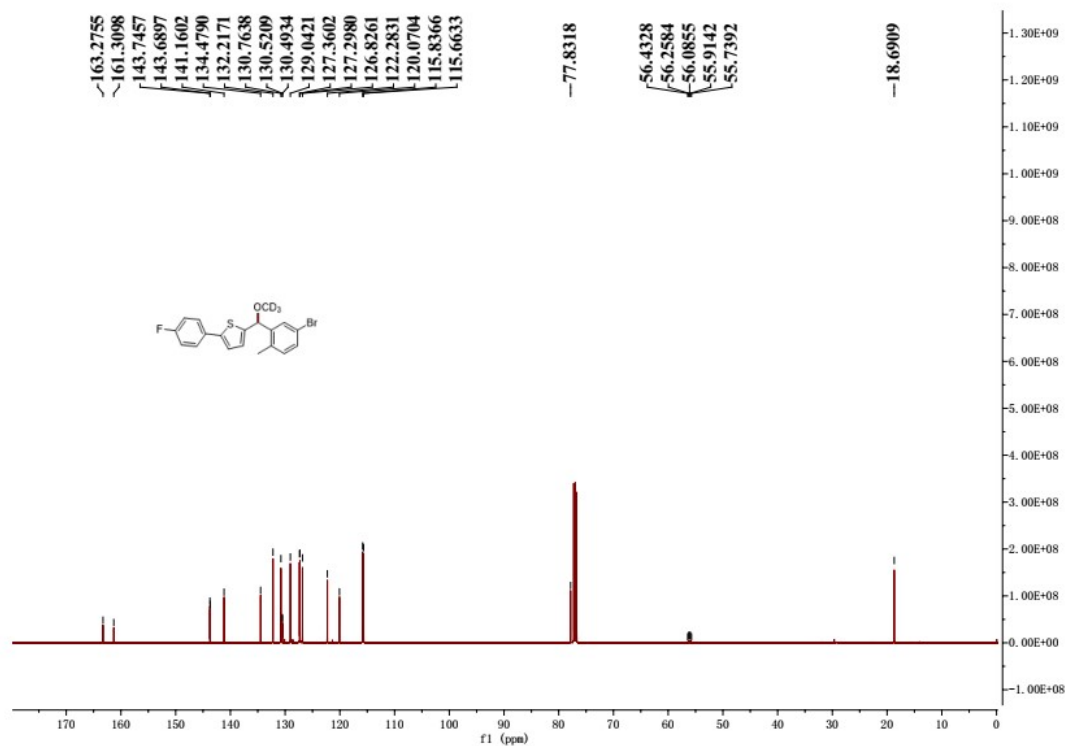



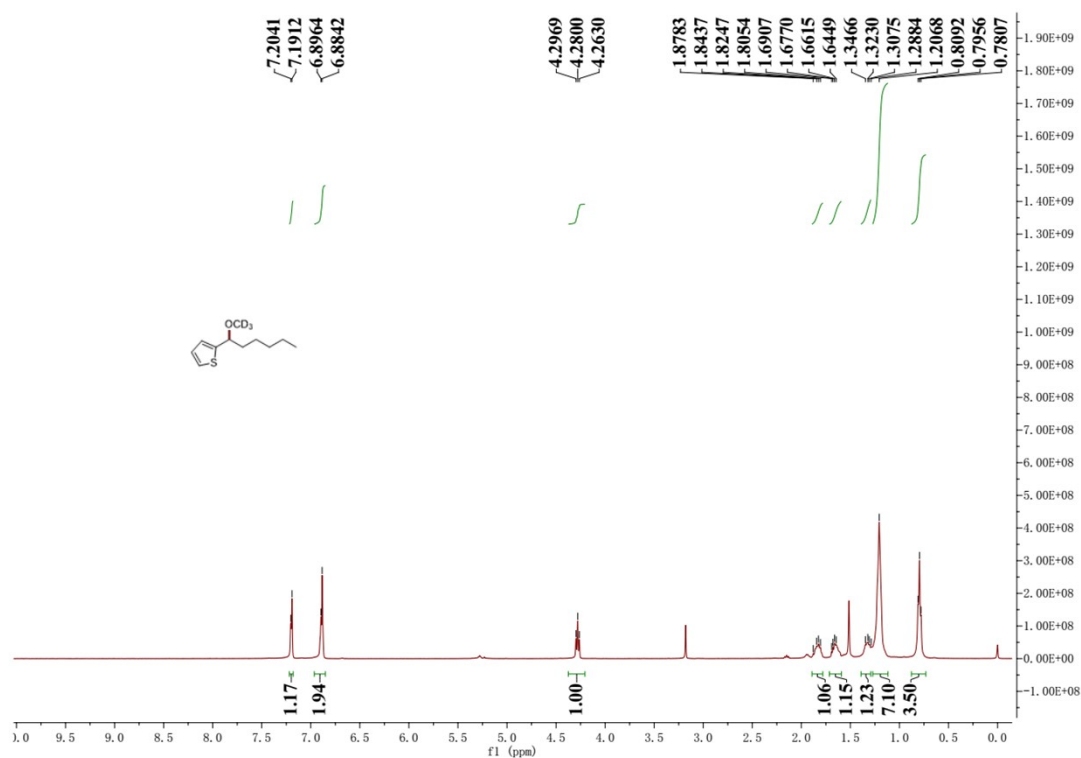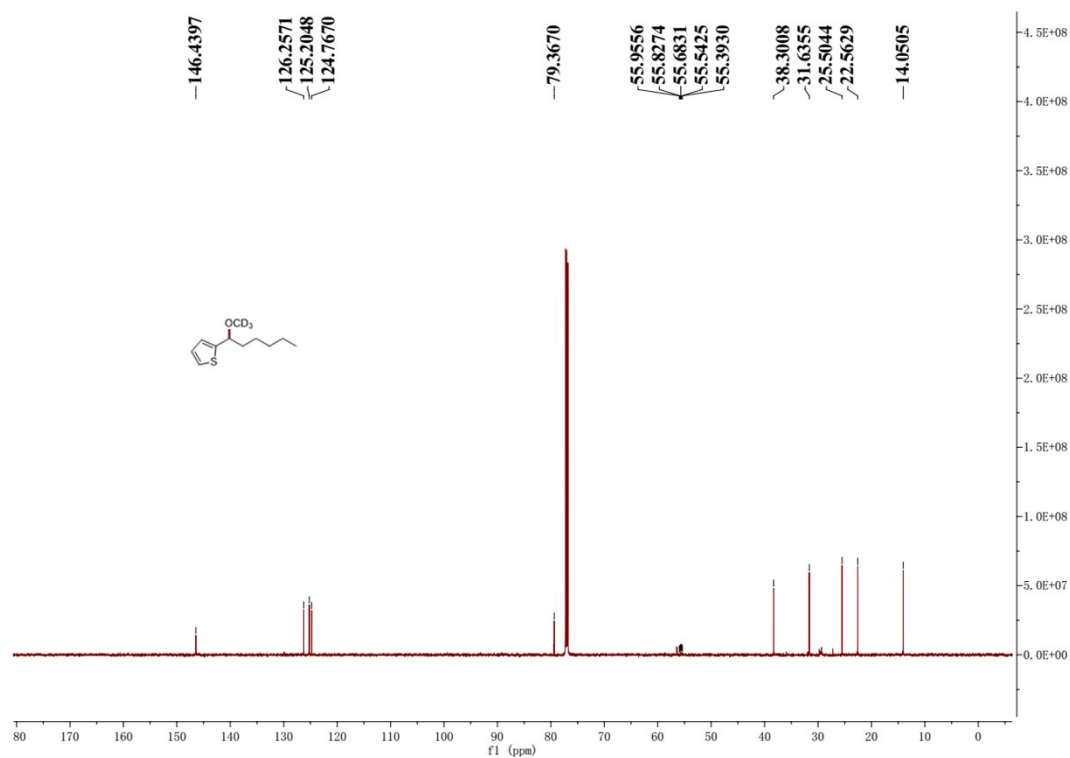



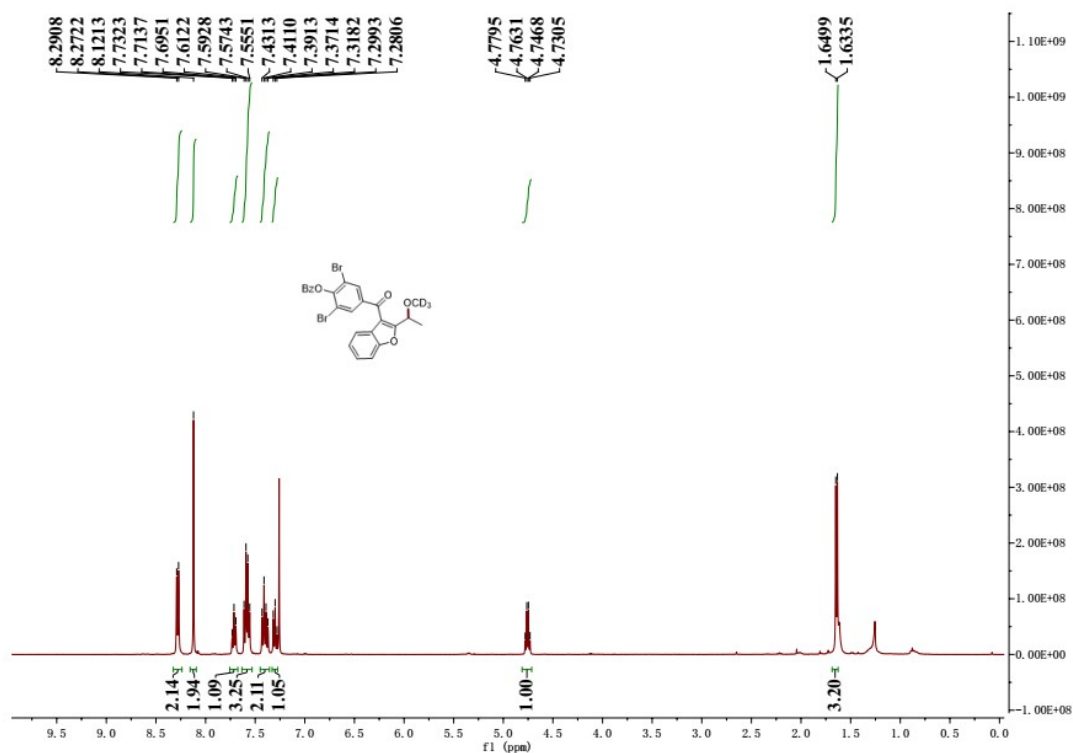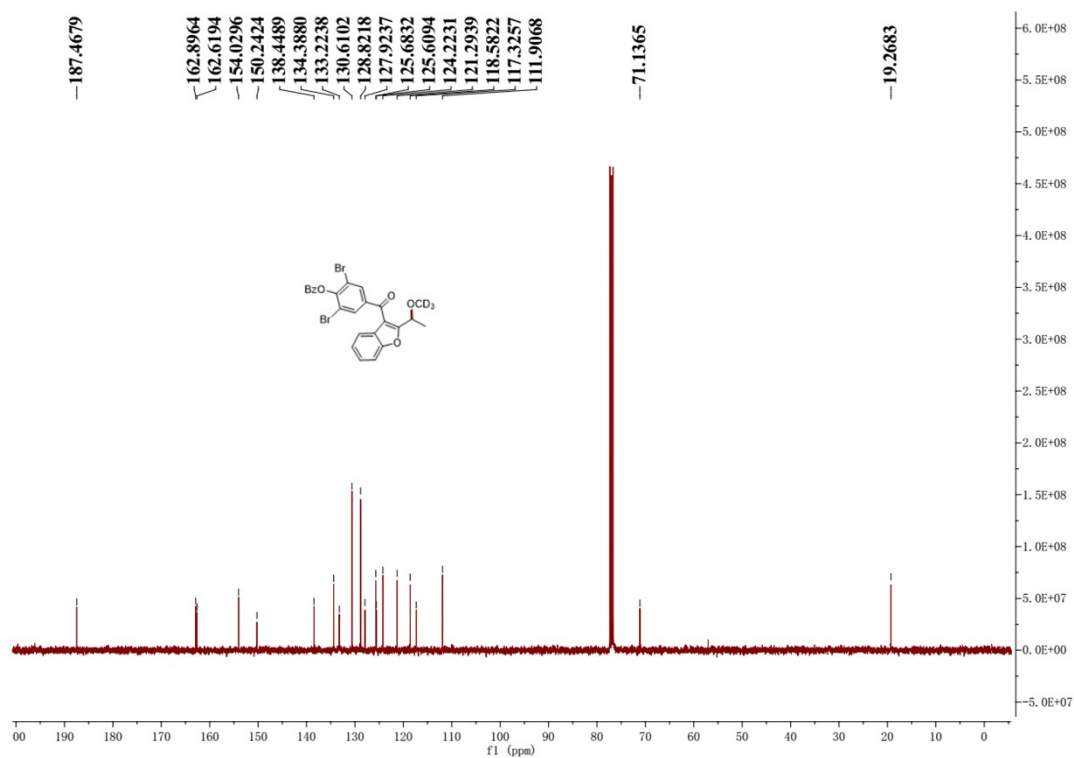

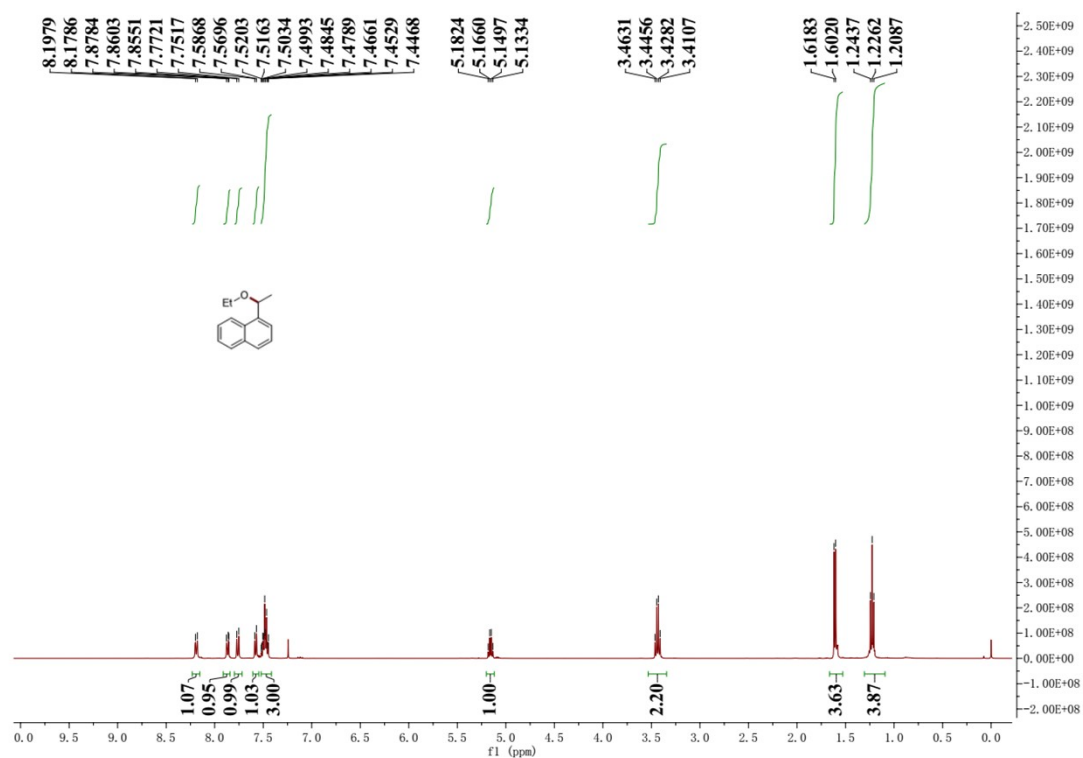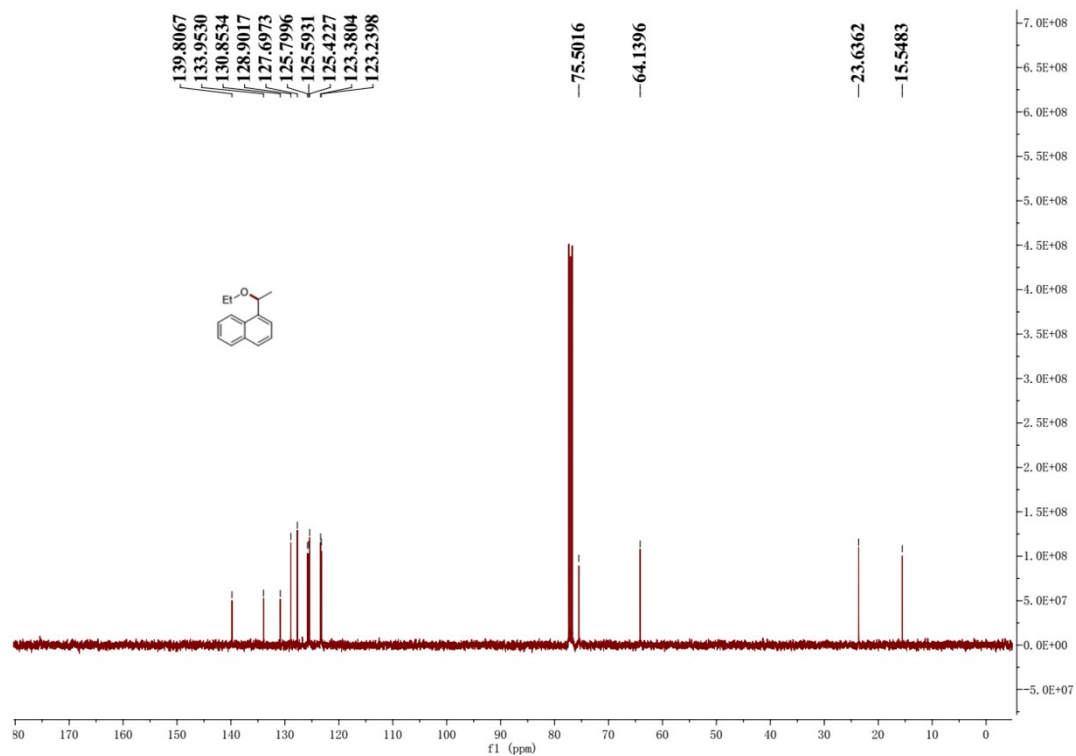

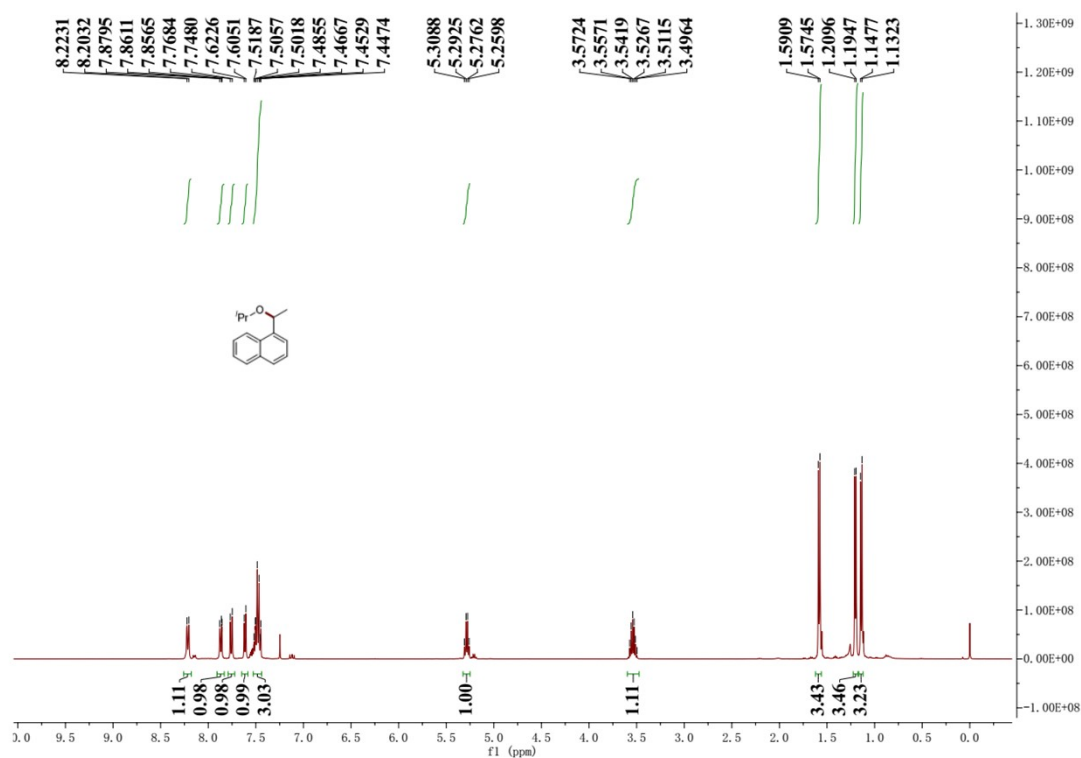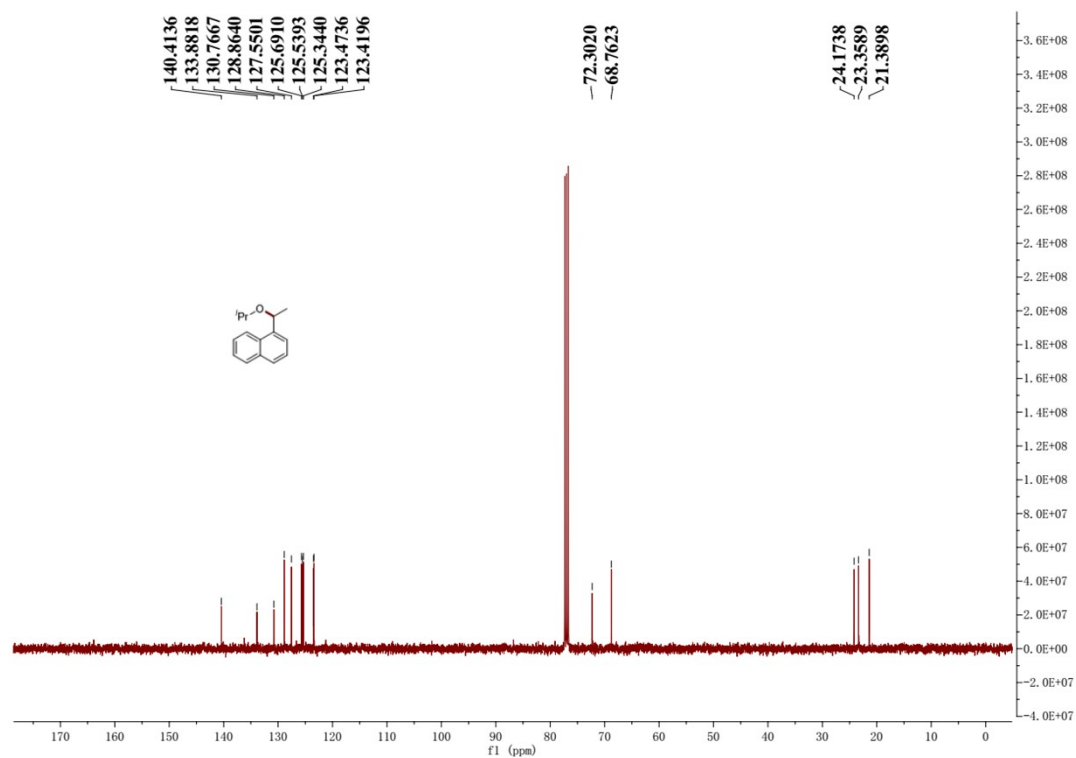

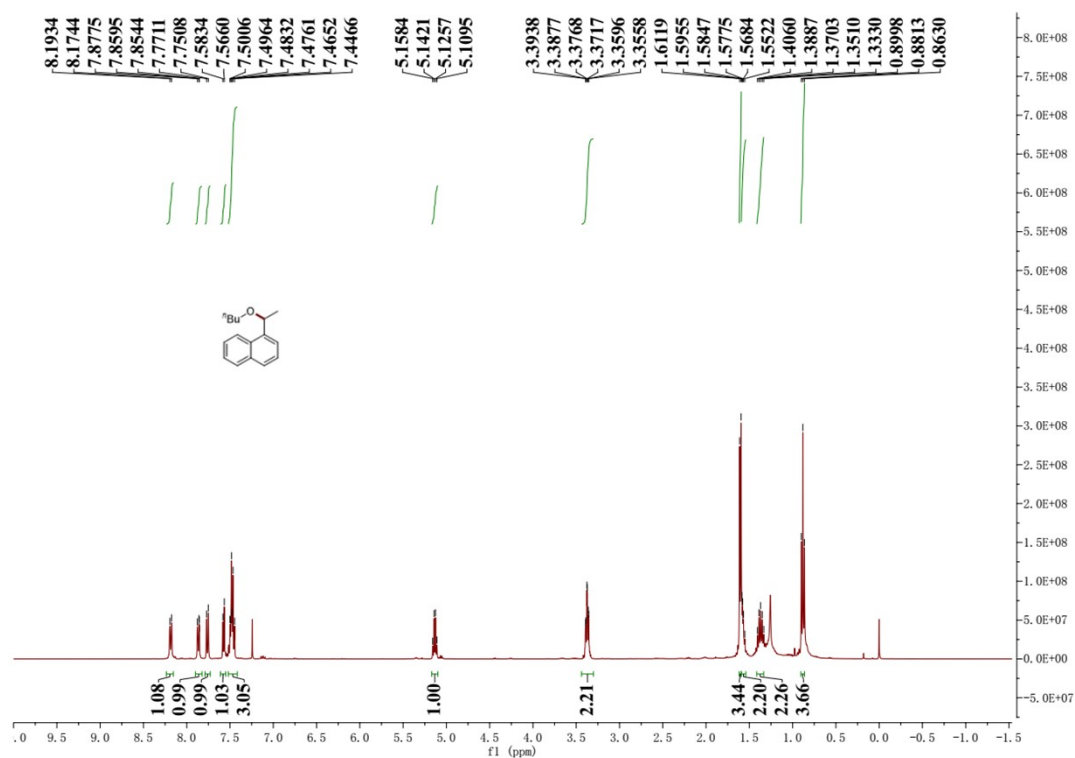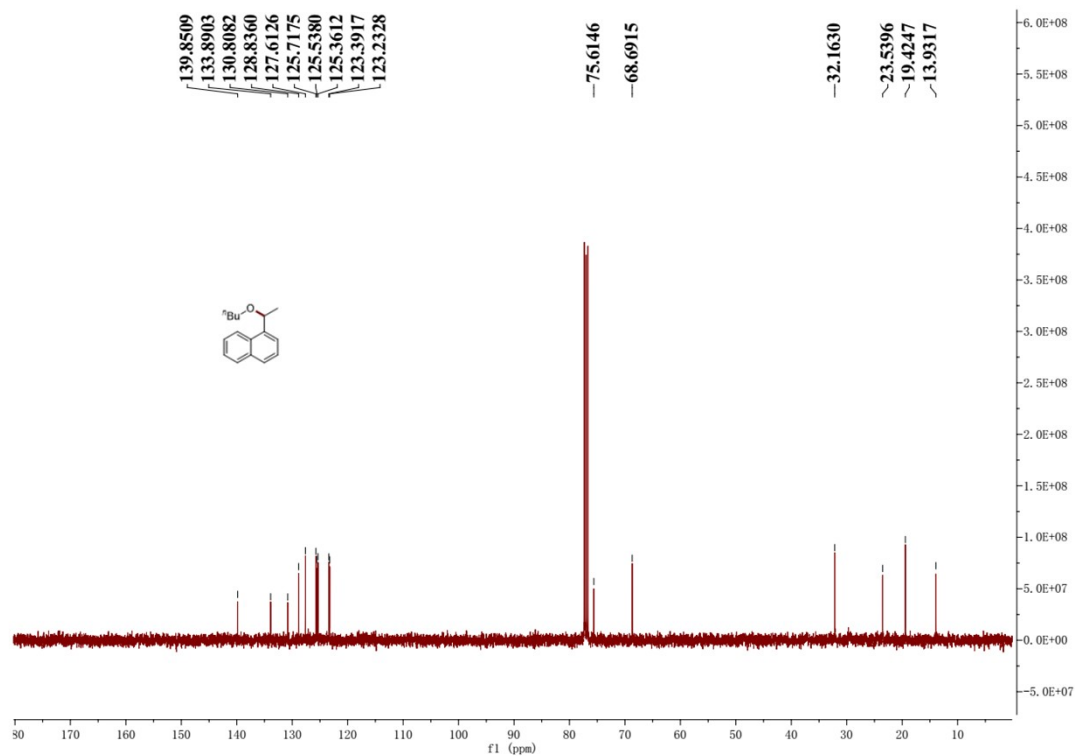

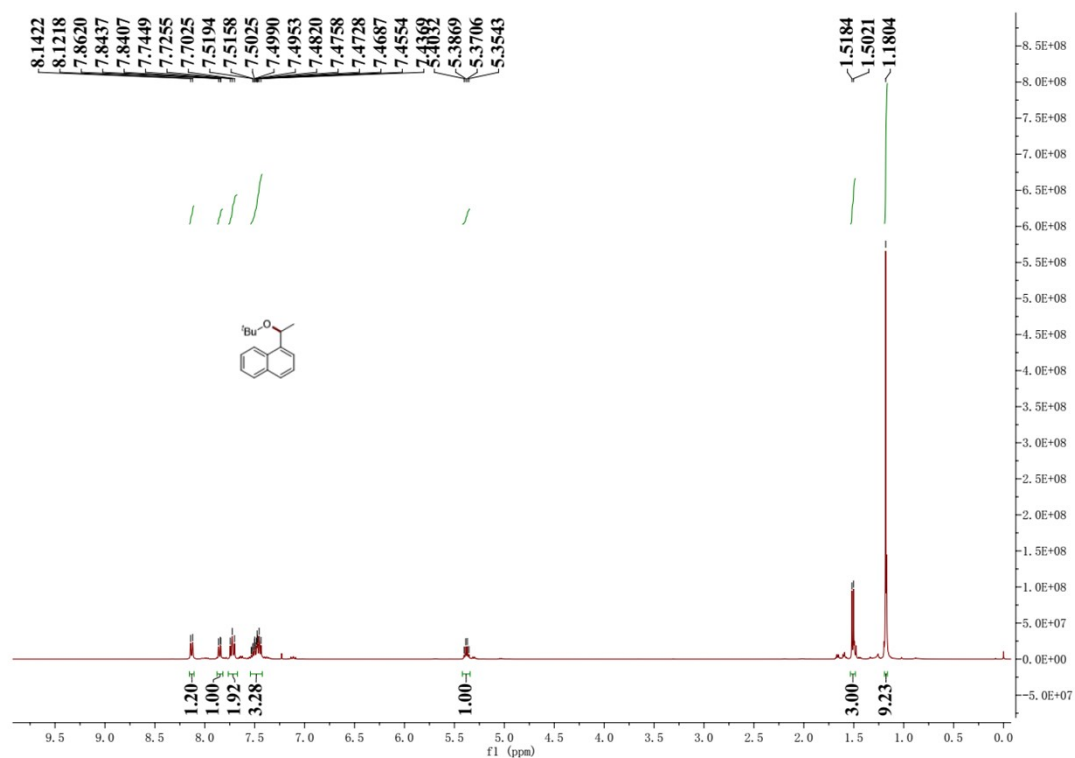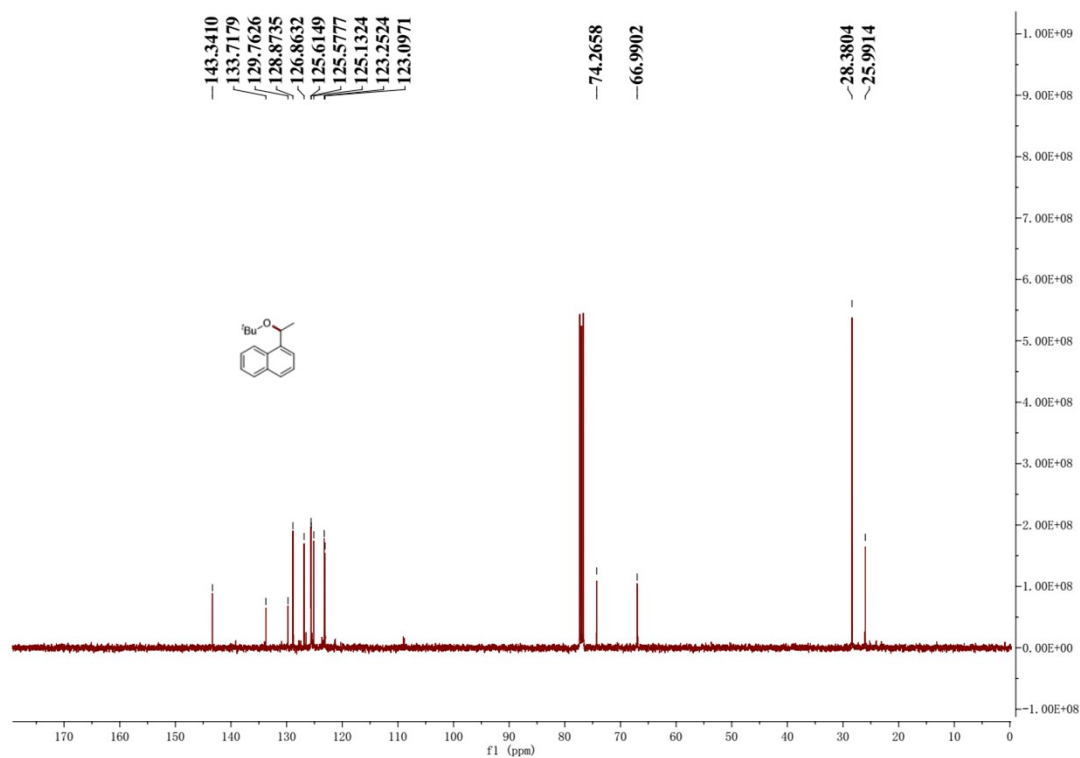

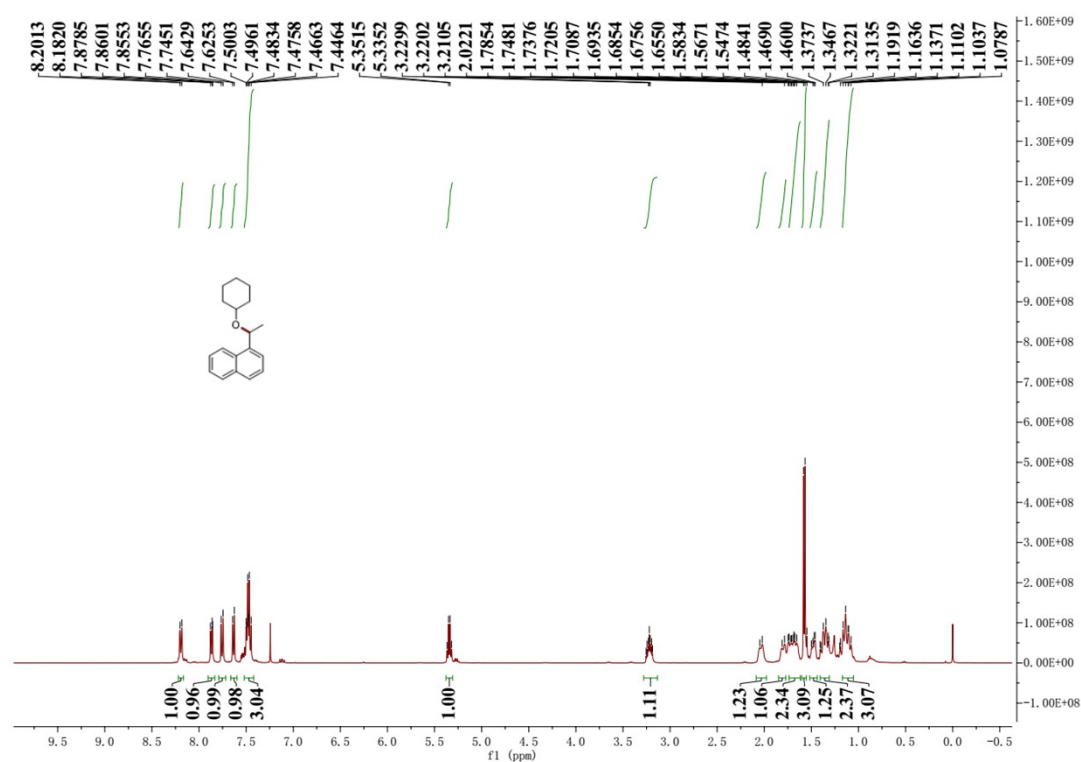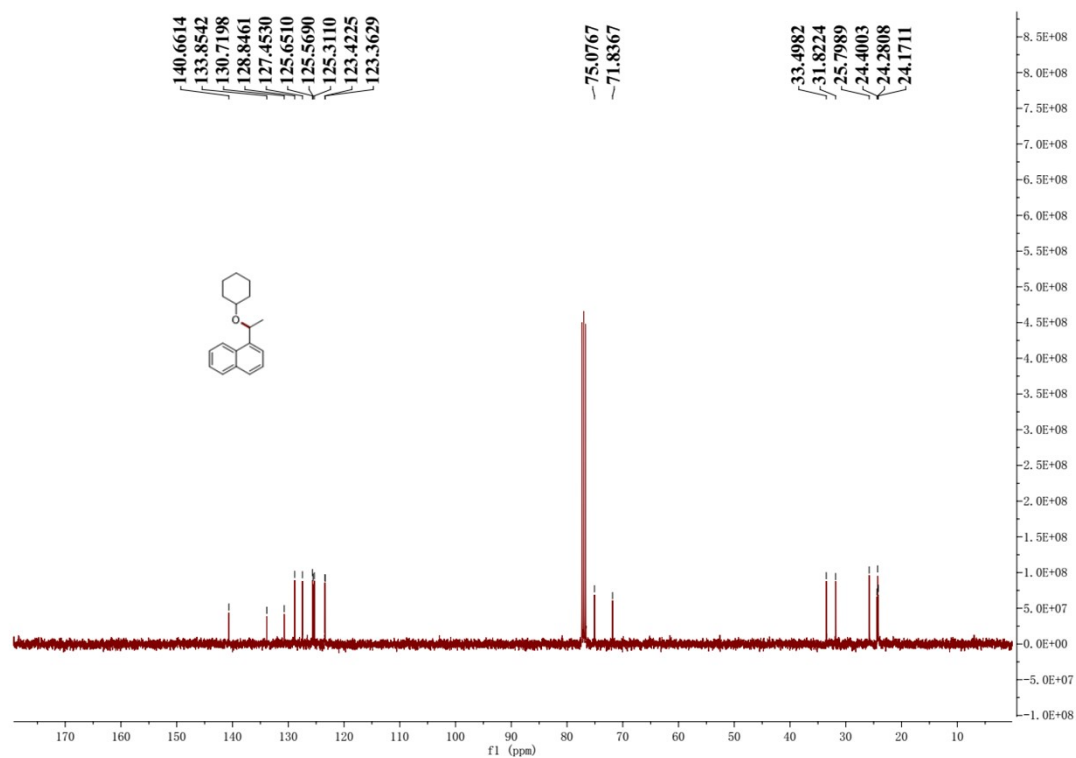

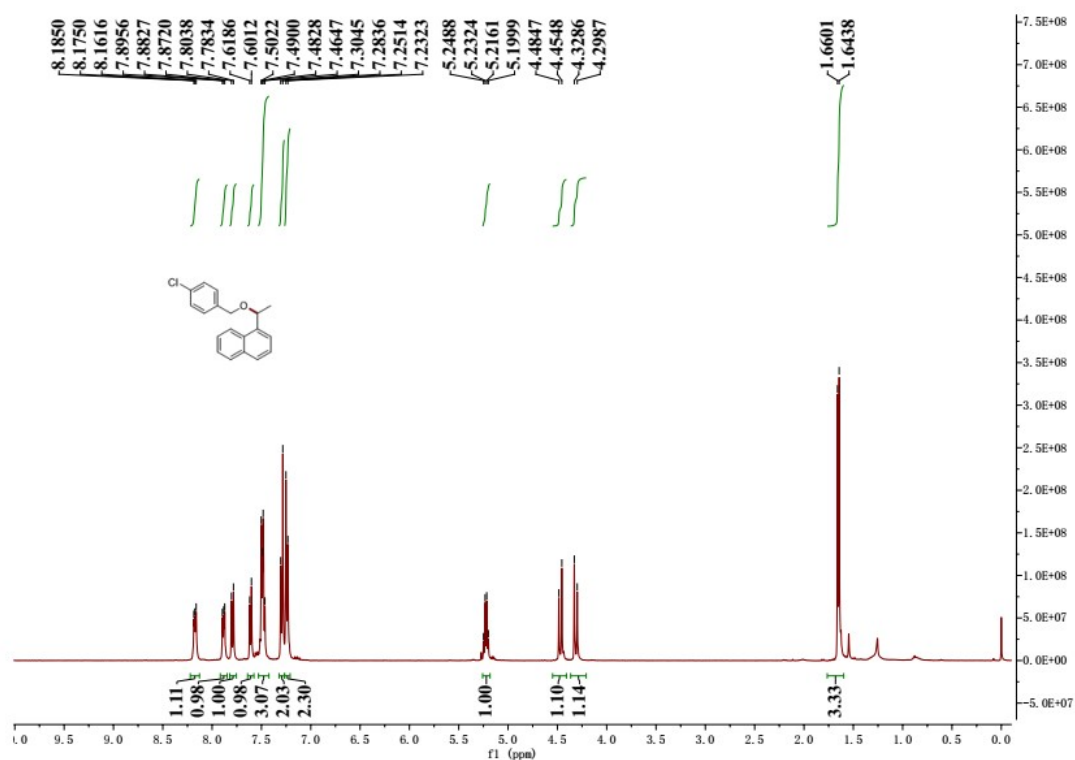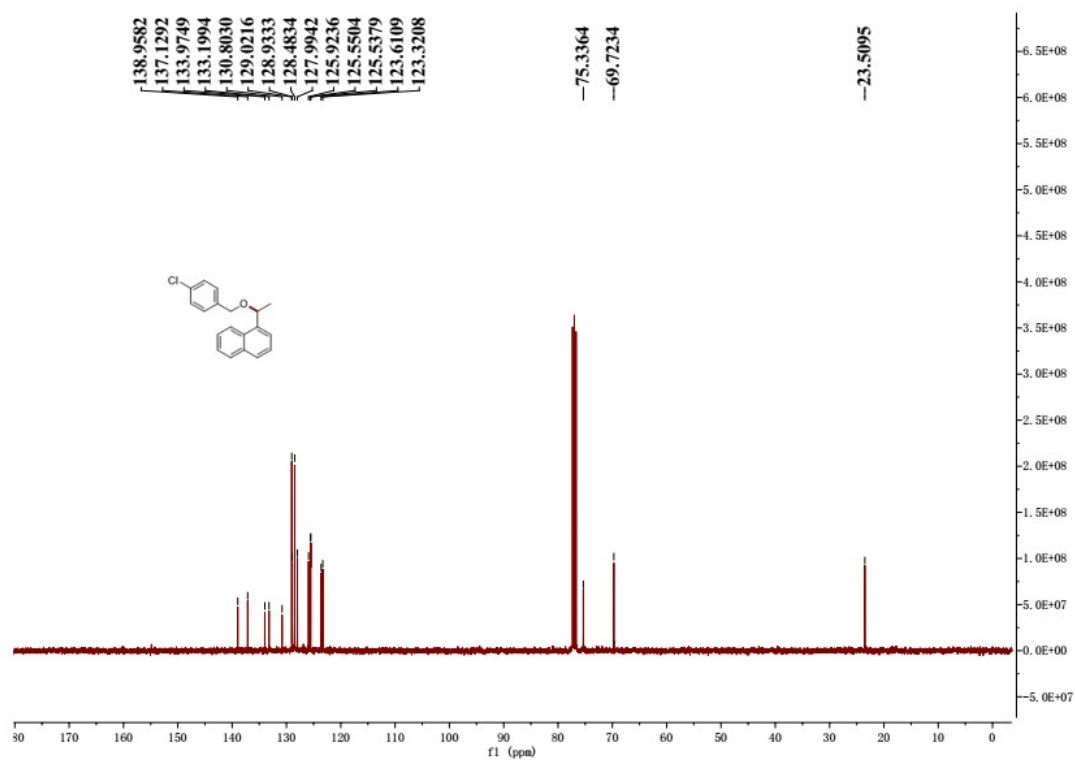

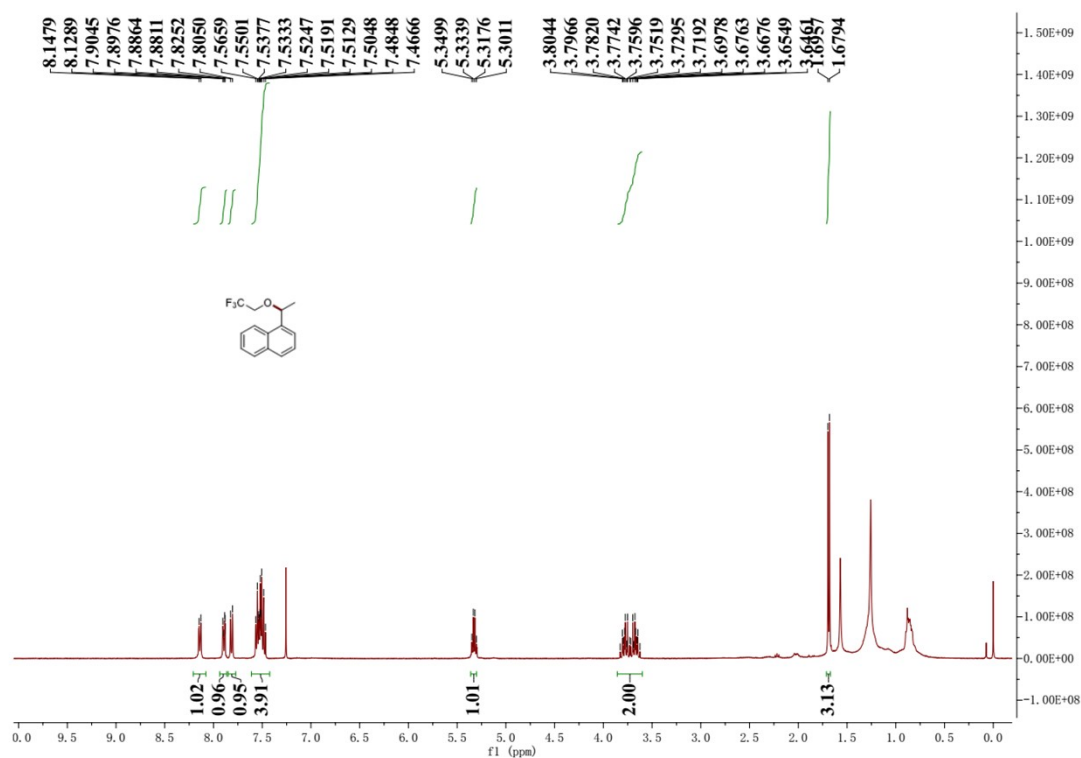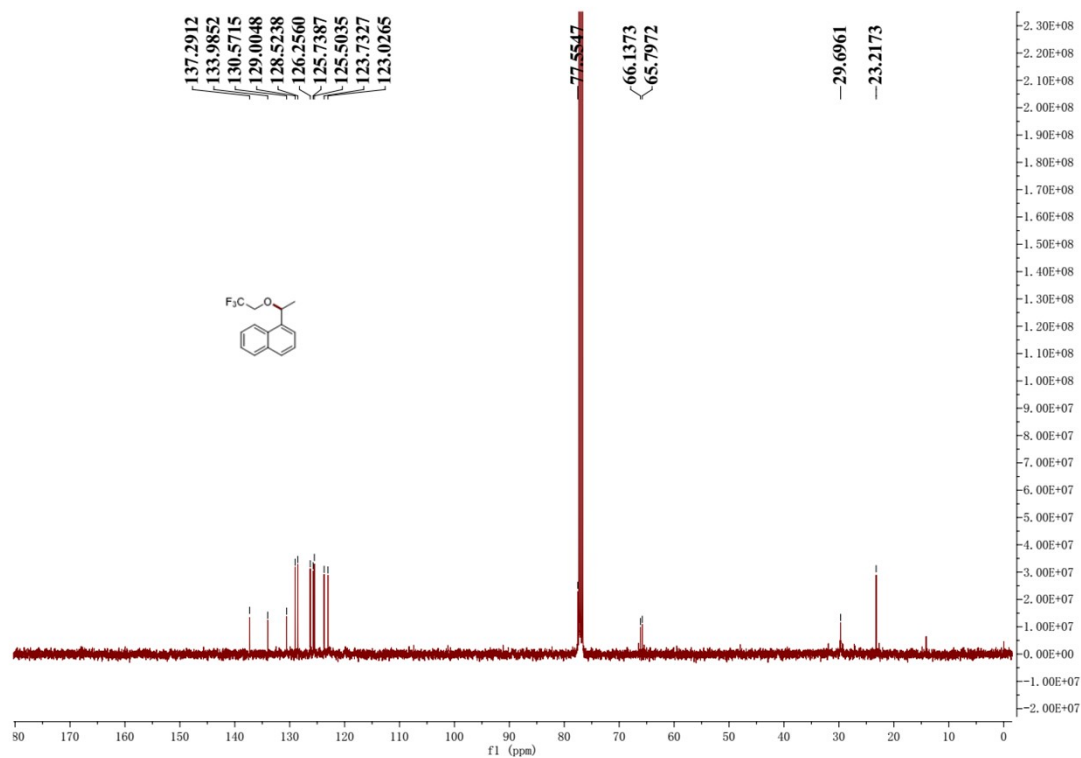



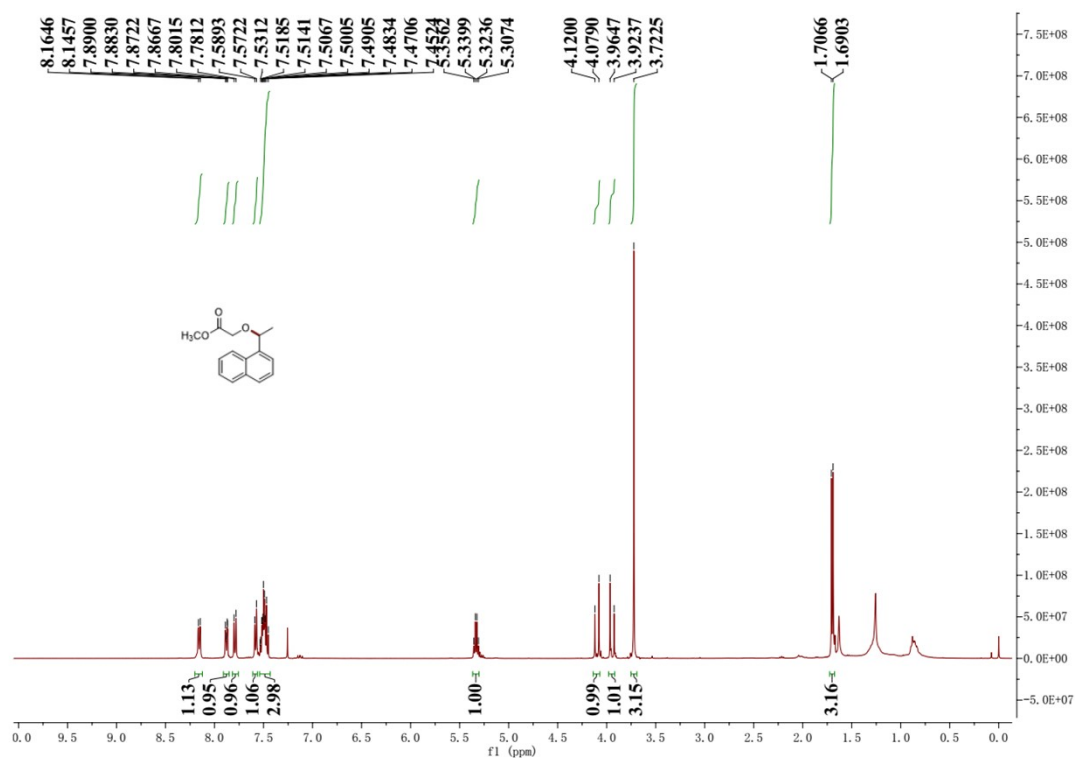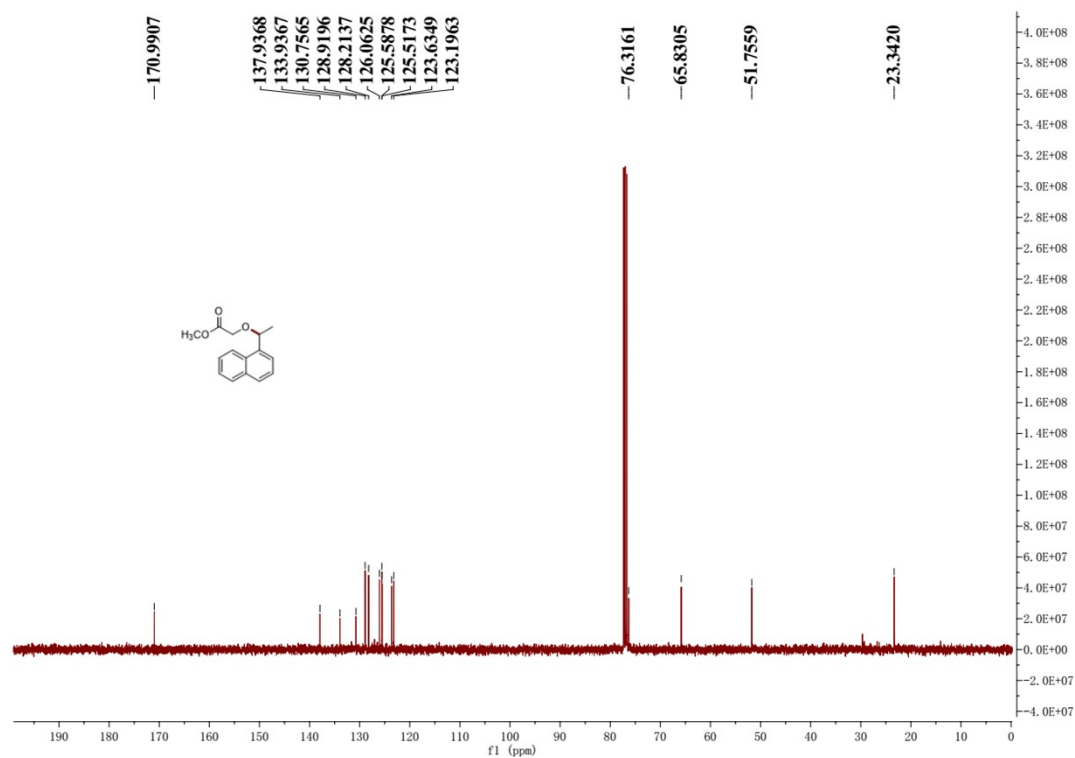

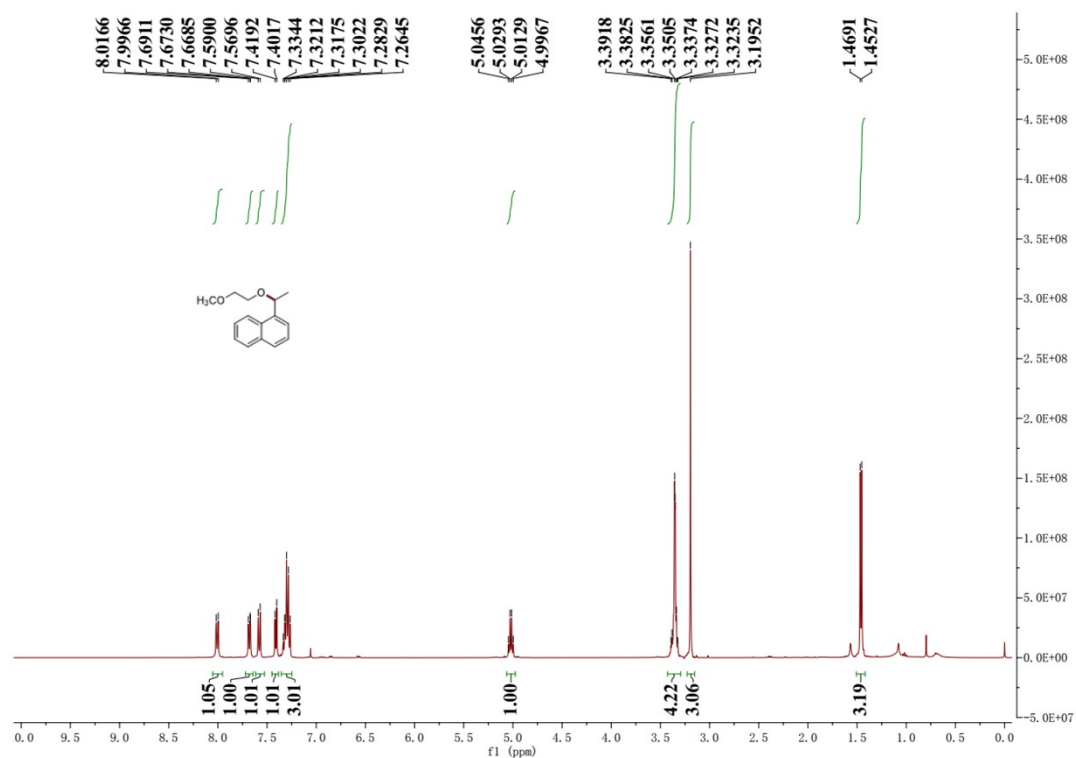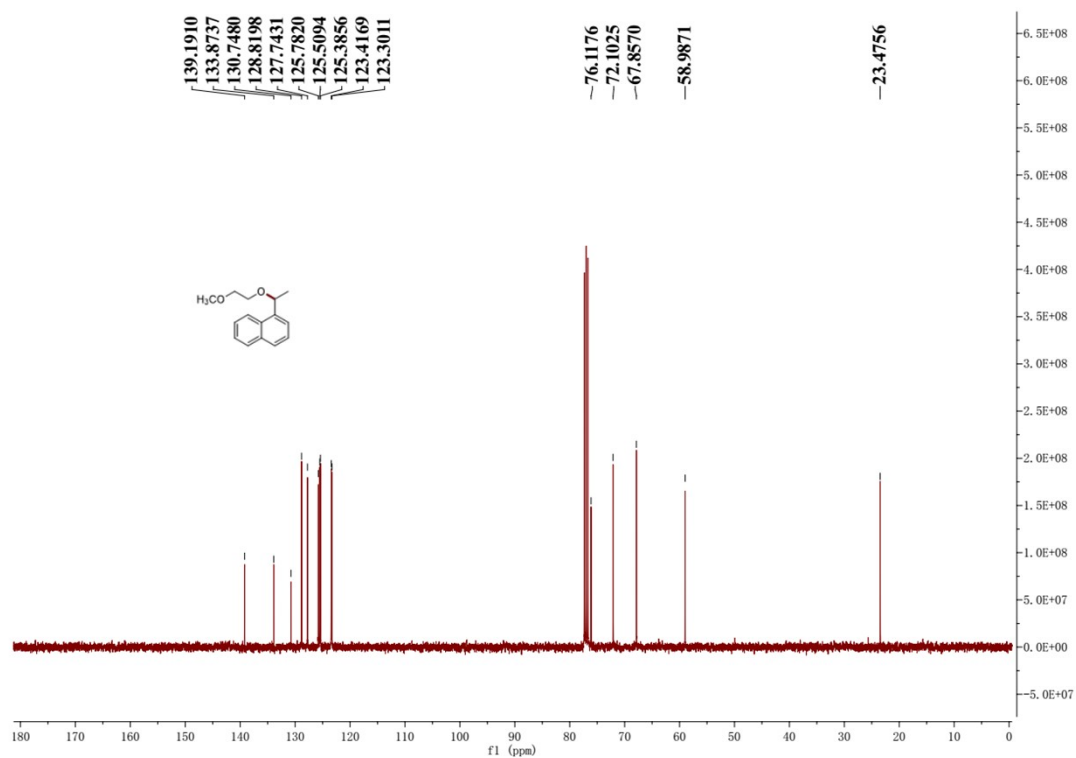

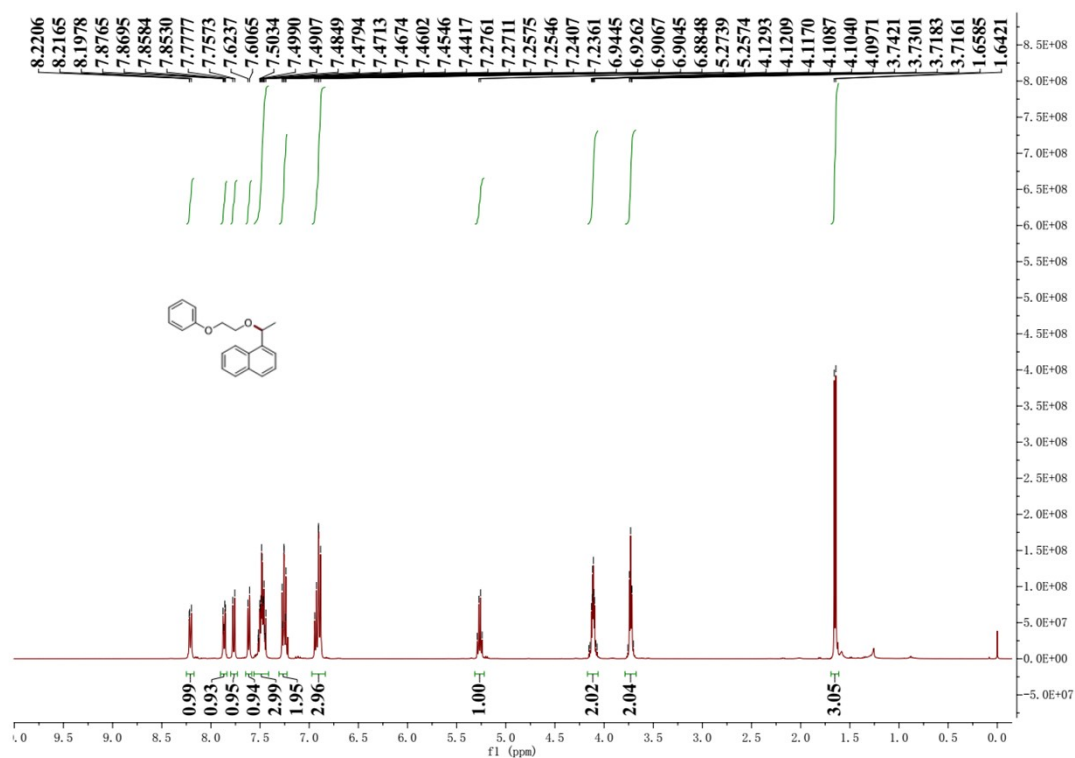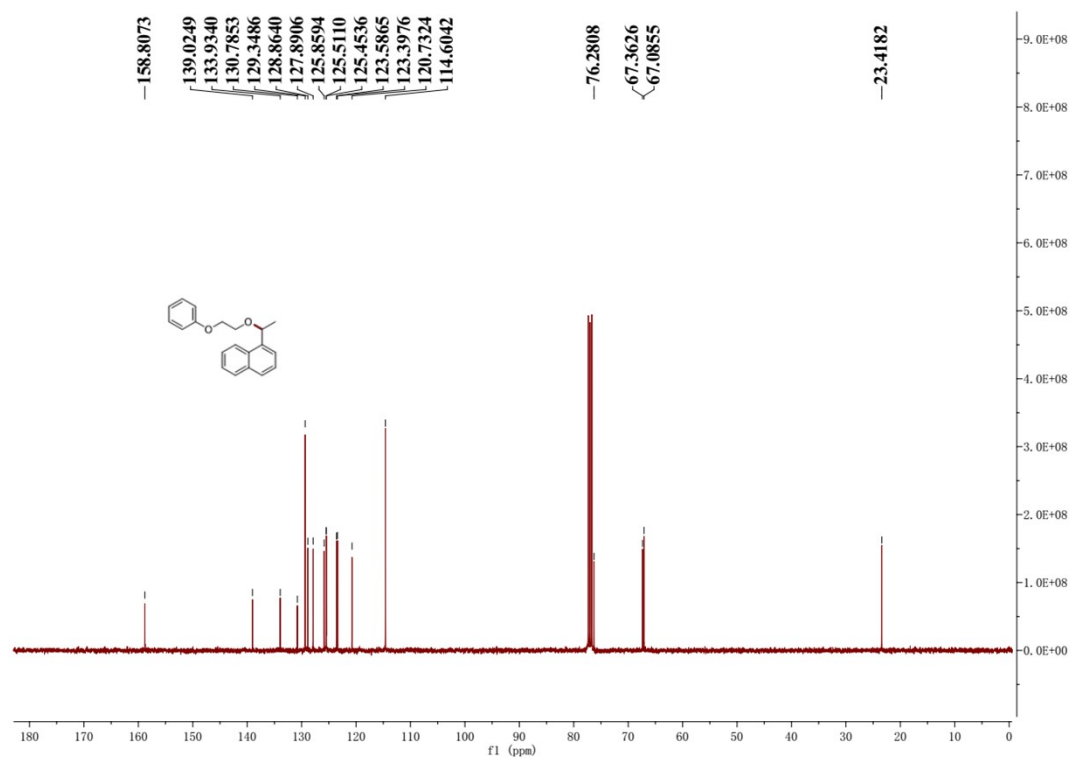

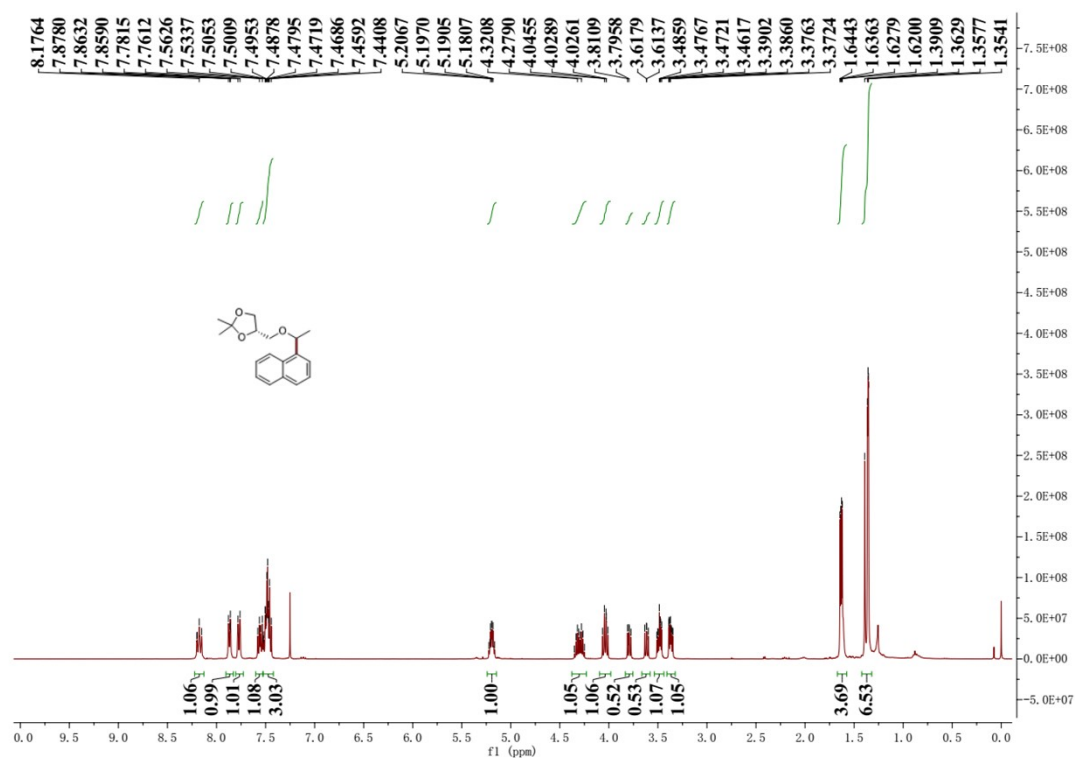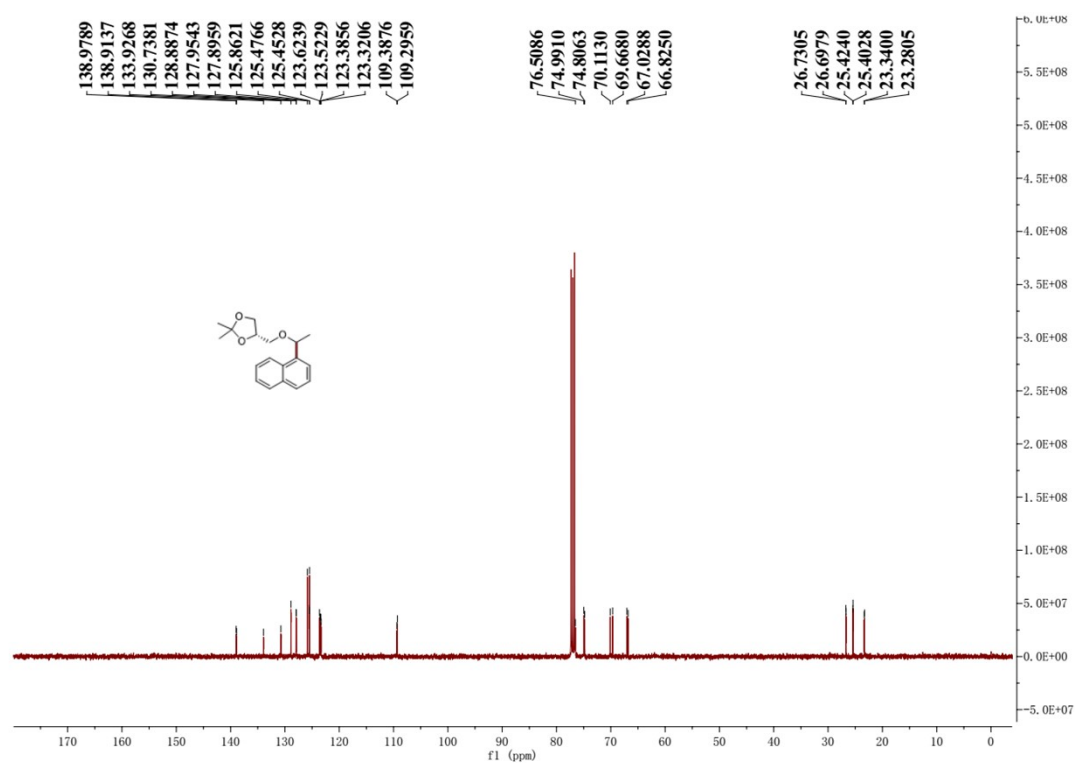

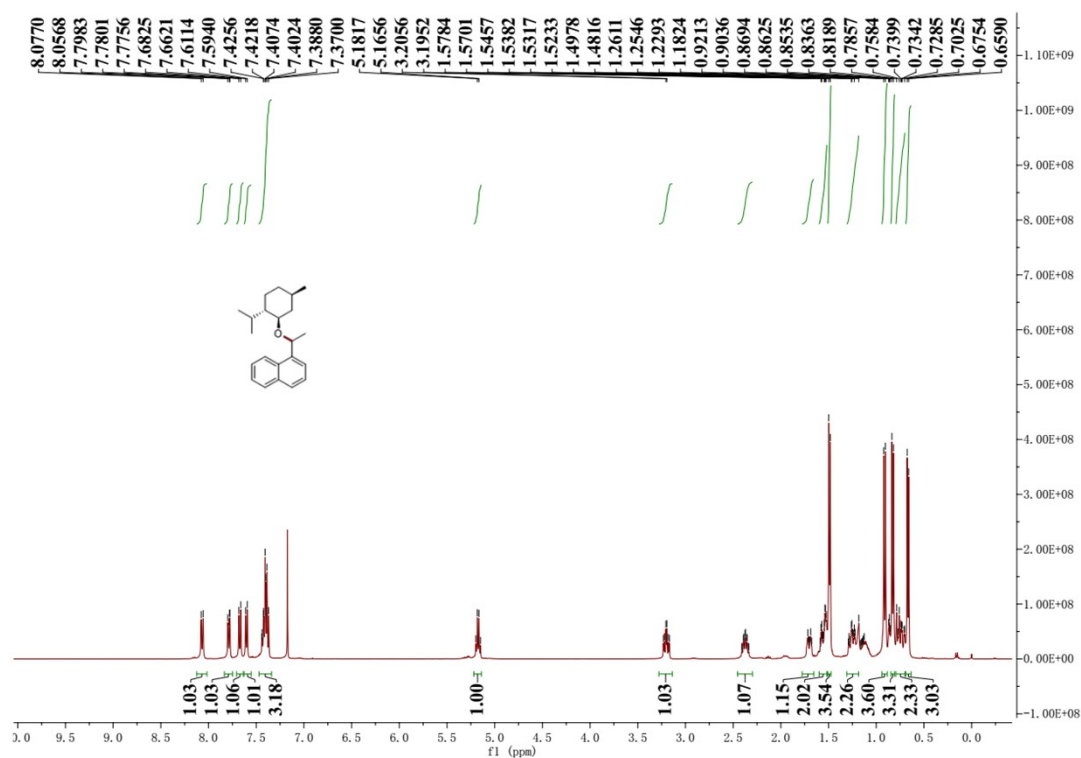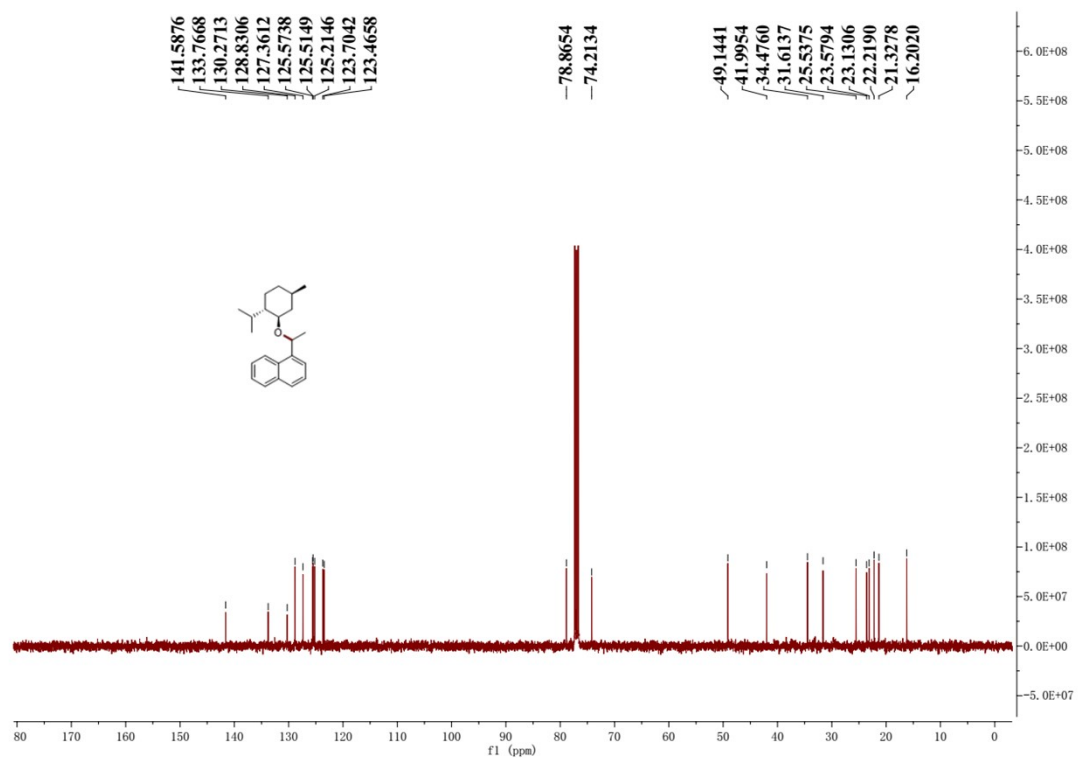

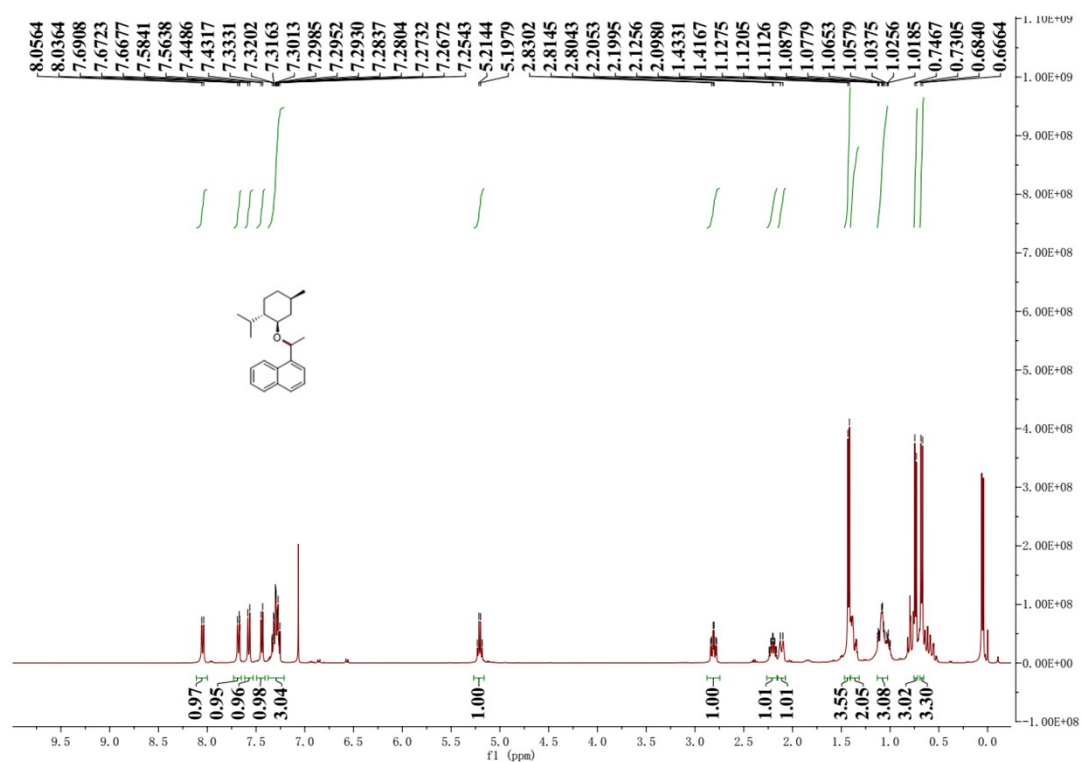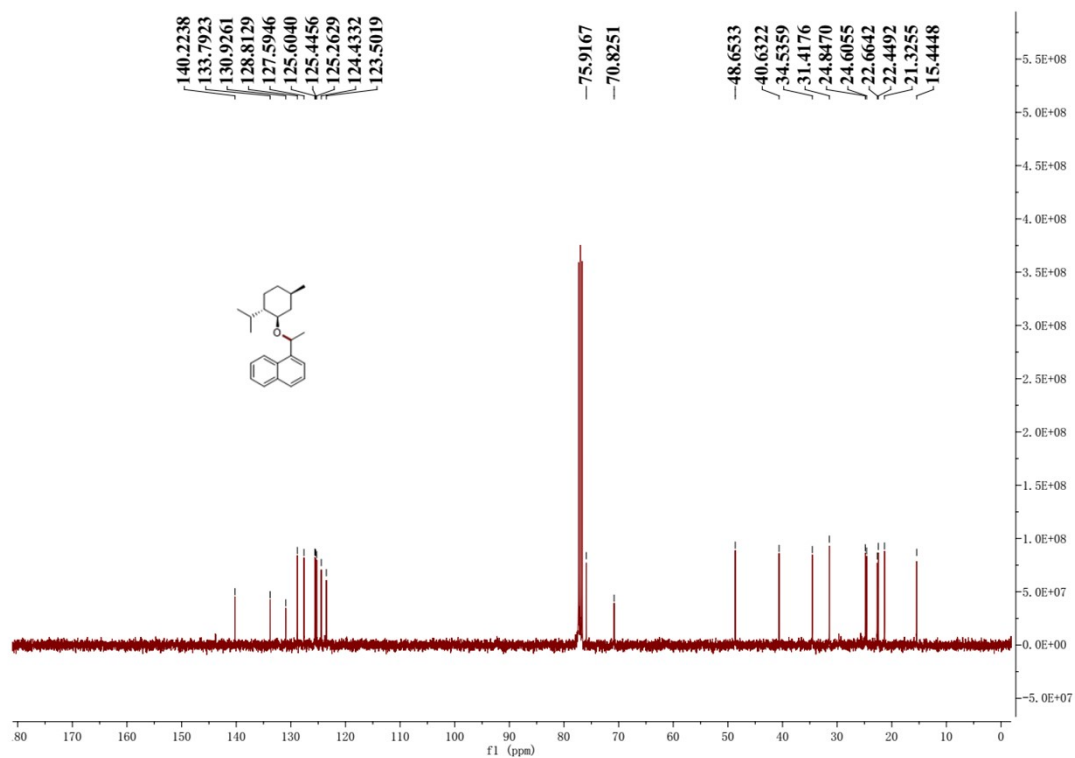

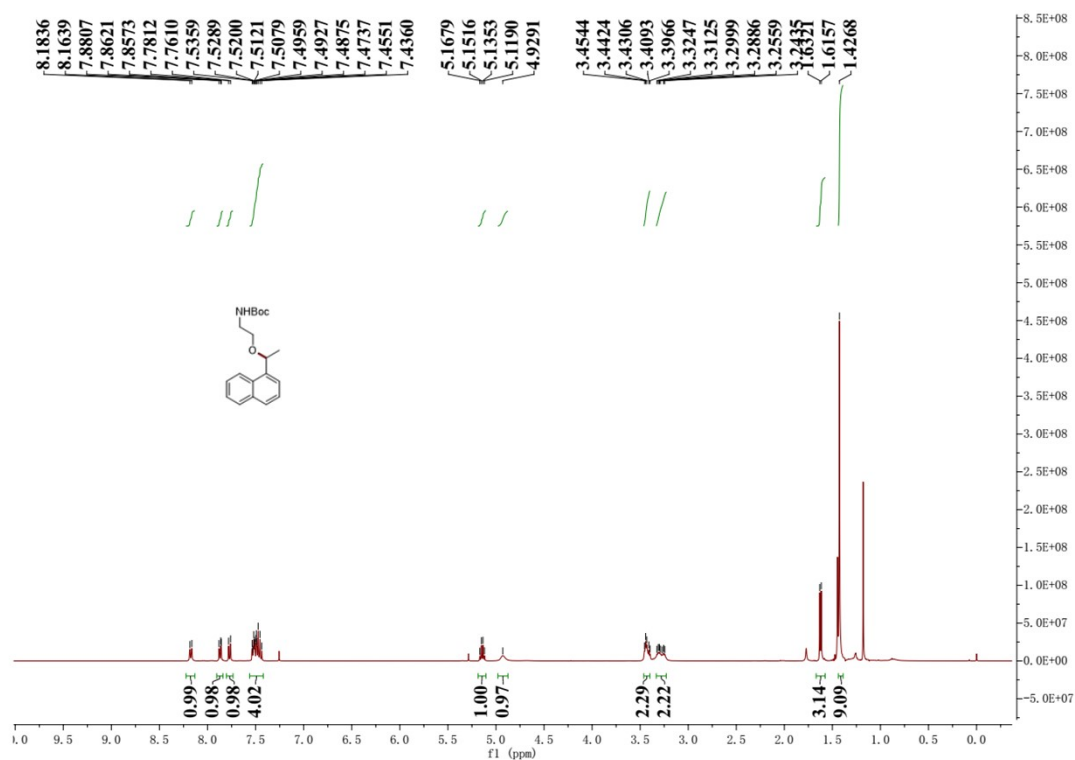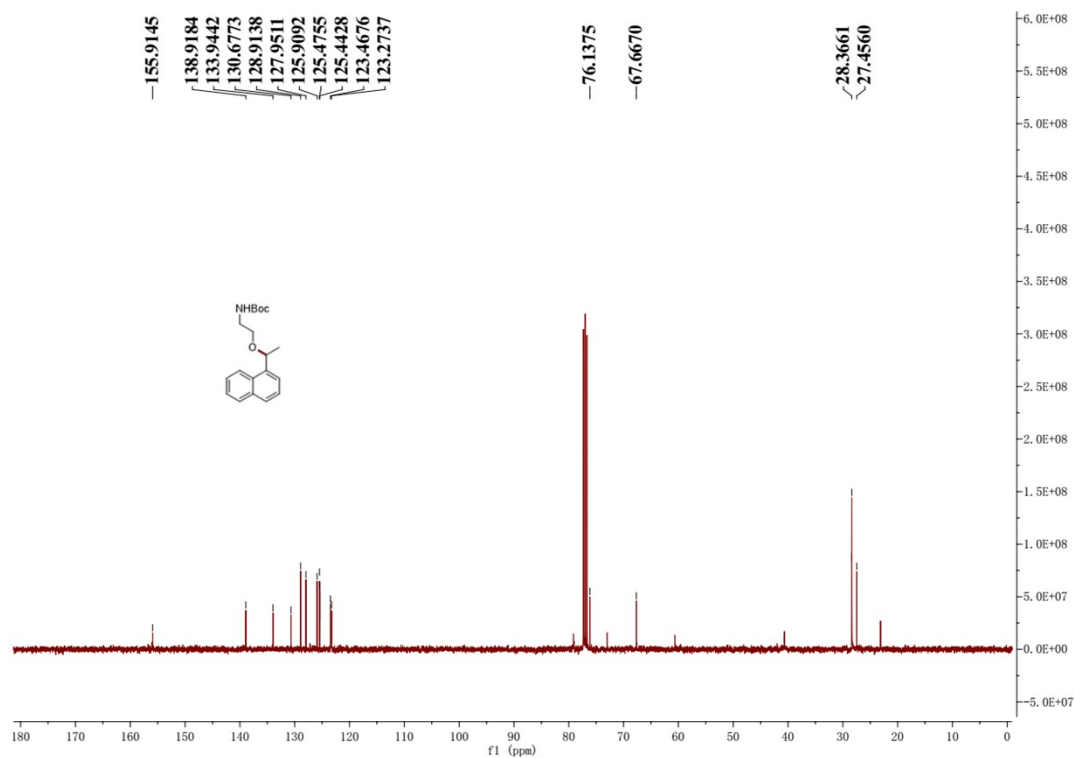

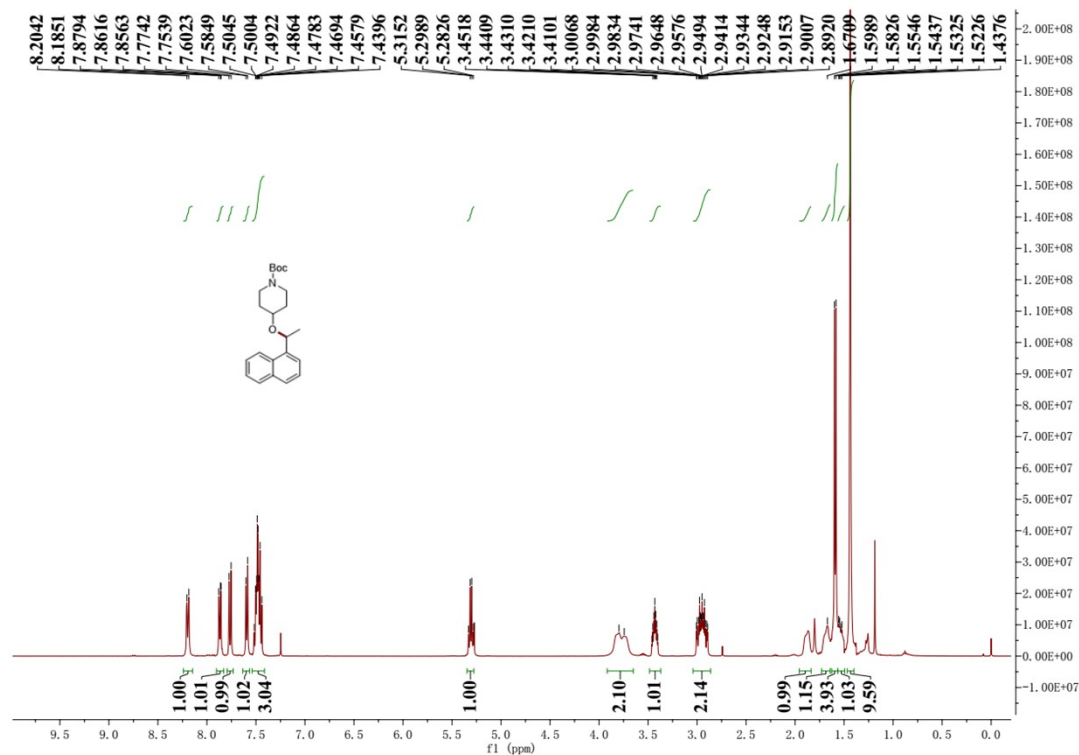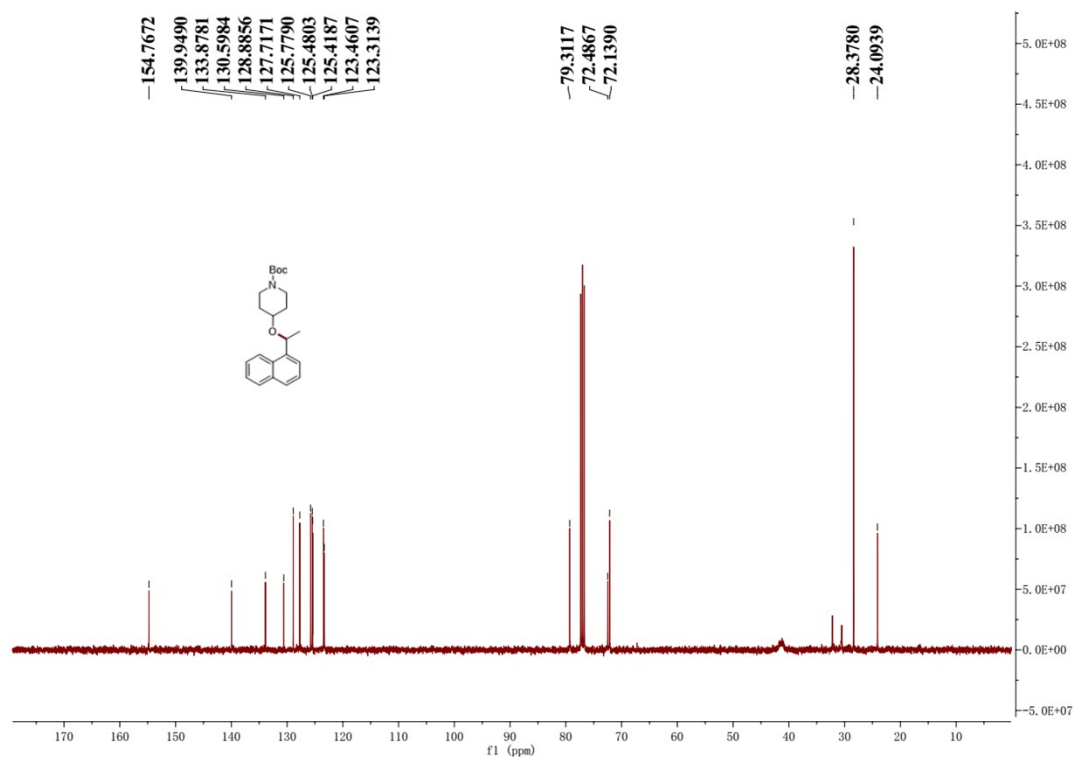



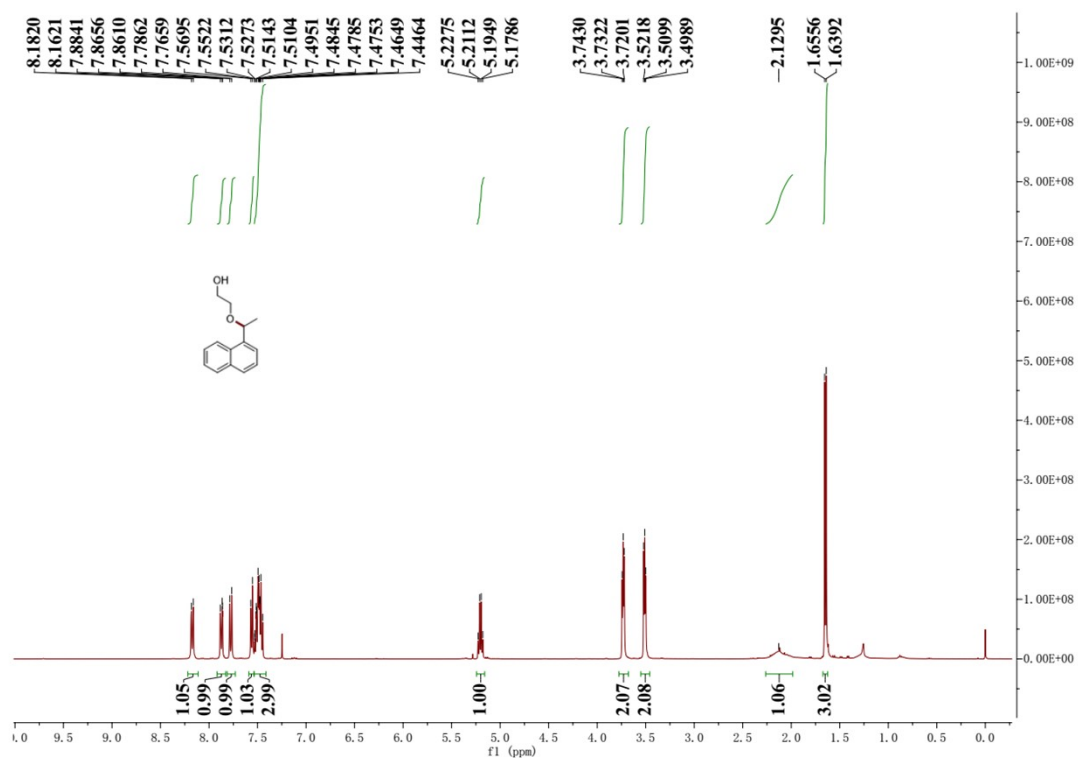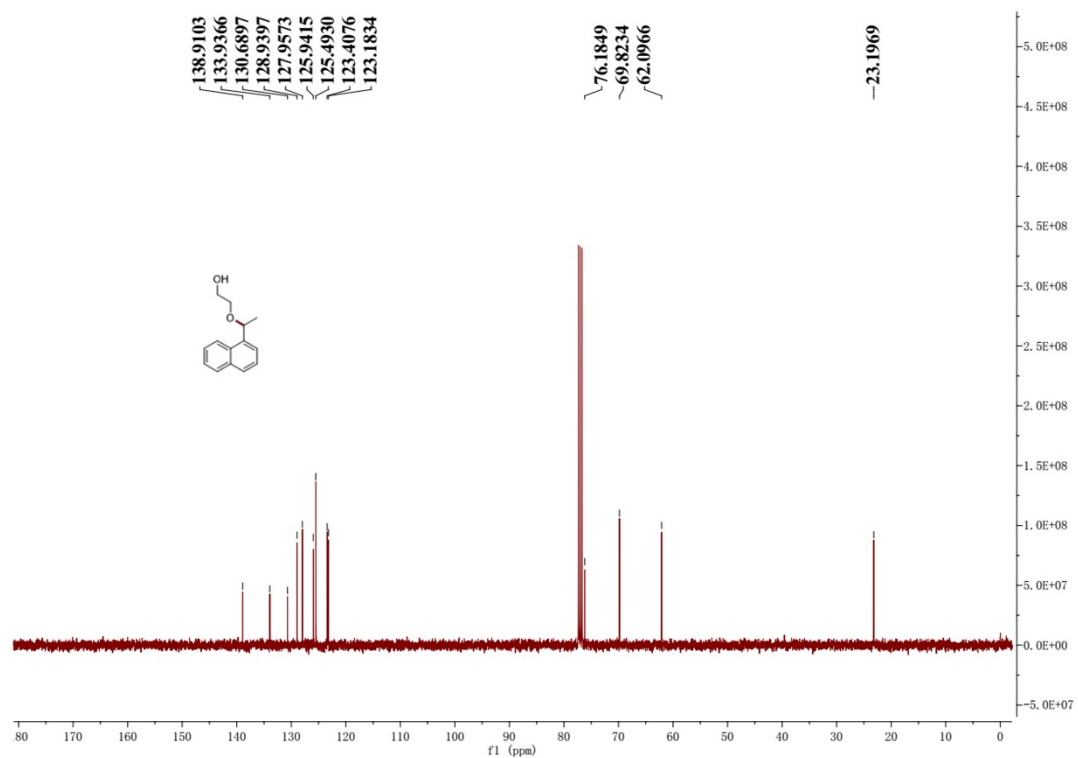



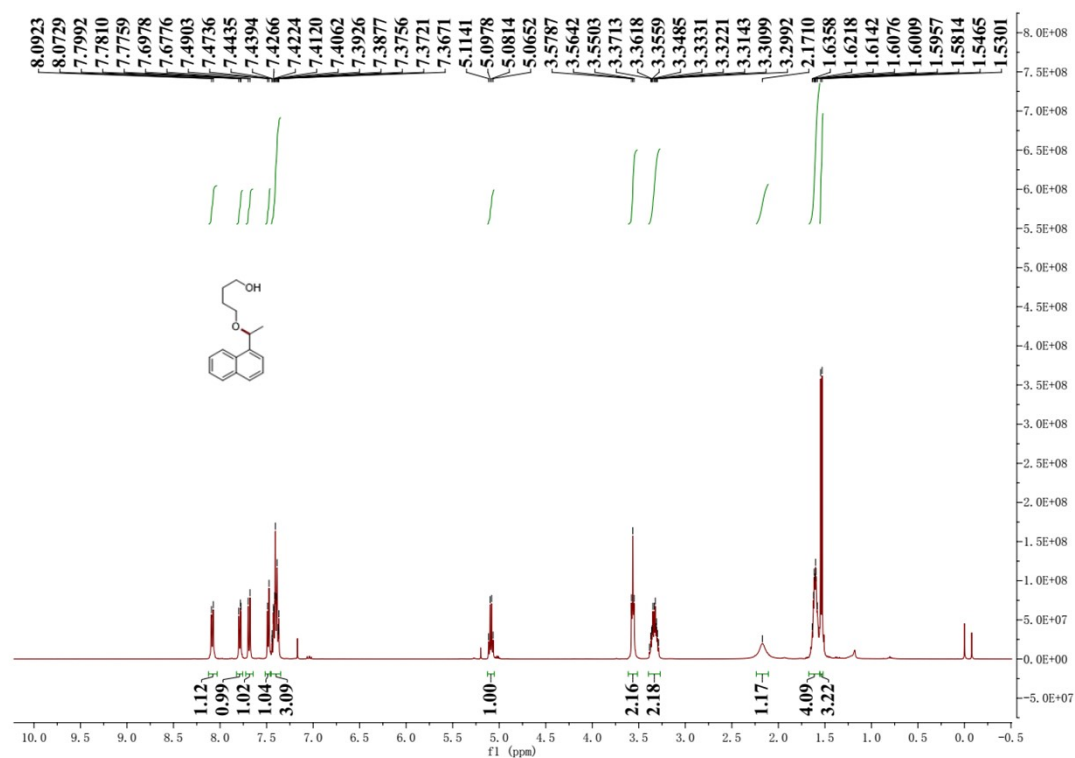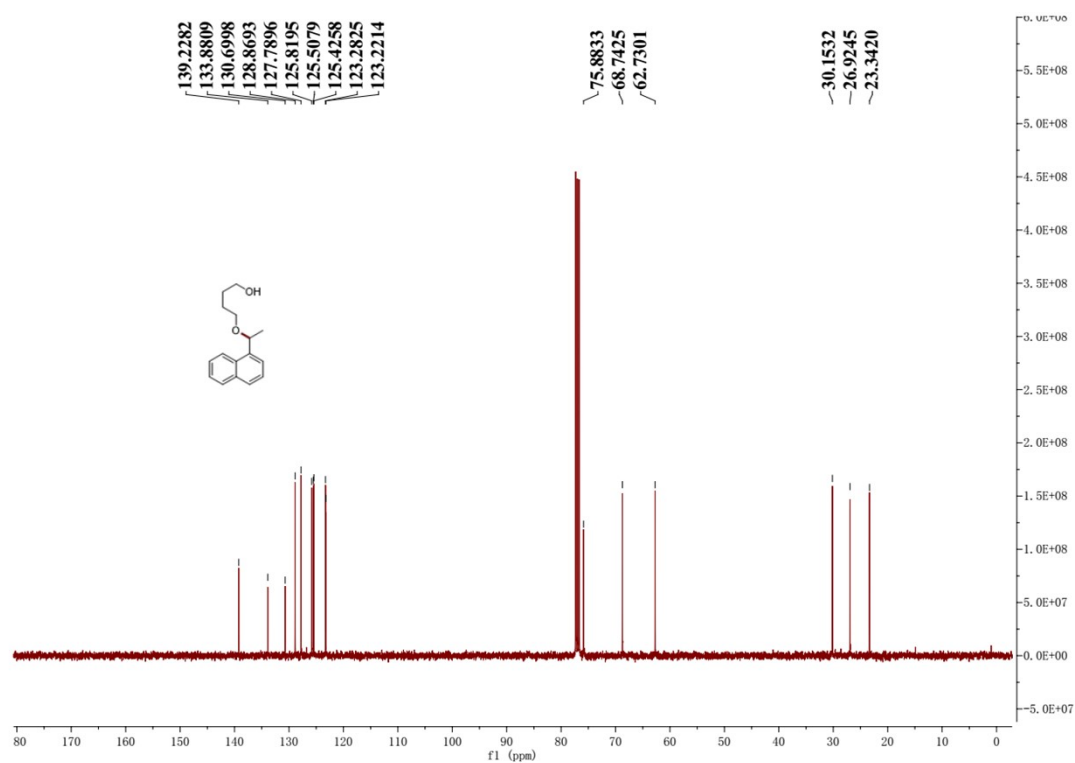

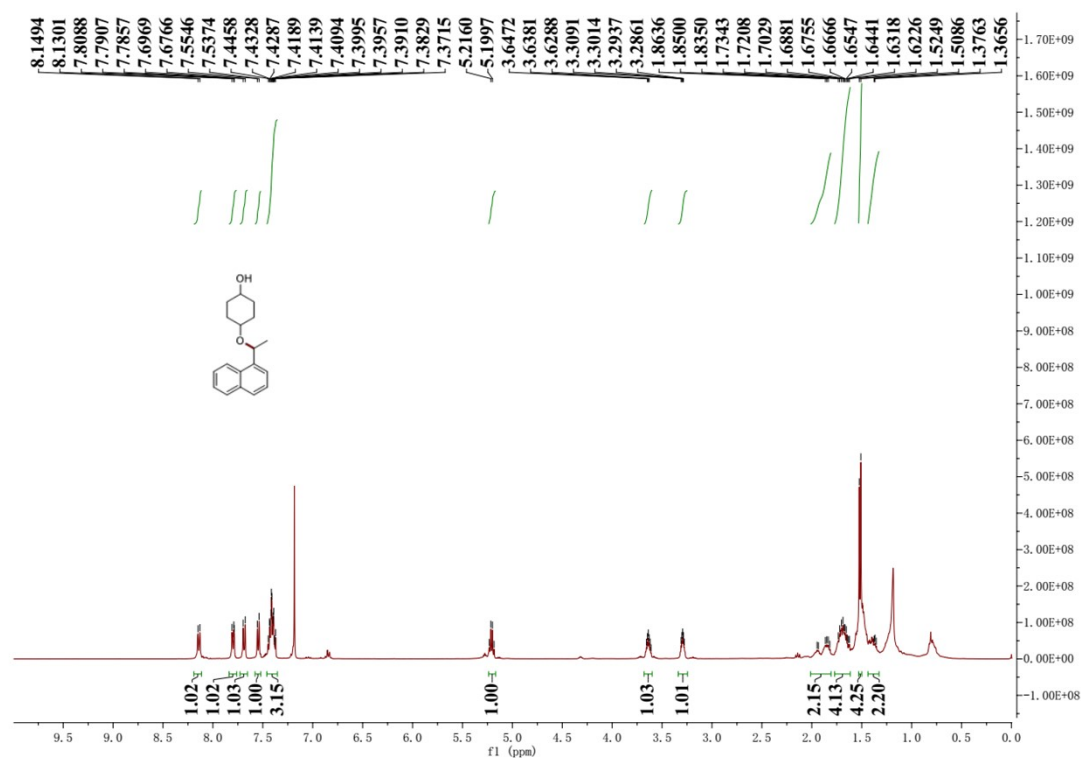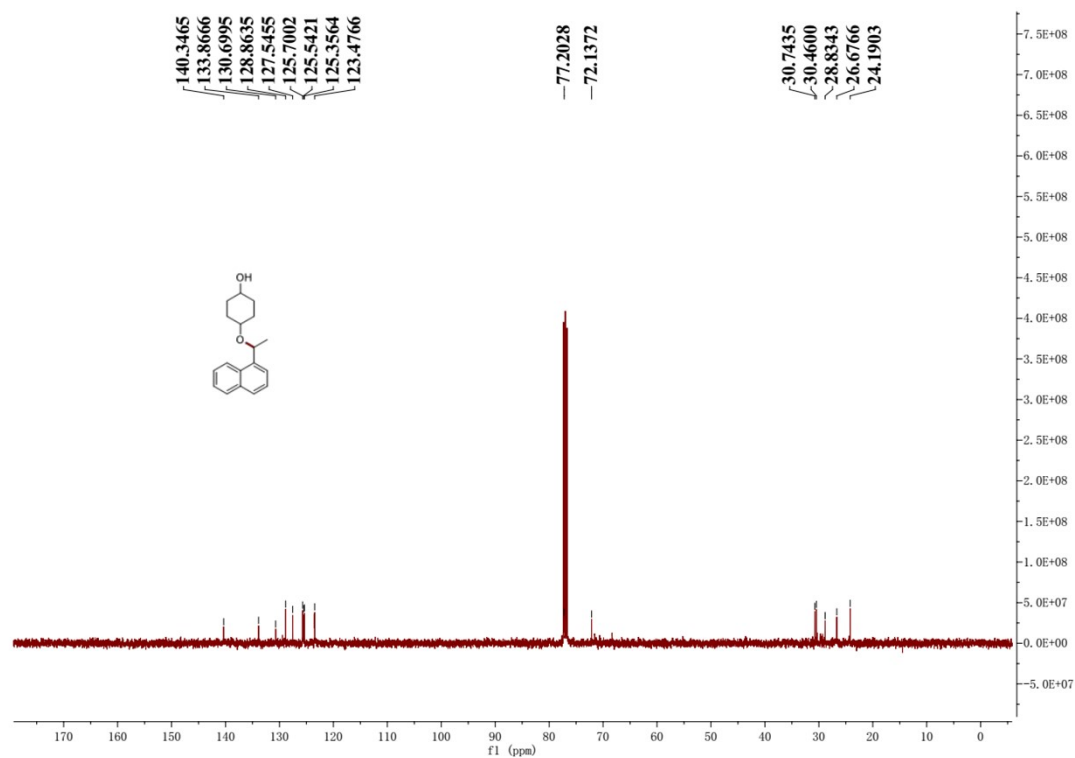

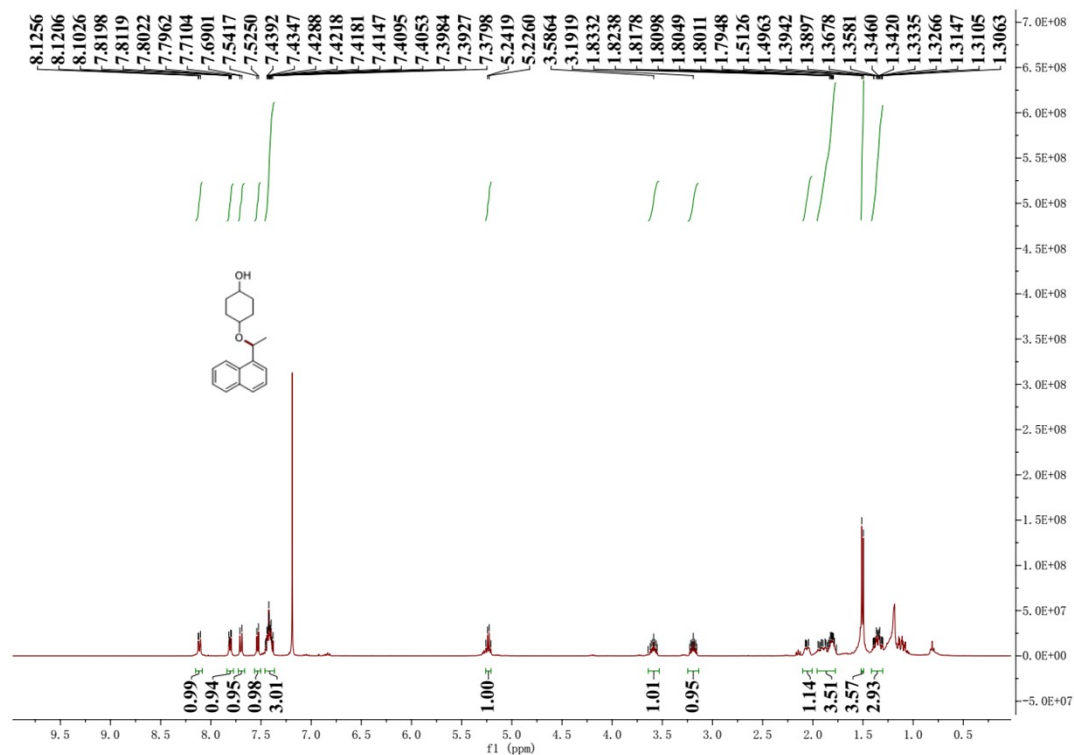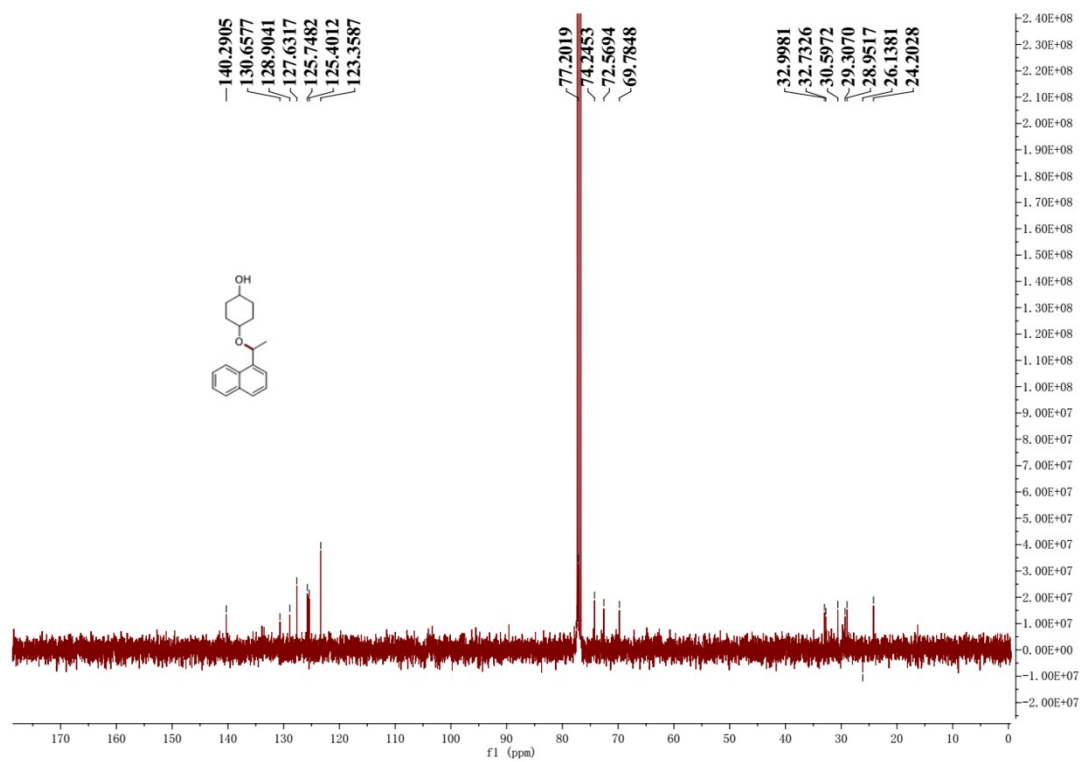

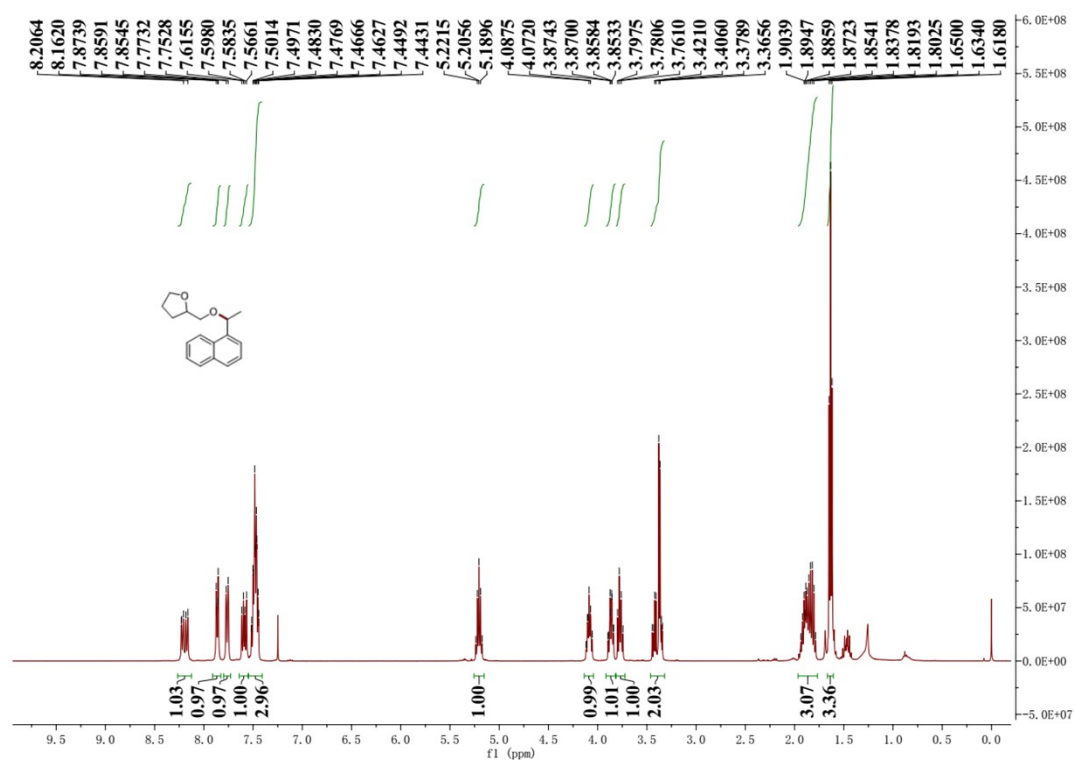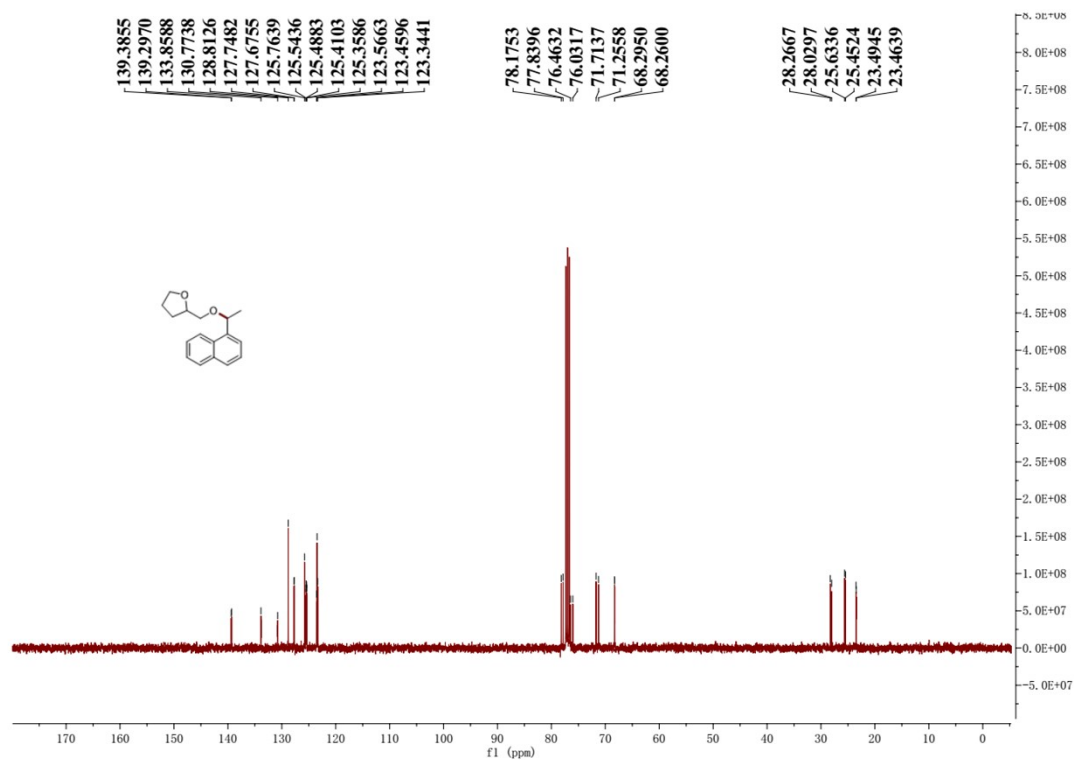

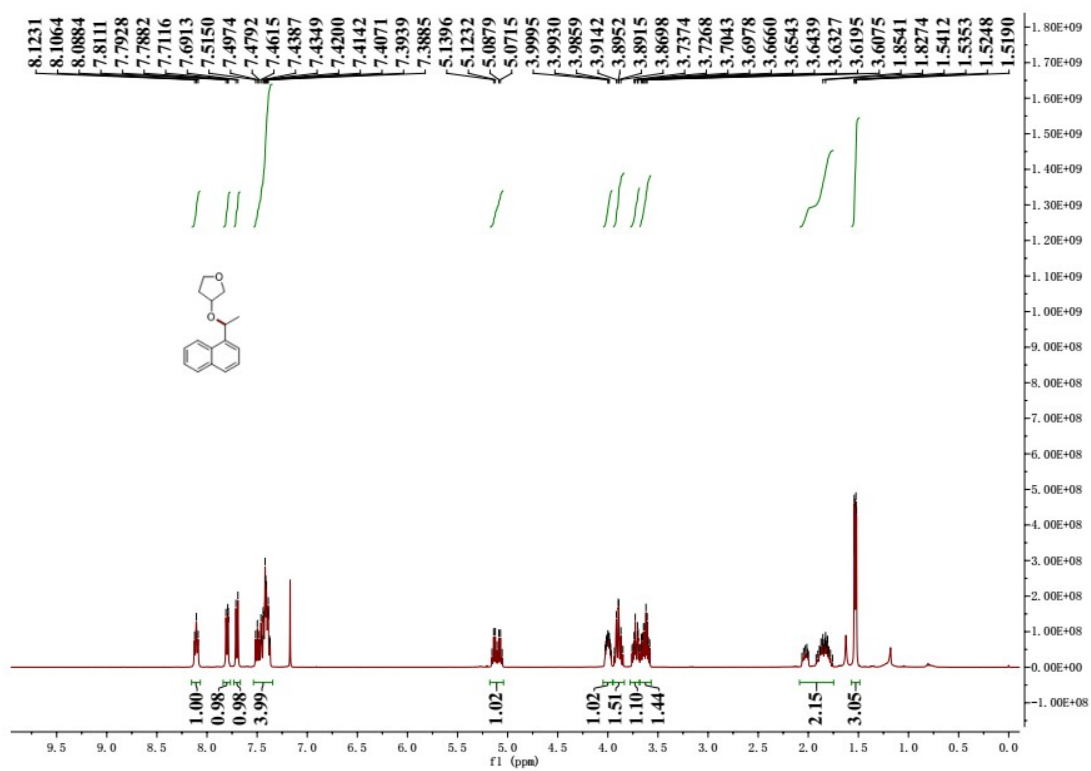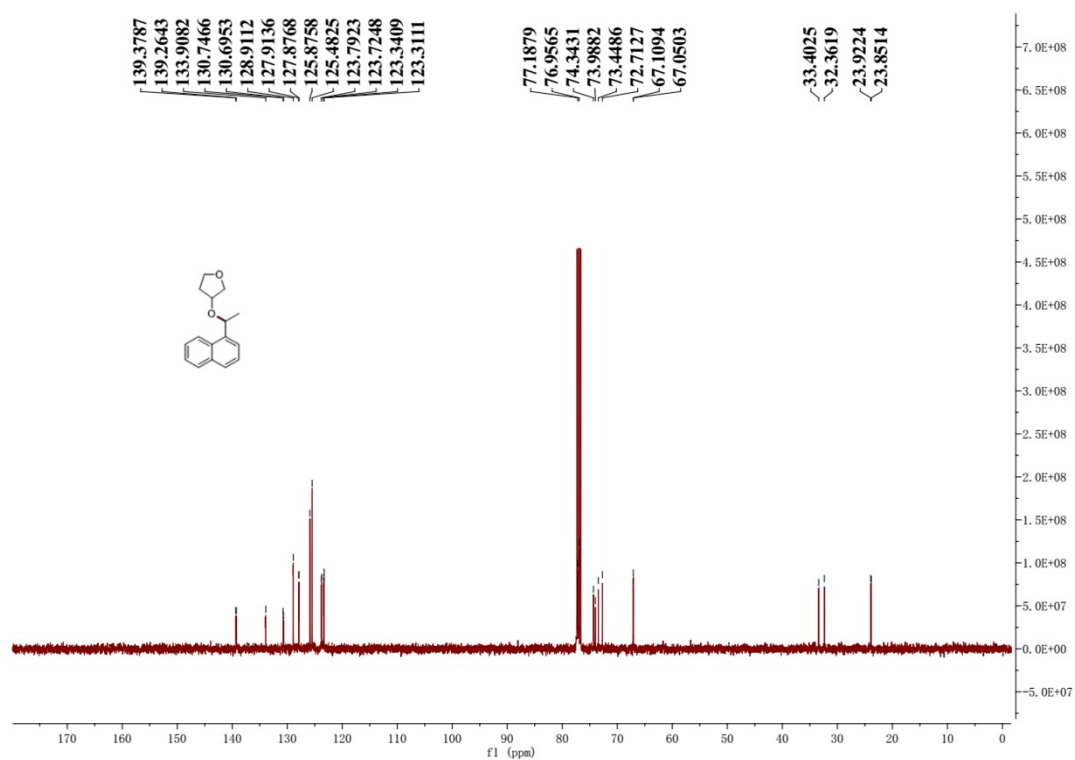

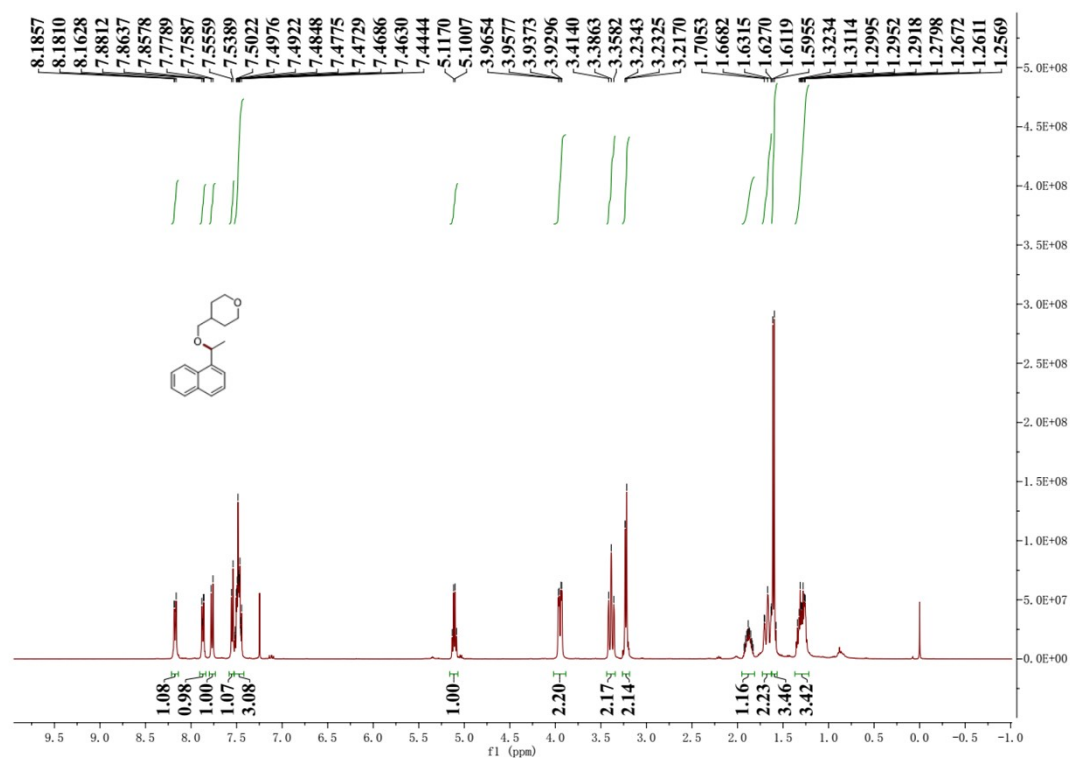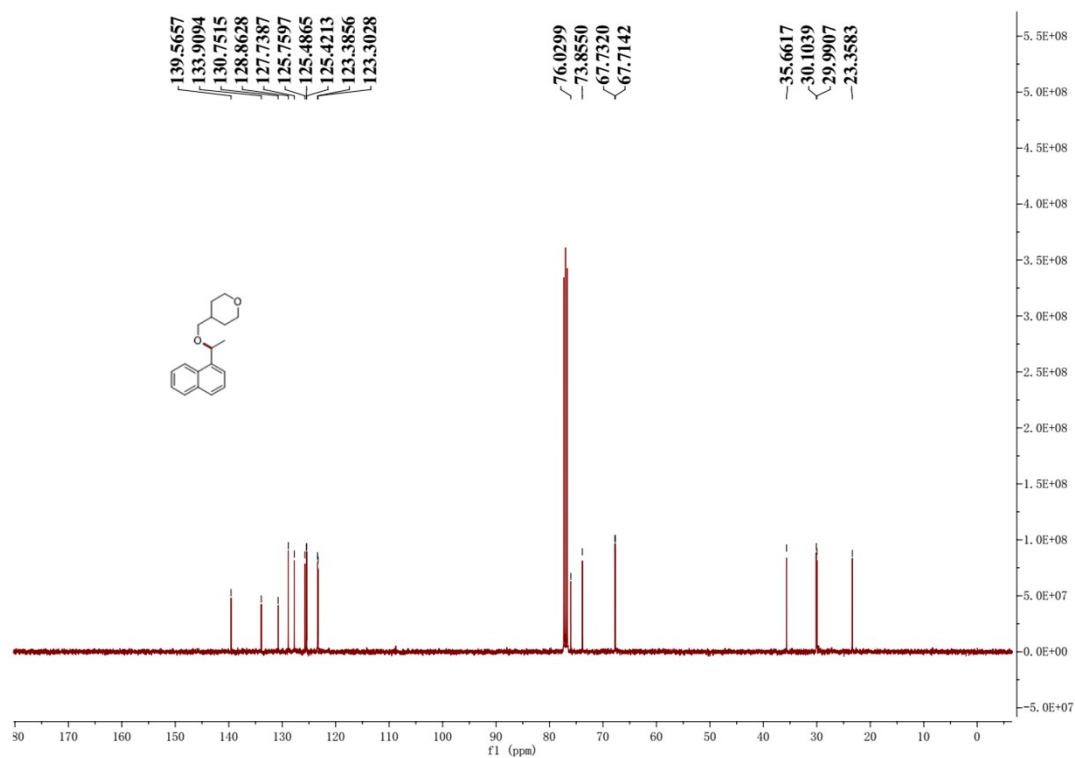





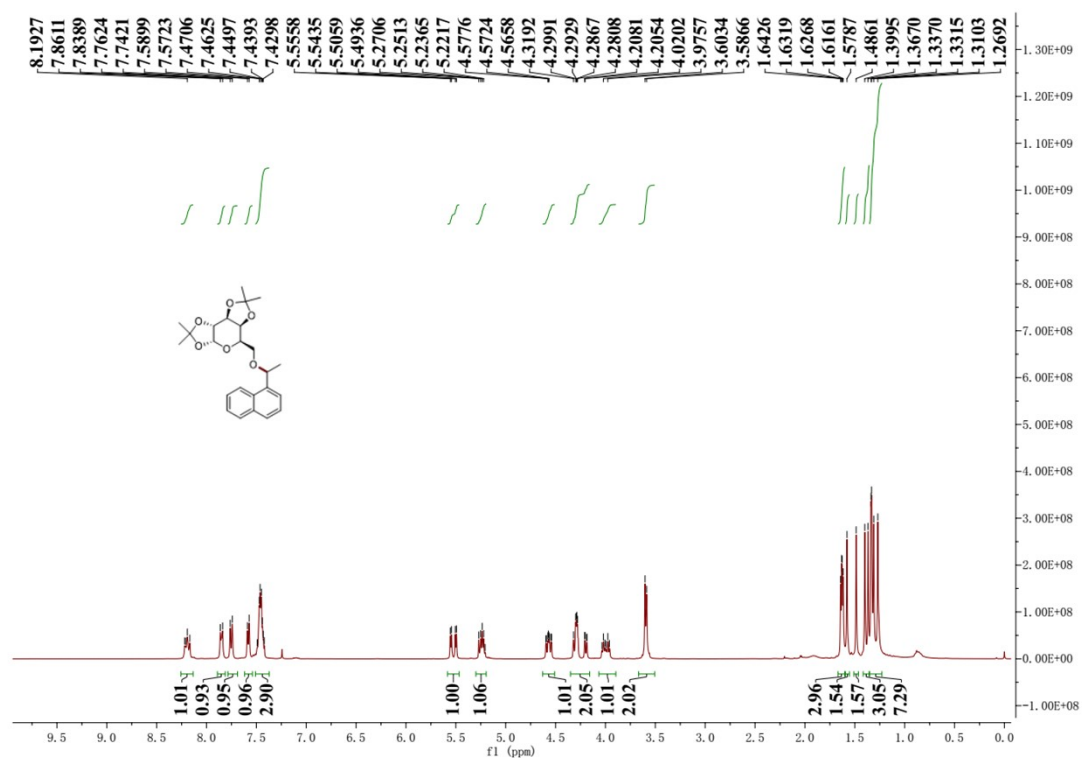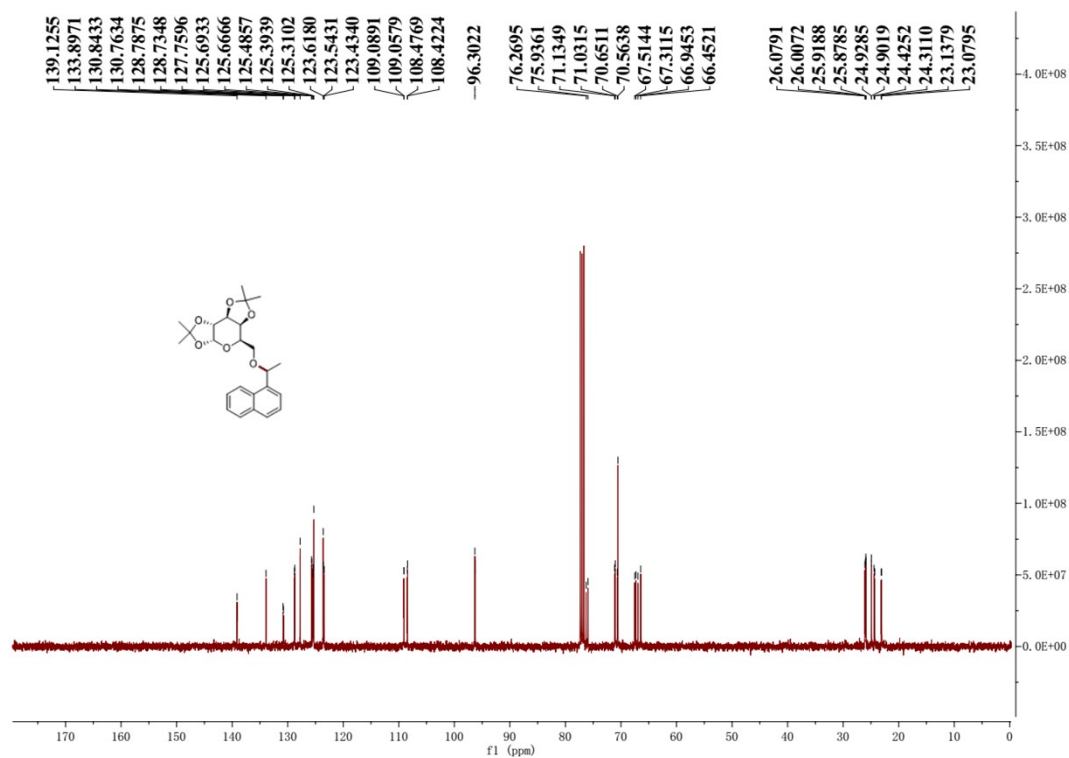

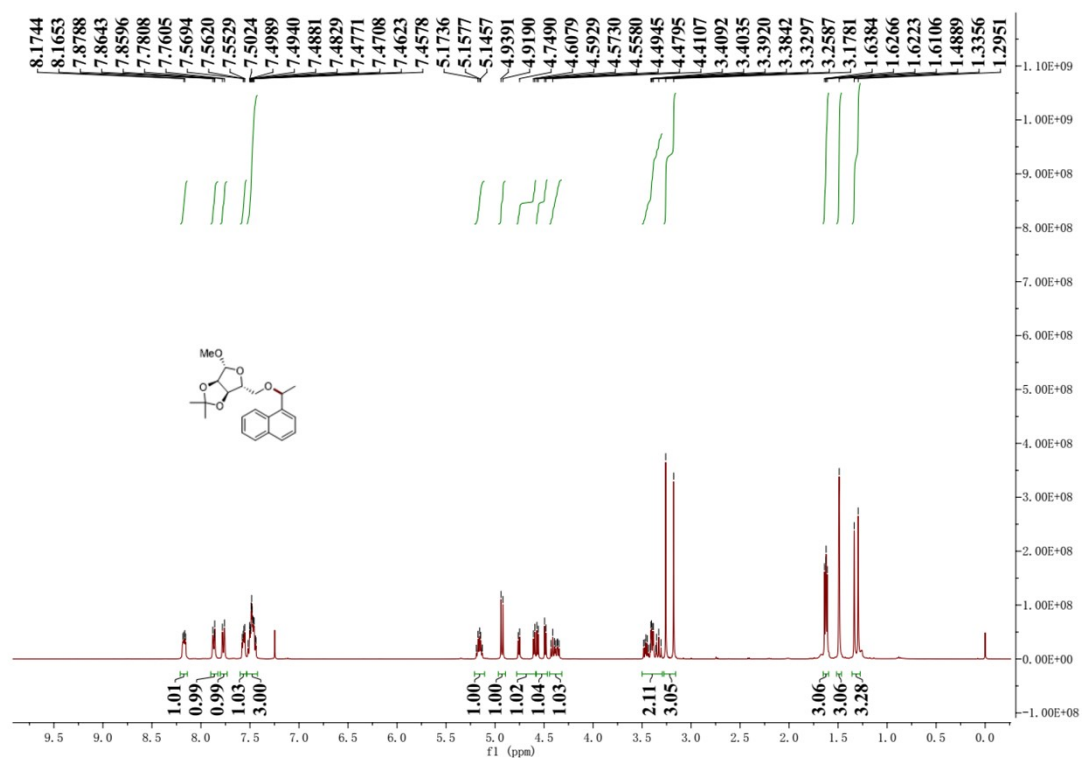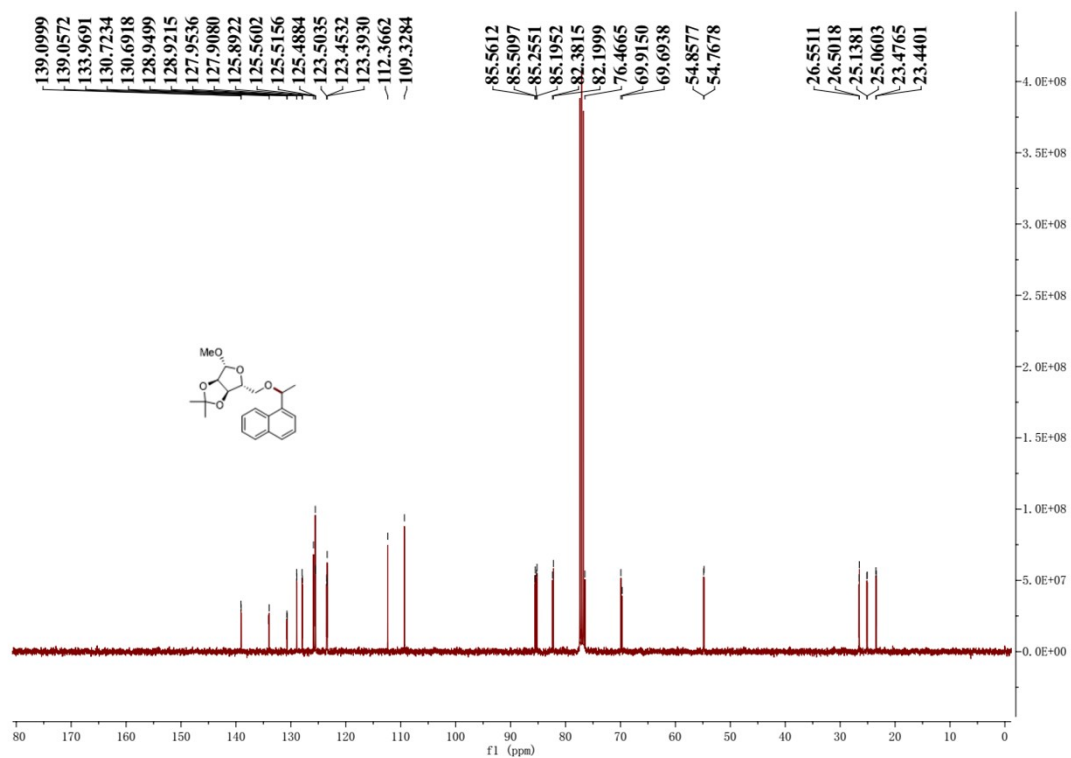

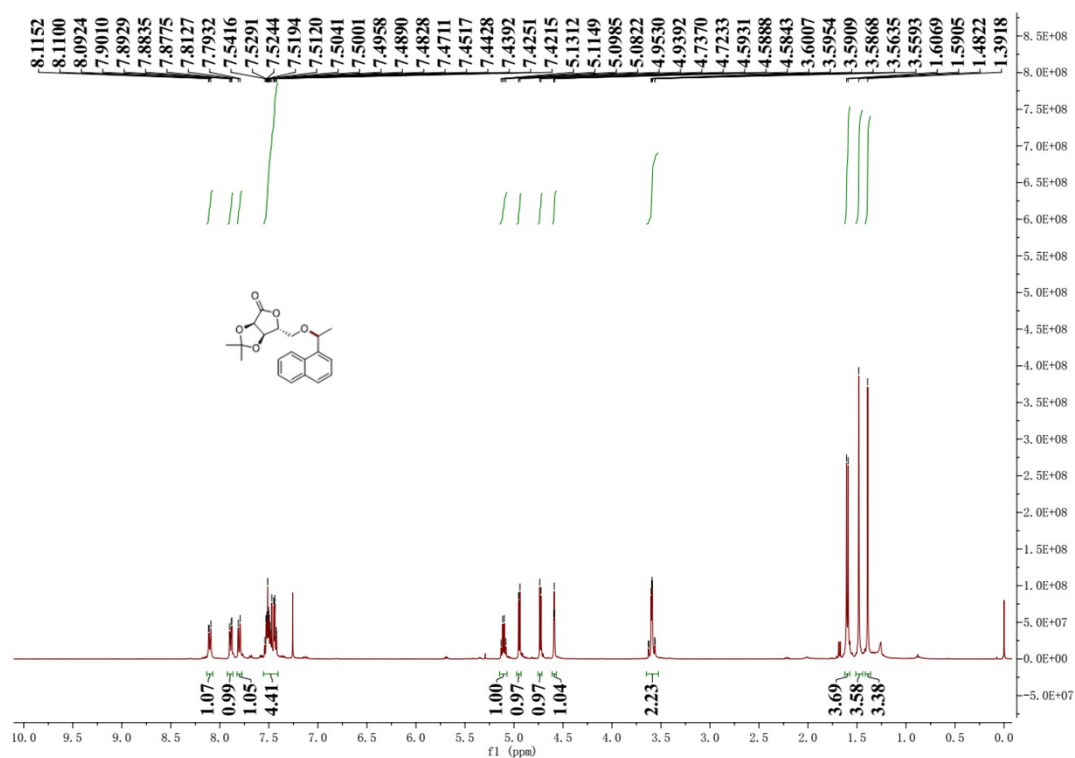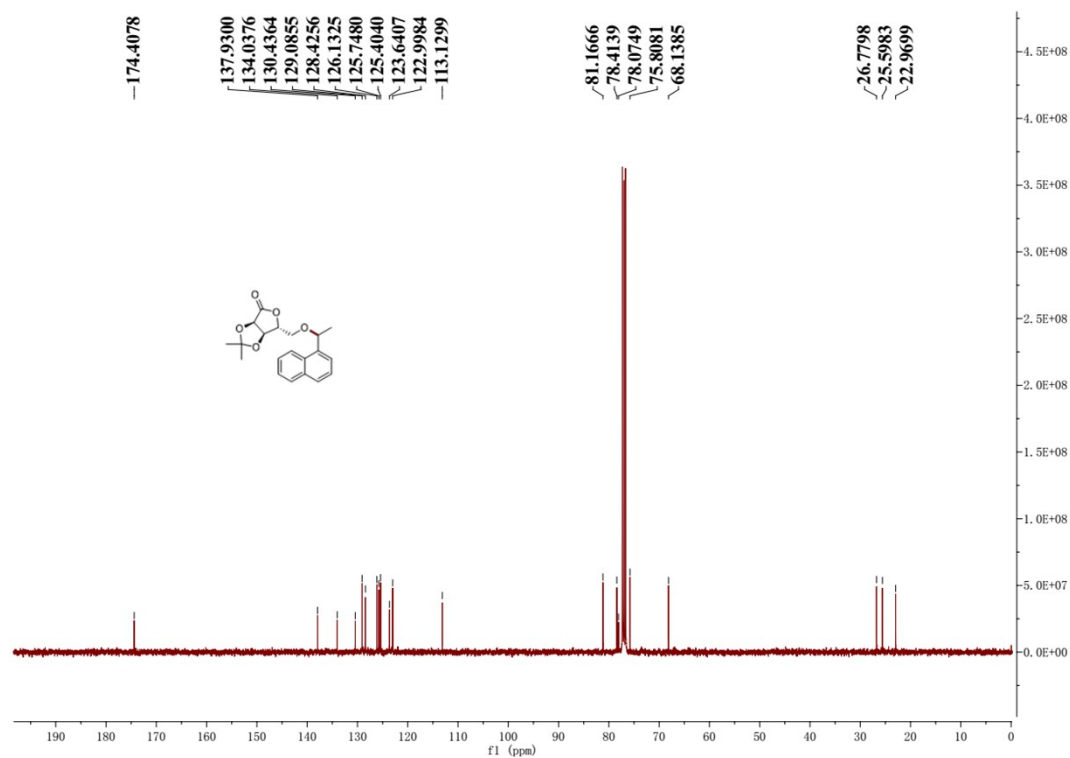

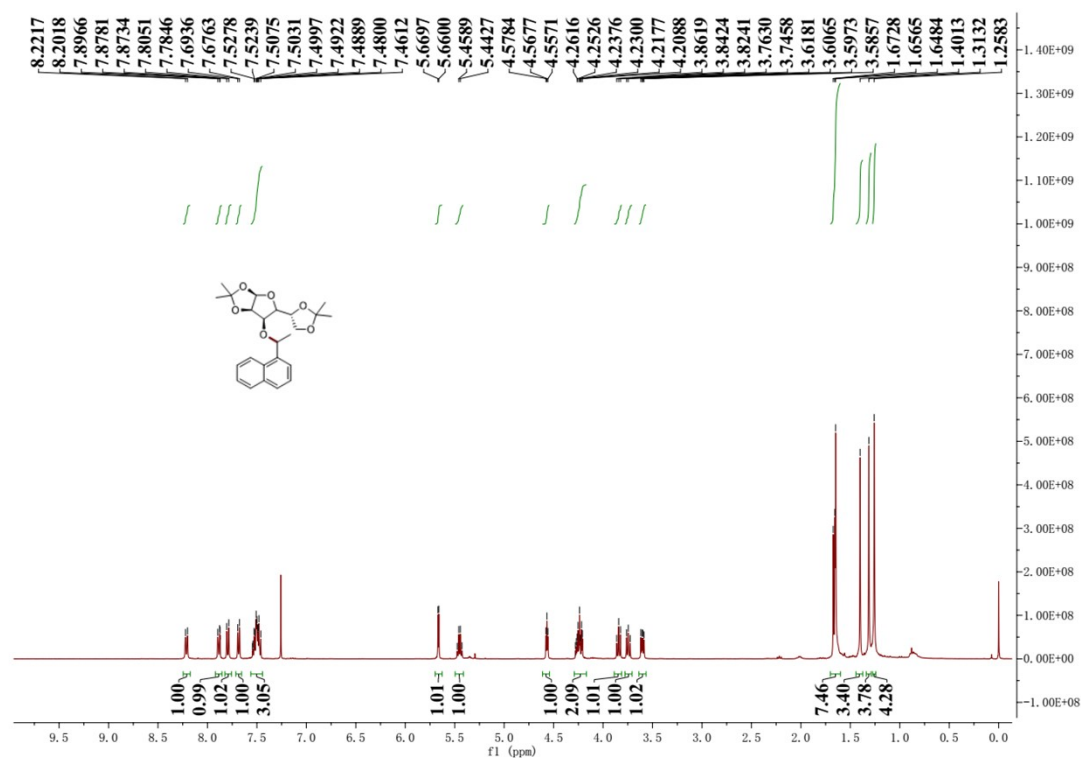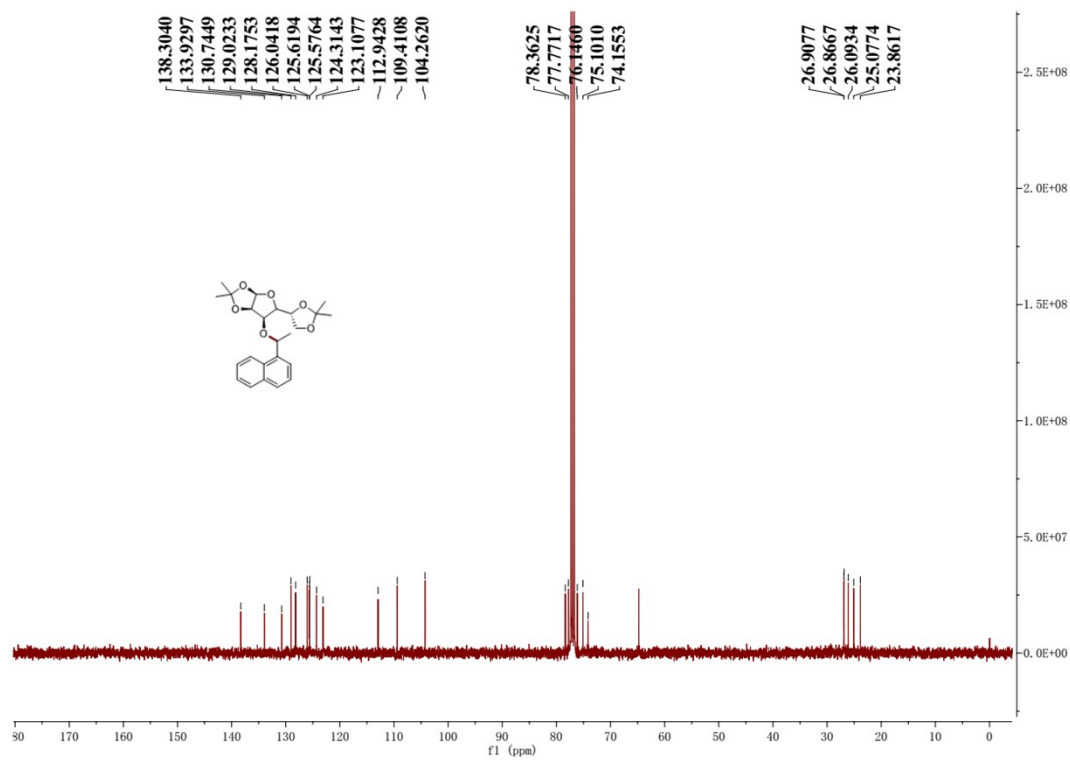

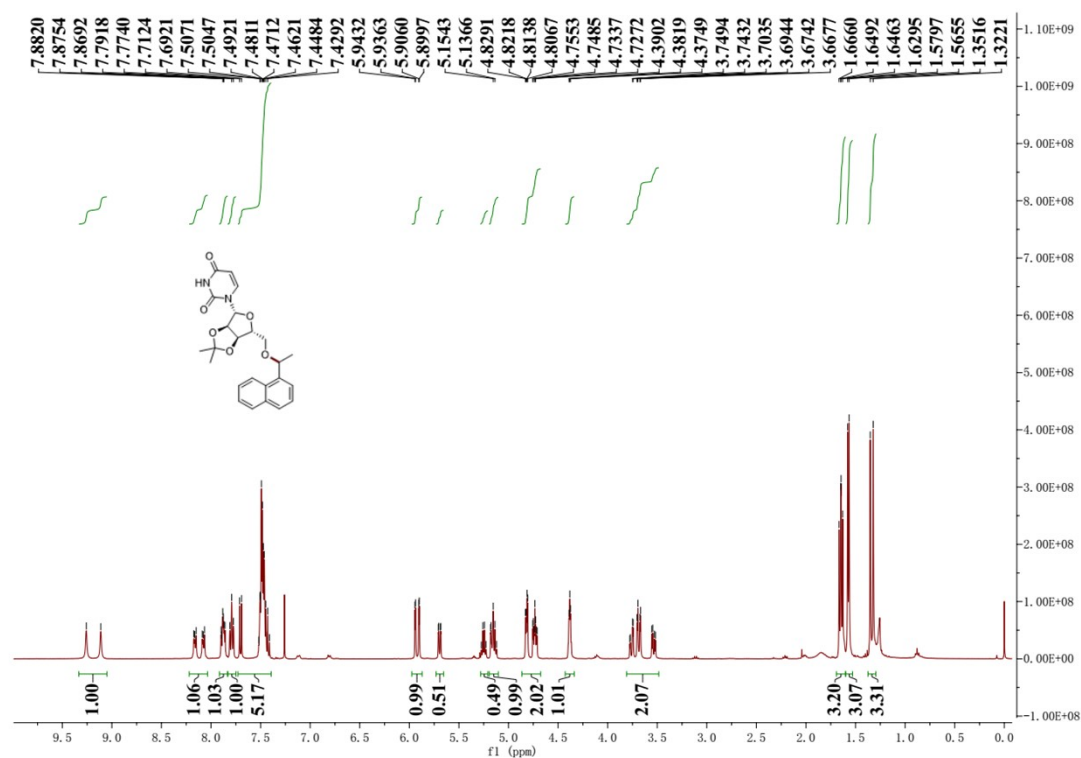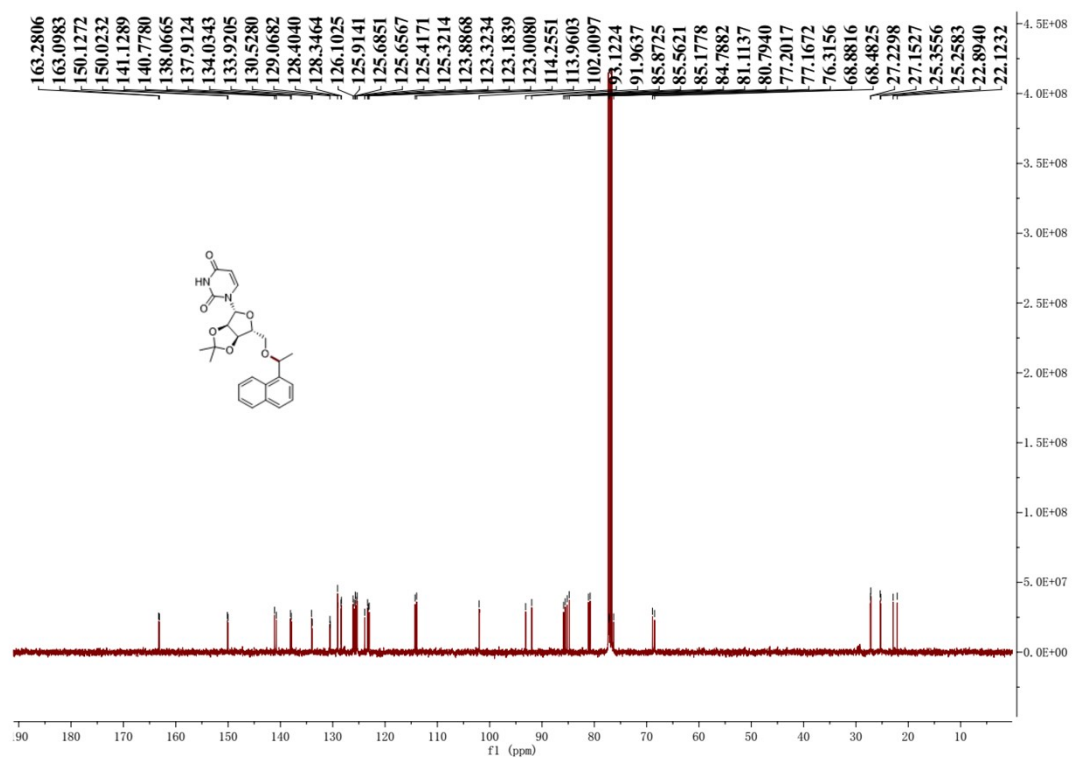

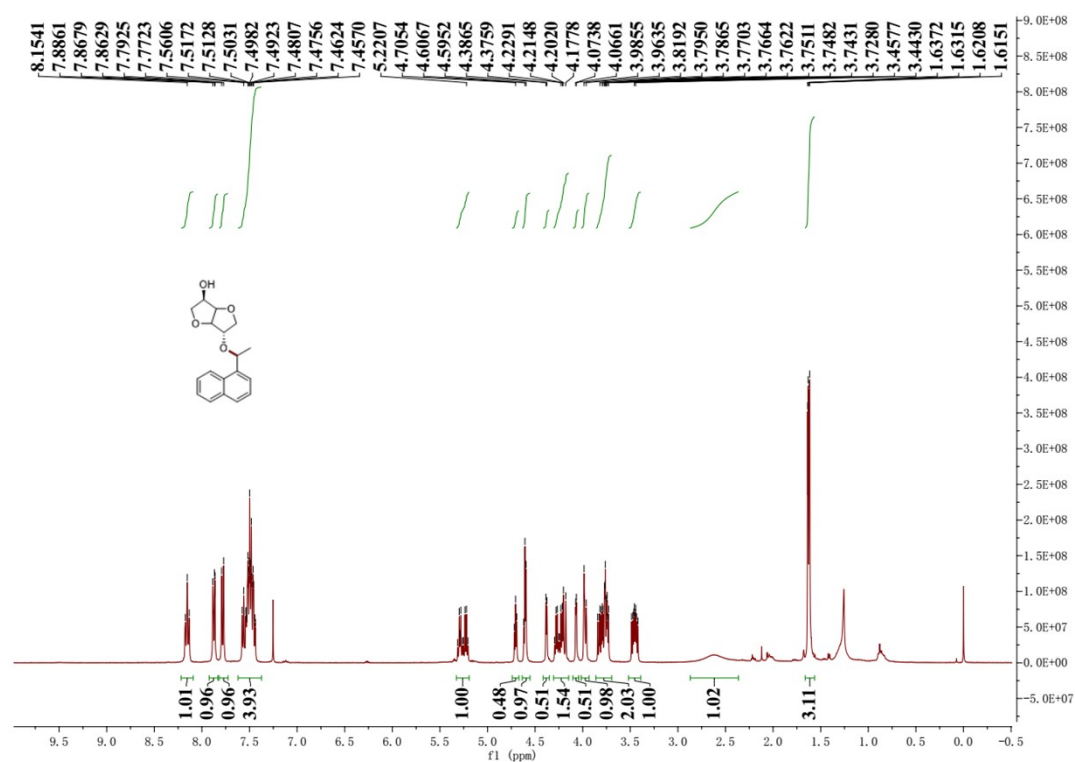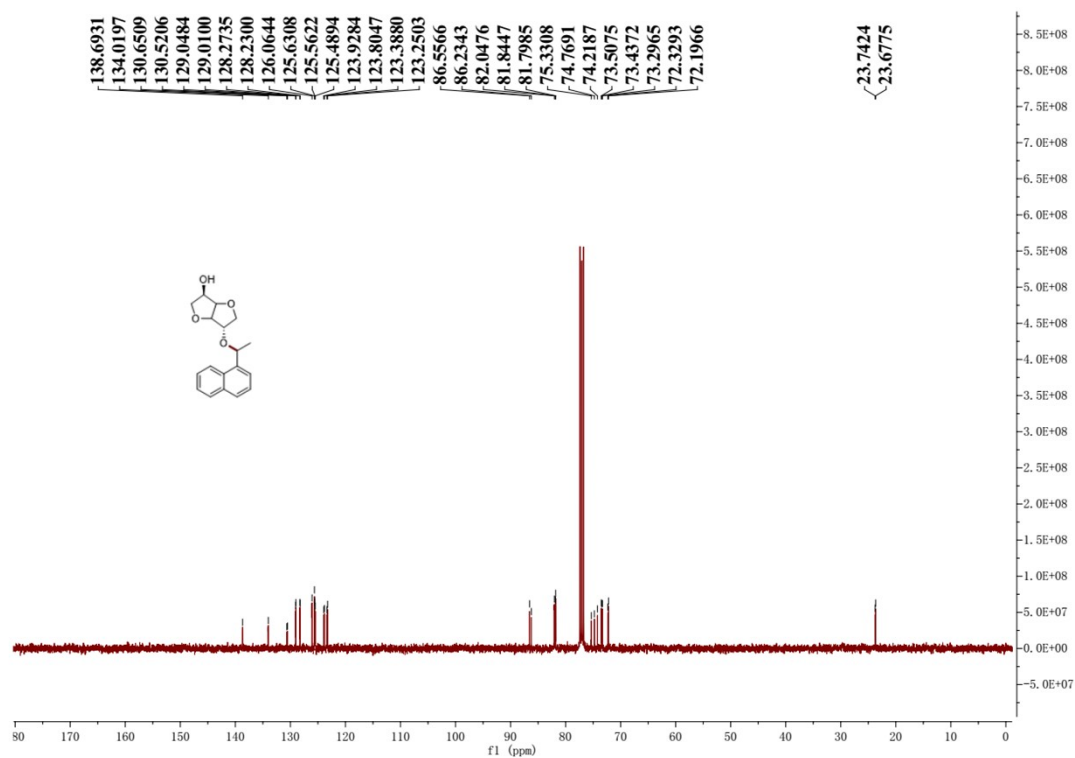

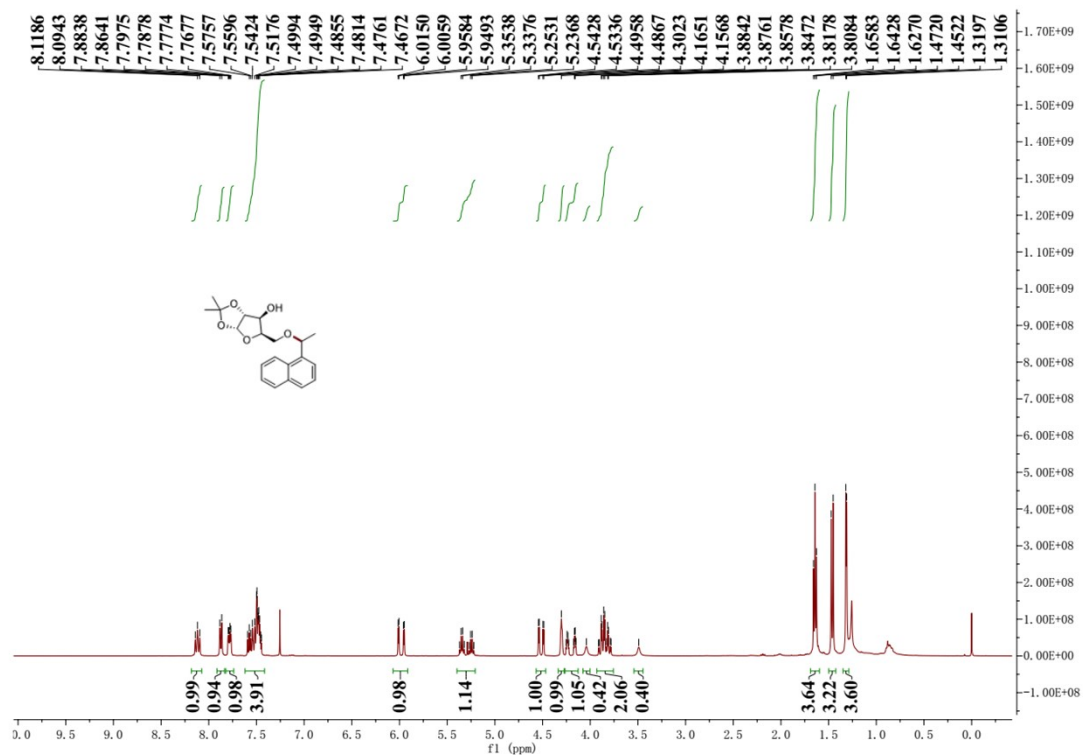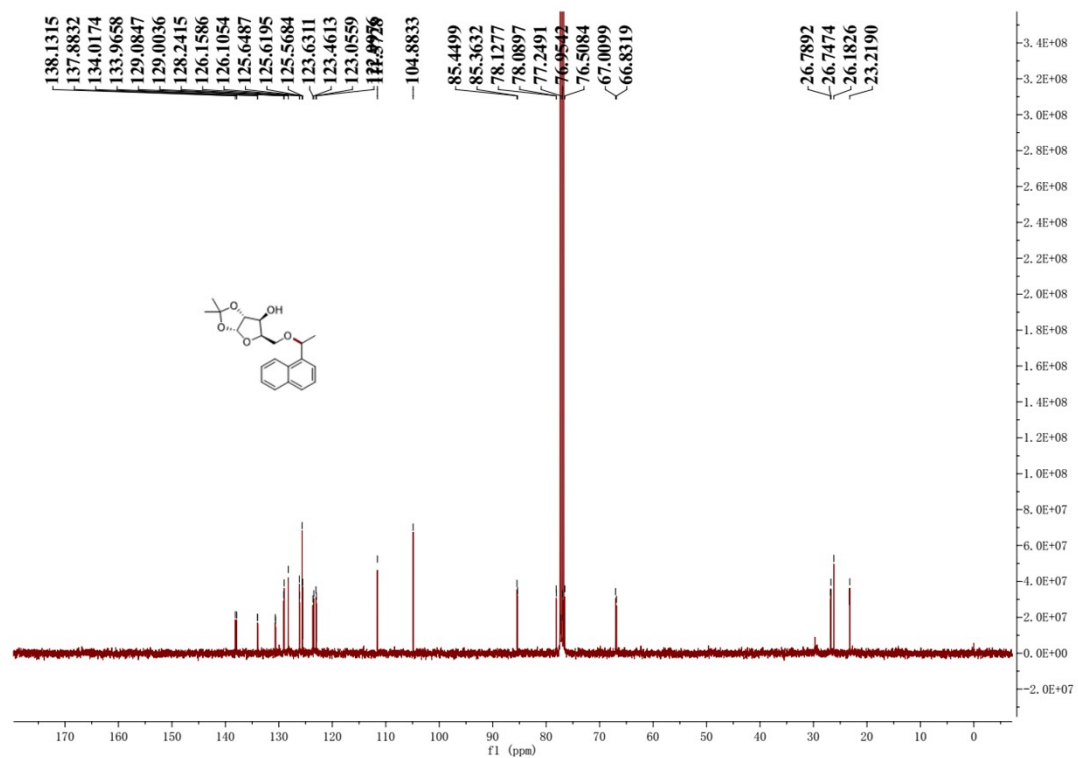



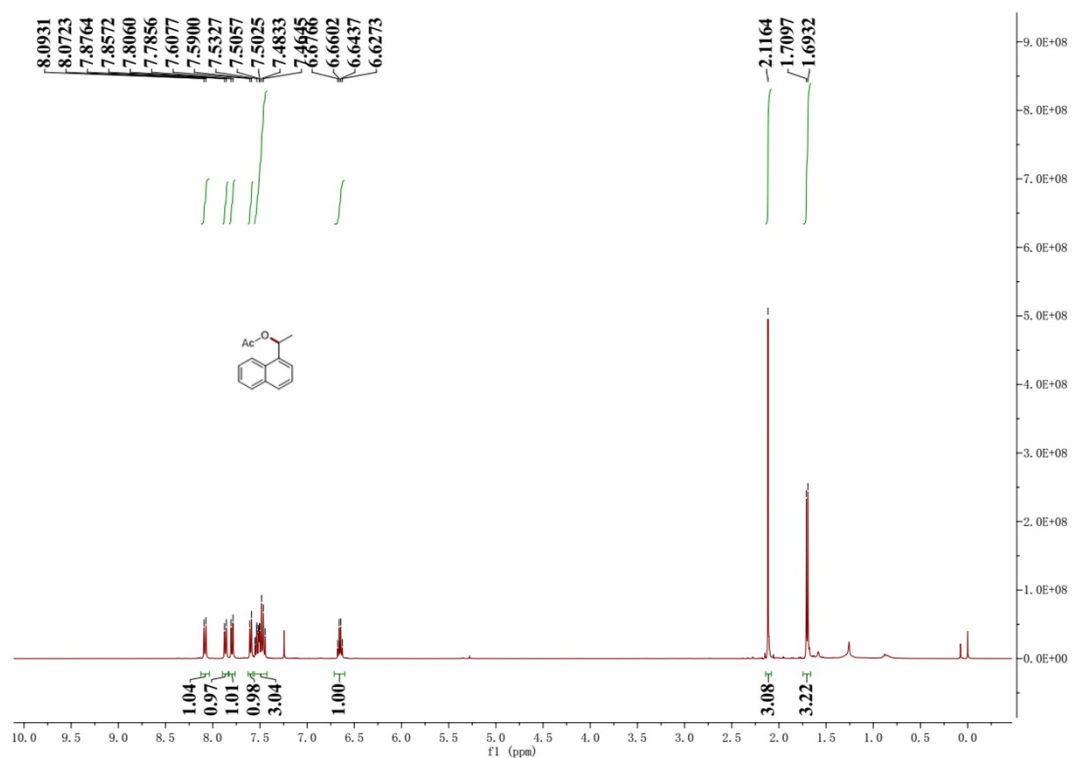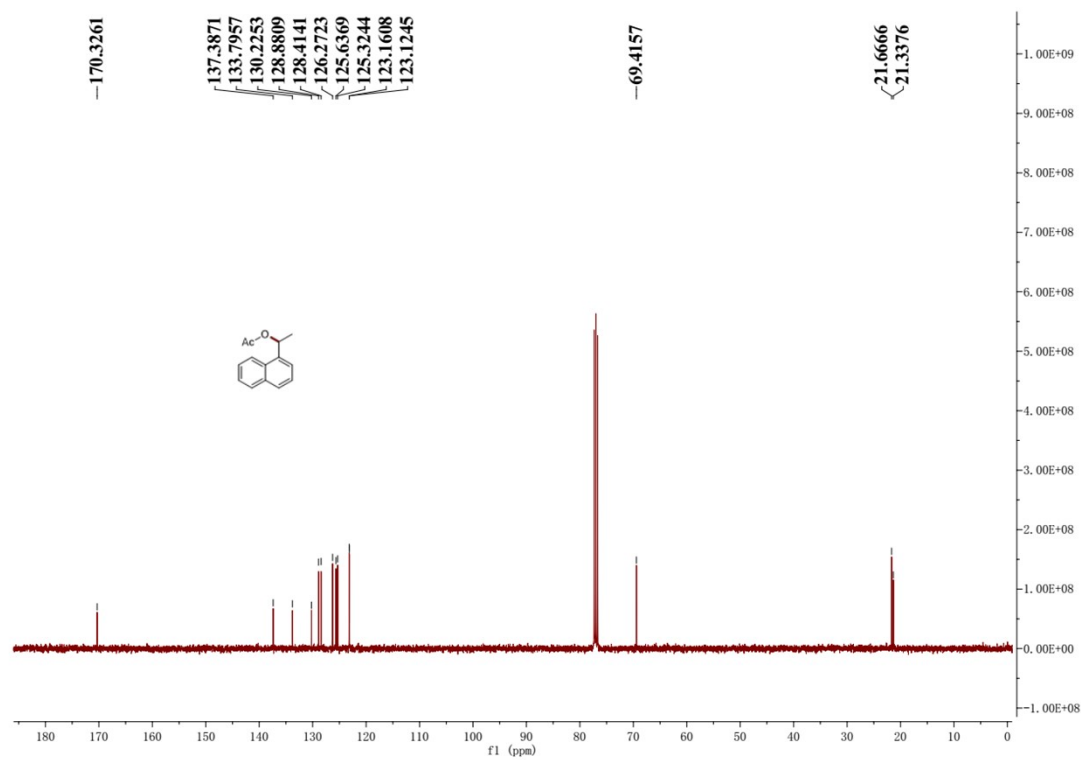

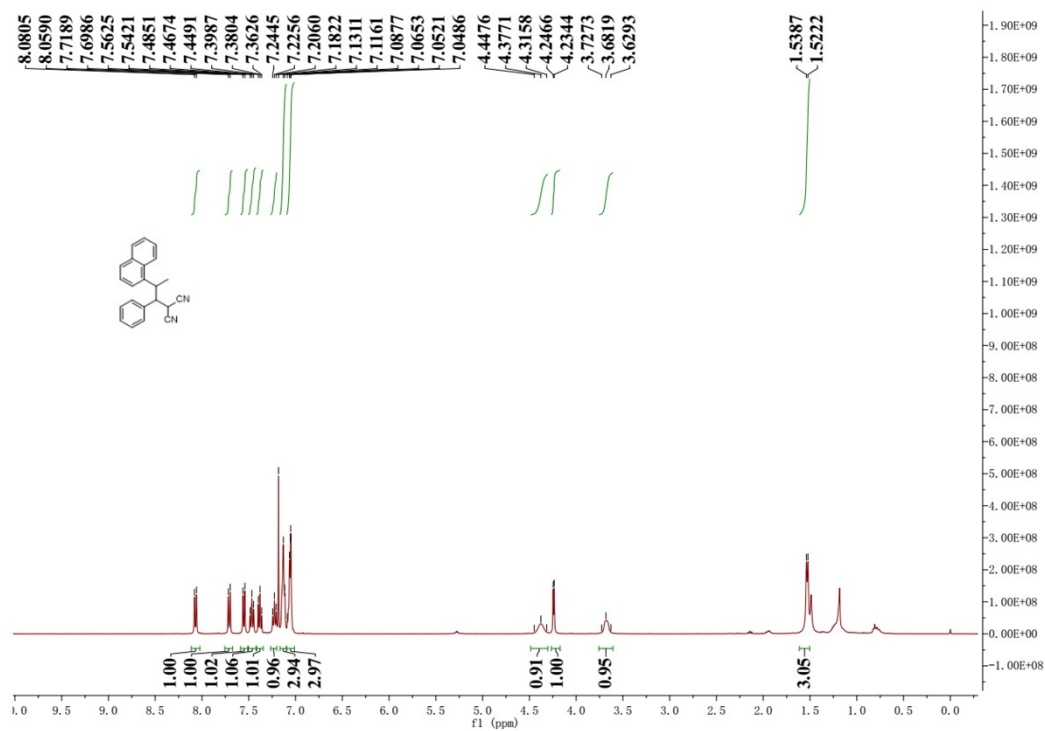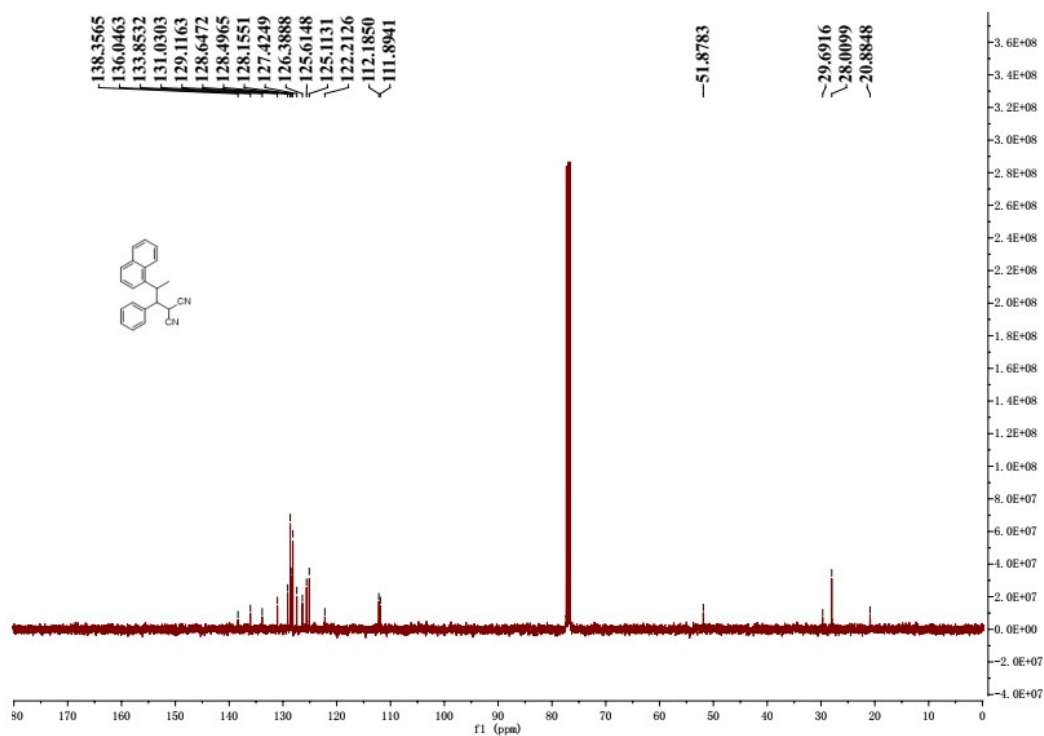

Supplement: d1qo01421h1.pdf [file d1qo01421h1.pdf]
